# Supplementary material
Source: publisher figshare collection journal article supplement (https://acs.figshare.com/ndownloader/files/4276234)

**A Chemoenzymatic Total Synthesis of (+)-Clividine**

Lorenzo V. White, Brett D. Schwartz, Martin G. Banwell\* and Anthony C. Willis

*Research School of Chemistry, Institute of Advanced Studies,  
The Australian National University, Canberra ACT 0200, Australia*

mgb@rsc.anu.edu.au

| <b>Contents</b>                                                                                                                                                     | <b>Page</b> |
|---------------------------------------------------------------------------------------------------------------------------------------------------------------------|-------------|
| X-ray Crystallographic Studies on the Oxalate Salt of C11b- <i>epi-ent-1</i> ,<br>the Picrate Salt of <i>ent-1</i> and Compounds <b>6</b> , <b>10</b> and <b>15</b> | S2–S6       |
| – X-ray Crystallographic Data                                                                                                                                       | S2          |
| – Structure Determination                                                                                                                                           | S2          |
| – Anisotropic Displacement Ellipsoid Plots                                                                                                                          | S3–S6       |
| References                                                                                                                                                          | S6          |
| <sup>1</sup> H or <sup>13</sup> C NMR Spectra of Compounds <i>ent-1</i> , C11b- <i>epi-ent-1</i> ,<br><b>5–8</b> , <b>10</b> , <b>12–15</b> and <b>17–24</b>        | S7–S44      |

## X-ray Crystallographic Studies

### *X-ray Crystallographic Data*

*Oxalate salt of C11b-epi-ent-1.*  $C_{17}H_{20}NO_5^+ \cdot C_2HO_4^-$ ,  $M = 407.38$ ,  $T = 200$  K, monoclinic, space group  $P2_1$ ,  $Z = 2$ ,  $a = 7.8532(4)$ ,  $b = 7.8328(4)$ ,  $c = 15.1100(8)$  Å,  $\beta = 93.534(3)^\circ$ ,  $V = 927.69(8)$  Å<sup>3</sup>,  $D_x = 1.458$  g cm<sup>-3</sup>, 1761 unique data ( $\theta = 2.7$ – $25^\circ$ ),  $R = 0.035$  [for 1629 with  $I > 2.0\sigma(I)$ ];  $R_w = 0.086$  (all data),  $S = 1.03$ .

*Picrate salt of ent-1.*  $2(C_{17}H_{20}NO_5^+) \cdot 2(C_6H_2N_3O_7^-) \cdot 7.87H_2O \cdot 0.315CH_3CN$ ,  $M = 1247.6$ ,  $T = 200$  K, monoclinic, space group  $P2_1$ ,  $Z = 2$ ,  $a = 8.6590(2)$ ,  $b = 35.4747(9)$ ,  $c = 9.0925(2)$  Å,  $\beta = 101.1071(12)^\circ$ ,  $V = 2740.68(11)$  Å<sup>3</sup>,  $D_x = 1.512$  g cm<sup>-3</sup>, 4933 unique data ( $\theta = 2.6$ – $25.1^\circ$ ),  $R = 0.050$  [for 3901 with  $I > 2.0\sigma(I)$ ];  $R_w = 0.110$  (all data),  $S = 1.02$ .

*Compound 6.*  $C_{11}H_{14}BrNO_3$ ,  $M = 288.14$ ,  $T = 200$  K, monoclinic, space group  $P2_1$ ,  $Z = 2$ ,  $a = 10.0349(3)$ ,  $b = 5.8790(1)$ ,  $c = 11.4499(3)$  Å,  $\beta = 113.6267(15)^\circ$ ,  $V = 618.87(3)$  Å<sup>3</sup>,  $D_x = 1.546$  g cm<sup>-3</sup>, 2718 unique data ( $\theta = 2.6$ – $27.5^\circ$ ),  $R = 0.025$  [for 2619 with  $I > 2.0\sigma(I)$ ];  $R_w = 0.065$  (all data),  $S = 1.01$ , Flack parameter =  $-0.015(7)$ .

*Compound 10.*  $C_{20}H_{21}NO_6$ ,  $M = 371.39$ ,  $T = 200$  K, orthorhombic, space group  $P2_12_12_1$ ,  $Z = 4$ ,  $a = 9.7236(2)$ ,  $b = 13.2103(2)$ ,  $c = 14.0965(2)$  Å,  $V = 1810.72(6)$  Å<sup>3</sup>,  $D_x = 1.362$  g cm<sup>-3</sup>, 2977 unique data ( $\theta = 2.6$ – $30^\circ$ ),  $R = 0.034$  [for 2703 with  $I > 2.0\sigma(I)$ ];  $R_w = 0.087$ ,  $S = 1.00$ .

*Compound 15.*  $C_{17}H_{19}NO_5$ ,  $M = 317.34$ ,  $T = 200$  K, monoclinic, space group  $P2_1$ ,  $Z = 2$ ,  $a = 8.6115(8)$ ,  $b = 7.9108(8)$ ,  $c = 11.2630(12)$  Å,  $\beta = 105.651(6)^\circ$ ,  $V = 738.83(13)$  Å<sup>3</sup>,  $D_x = 1.426$  g cm<sup>-3</sup>, 1411 unique data ( $\theta = 2.7$ – $25.1^\circ$ ),  $R = 0.081$  [for 1103 with  $I > 2.0\sigma(I)$ ];  $R_w = 0.236$  (all data),  $S = 1.02$ .

### *Structure Determination*

Images were measured on a Nonius Kappa CCD diffractometer (MoK $\alpha$ , graphite monochromator,  $\lambda = 0.71073$  Å) and data extracted using the DENZO package.<sup>1</sup> Structure solution was by direct methods (SIR92).<sup>2</sup> The structures of the abovementioned compounds were refined using the CRYSTALS program package.<sup>3</sup> Atomic coordinates, bond lengths and angles, and displacement parameters have been deposited at the Cambridge Crystallographic Data Centre (CCDC nos. 813598–813602 for the oxalate salt of compound C11b-epi-ent-1, the picrate salt of compound ent-1 and compounds 6, 10 and 15, respectively). These data can be obtained free-of-charge via [www.ccdc.cam.ac.uk/data\\_request/cif](http://www.ccdc.cam.ac.uk/data_request/cif), by emailing [data\\_request@ccdc.cam.ac.uk](mailto:data_request@ccdc.cam.ac.uk), or by contacting The Cambridge Crystallographic Data Centre, 12 Union Road, Cambridge CB2 1EZ, UK; fax: +44 1223 336033.

## Anisotropic Displacement Ellipsoid Plots

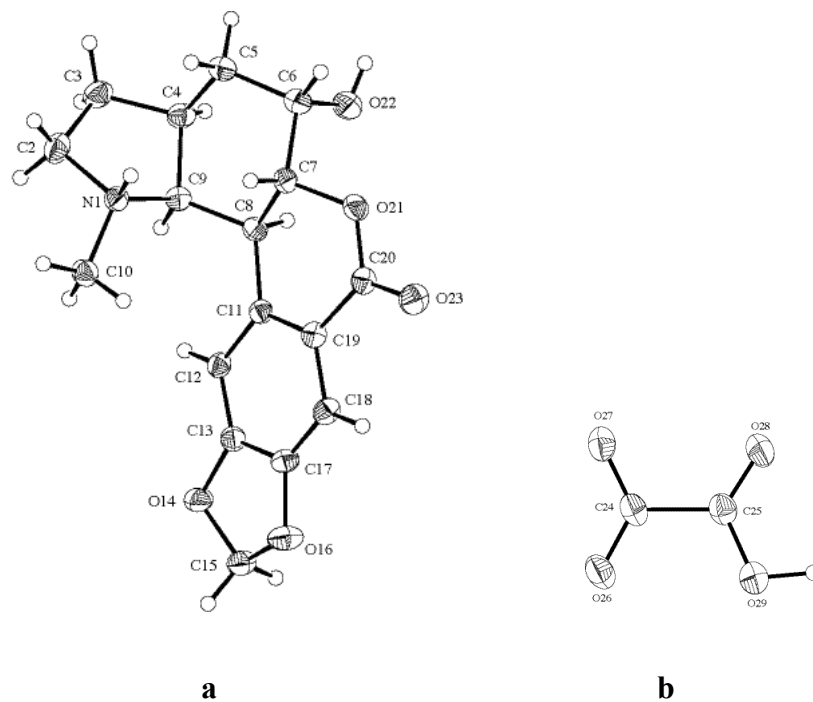

**Figure S1.** Structure of the oxalate salt of C11b-*epi-ent*-1 (CCDC 813598, **a** =  $\text{C}_{17}\text{H}_{20}\text{NO}_5^+$  cation, **b** =  $\text{C}_2\text{HO}_4^-$  anion) with labelling of selected atoms. Anisotropic displacement ellipsoids display 30% probability levels. Hydrogen atoms are drawn as circles with small radii.

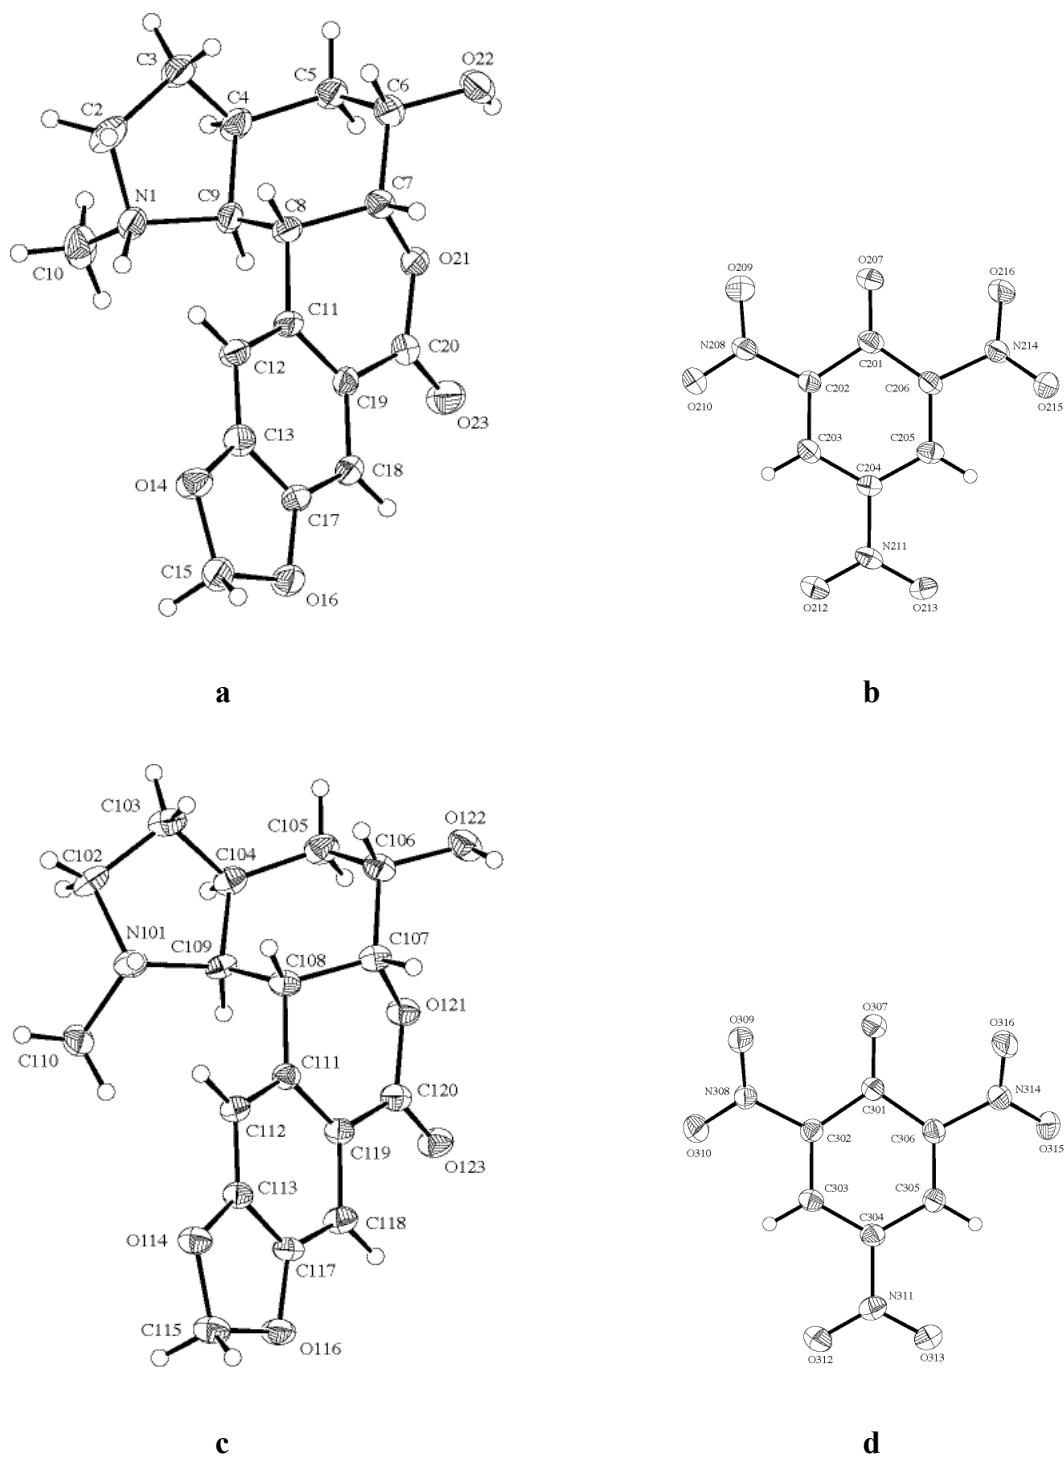

**Figure S2.** Structure of the picrate salt of *ent*-1 (CCDC 813599, **a** =  $C_{17}H_{20}NO_5^+$  cation one, **b** =  $C_6H_2N_3O_7^-$  anion one, **c** =  $C_{17}H_{20}NO_5^+$  cation two, **d** =  $C_6H_2N_3O_7^-$  anion two) with labelling of selected atoms. Anisotropic displacement ellipsoids display 30% probability levels. Hydrogen atoms are drawn as circles with small radii.

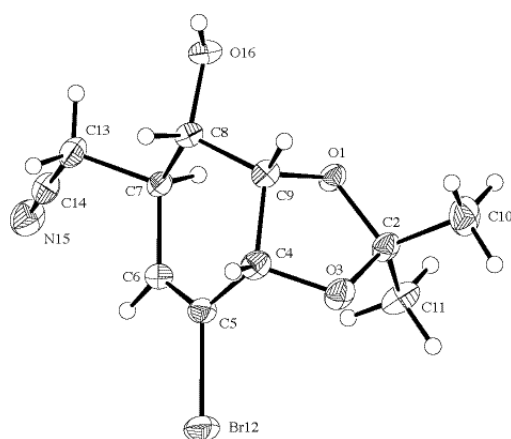

**Figure S3.** Structure of compound **6** (CCDC 813600,  $C_{11}H_{14}BrNO_3$ ) with labelling of selected atoms. Anisotropic displacement ellipsoids display 30% probability levels. Hydrogen atoms are drawn as circles with small radii.

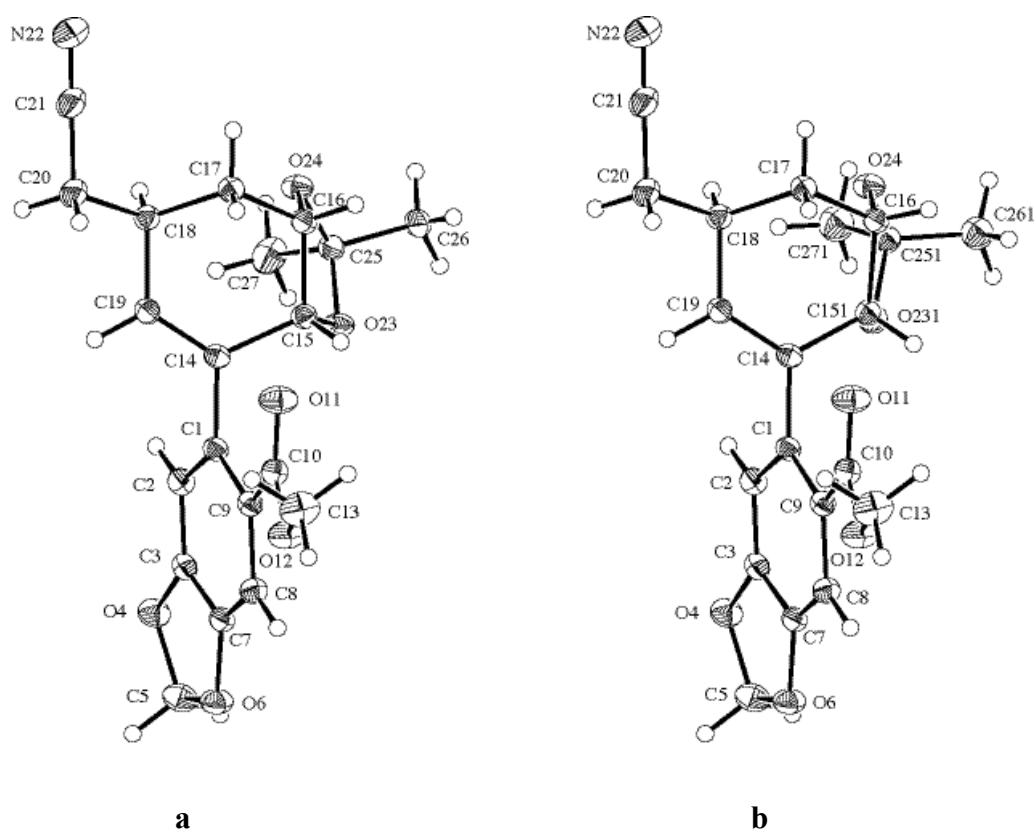

**Figure S4.** Structure of compound **10** (CCDC 813601, **a** =  $C_{20}H_{21}NO_6$  showing the major sites of the disordered atoms, **b** =  $C_{20}H_{21}NO_6$  showing the minor sites of the disordered atoms) with labelling of selected atoms. Anisotropic displacement ellipsoids display 30% probability levels. Hydrogen atoms are drawn as circles with small radii.

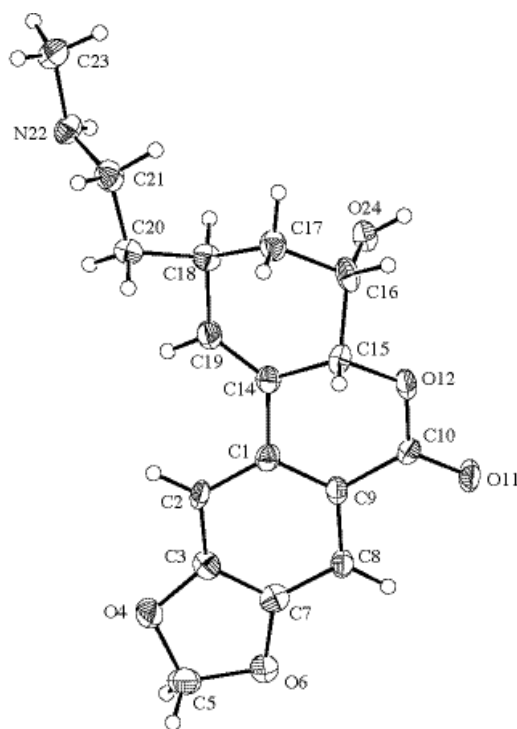

**Figure S5.** Structure of compound **15** (CCDC 813602, C<sub>17</sub>H<sub>19</sub>NO<sub>5</sub>) with labelling of selected atoms. Anisotropic displacement ellipsoids display 30% probability levels. Hydrogen atoms are drawn as circles with small radii.

## References

- (1) DENZO–SMN. Otwinowski, Z.; Minor, W. Processing of X-ray diffraction data collected in oscillation mode. In *Methods in Enzymology, Volume 276: Macromolecular Crystallography, Part A*; Carter Jr., C. W.; Sweet, R. M., Eds.; Academic Press: New York, 1997; pp. 307–326.
- (2) SIR92. Altomare, A.; Cascarano, G.; Giacovazzo, C.; Guagliardi, A.; Burla, M. C.; Polidori, G.; Camalli, M. *J. Appl. Crystallogr.*, **1994**, 27, 435.
- (3) Betteridge, P. W.; Carruthers, J. R.; Cooper, R. I.; Prout, K.; Watkin, D. J. *J. Appl. Crystallogr.*, **2003**, 36, 1487.

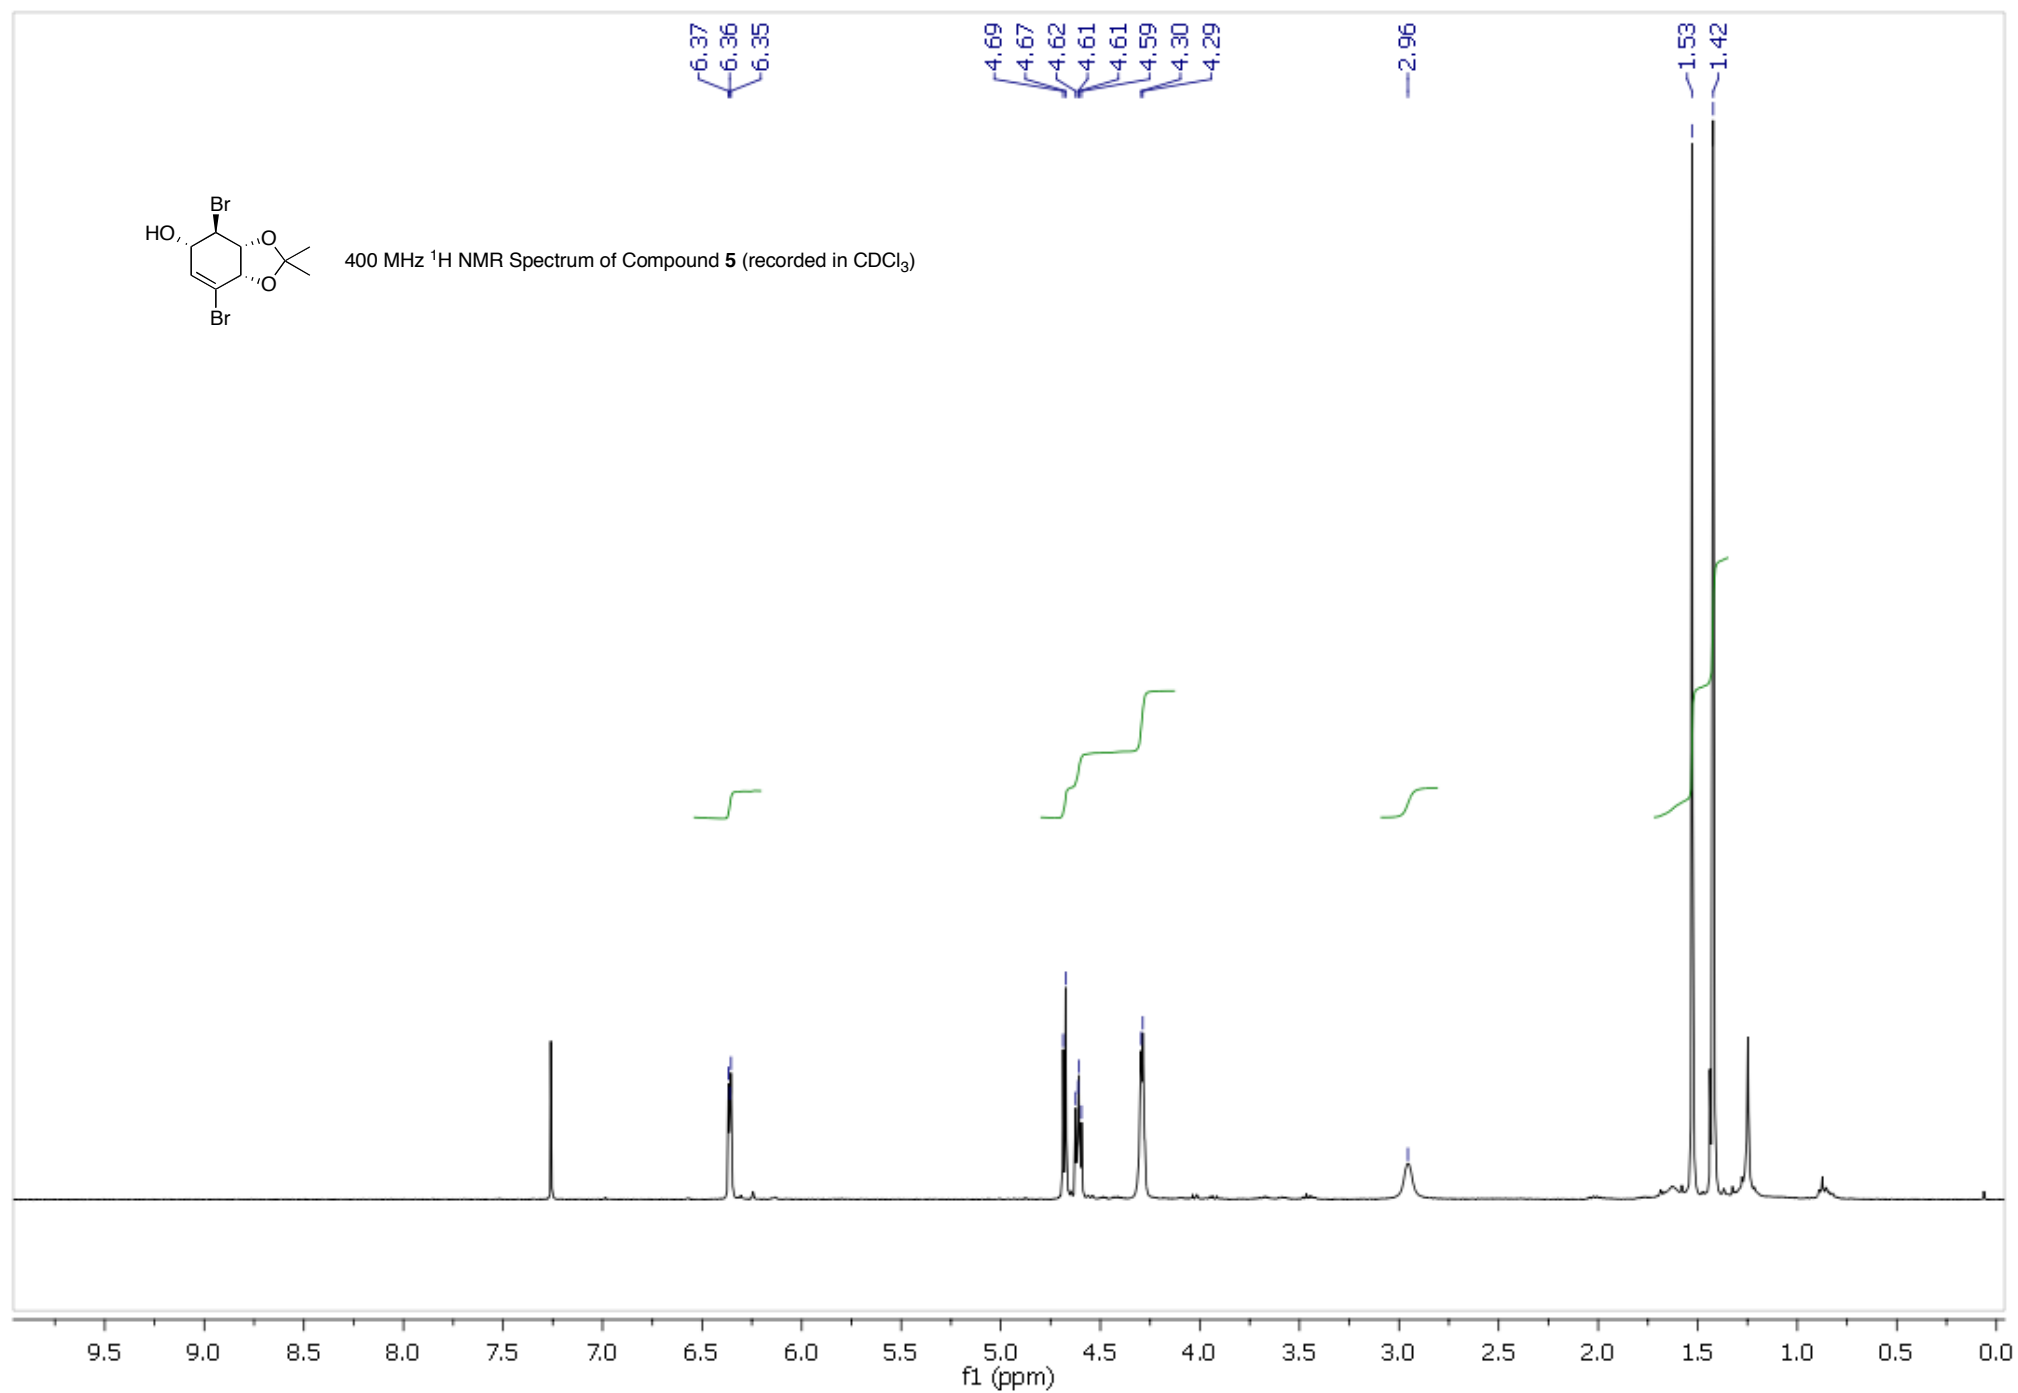

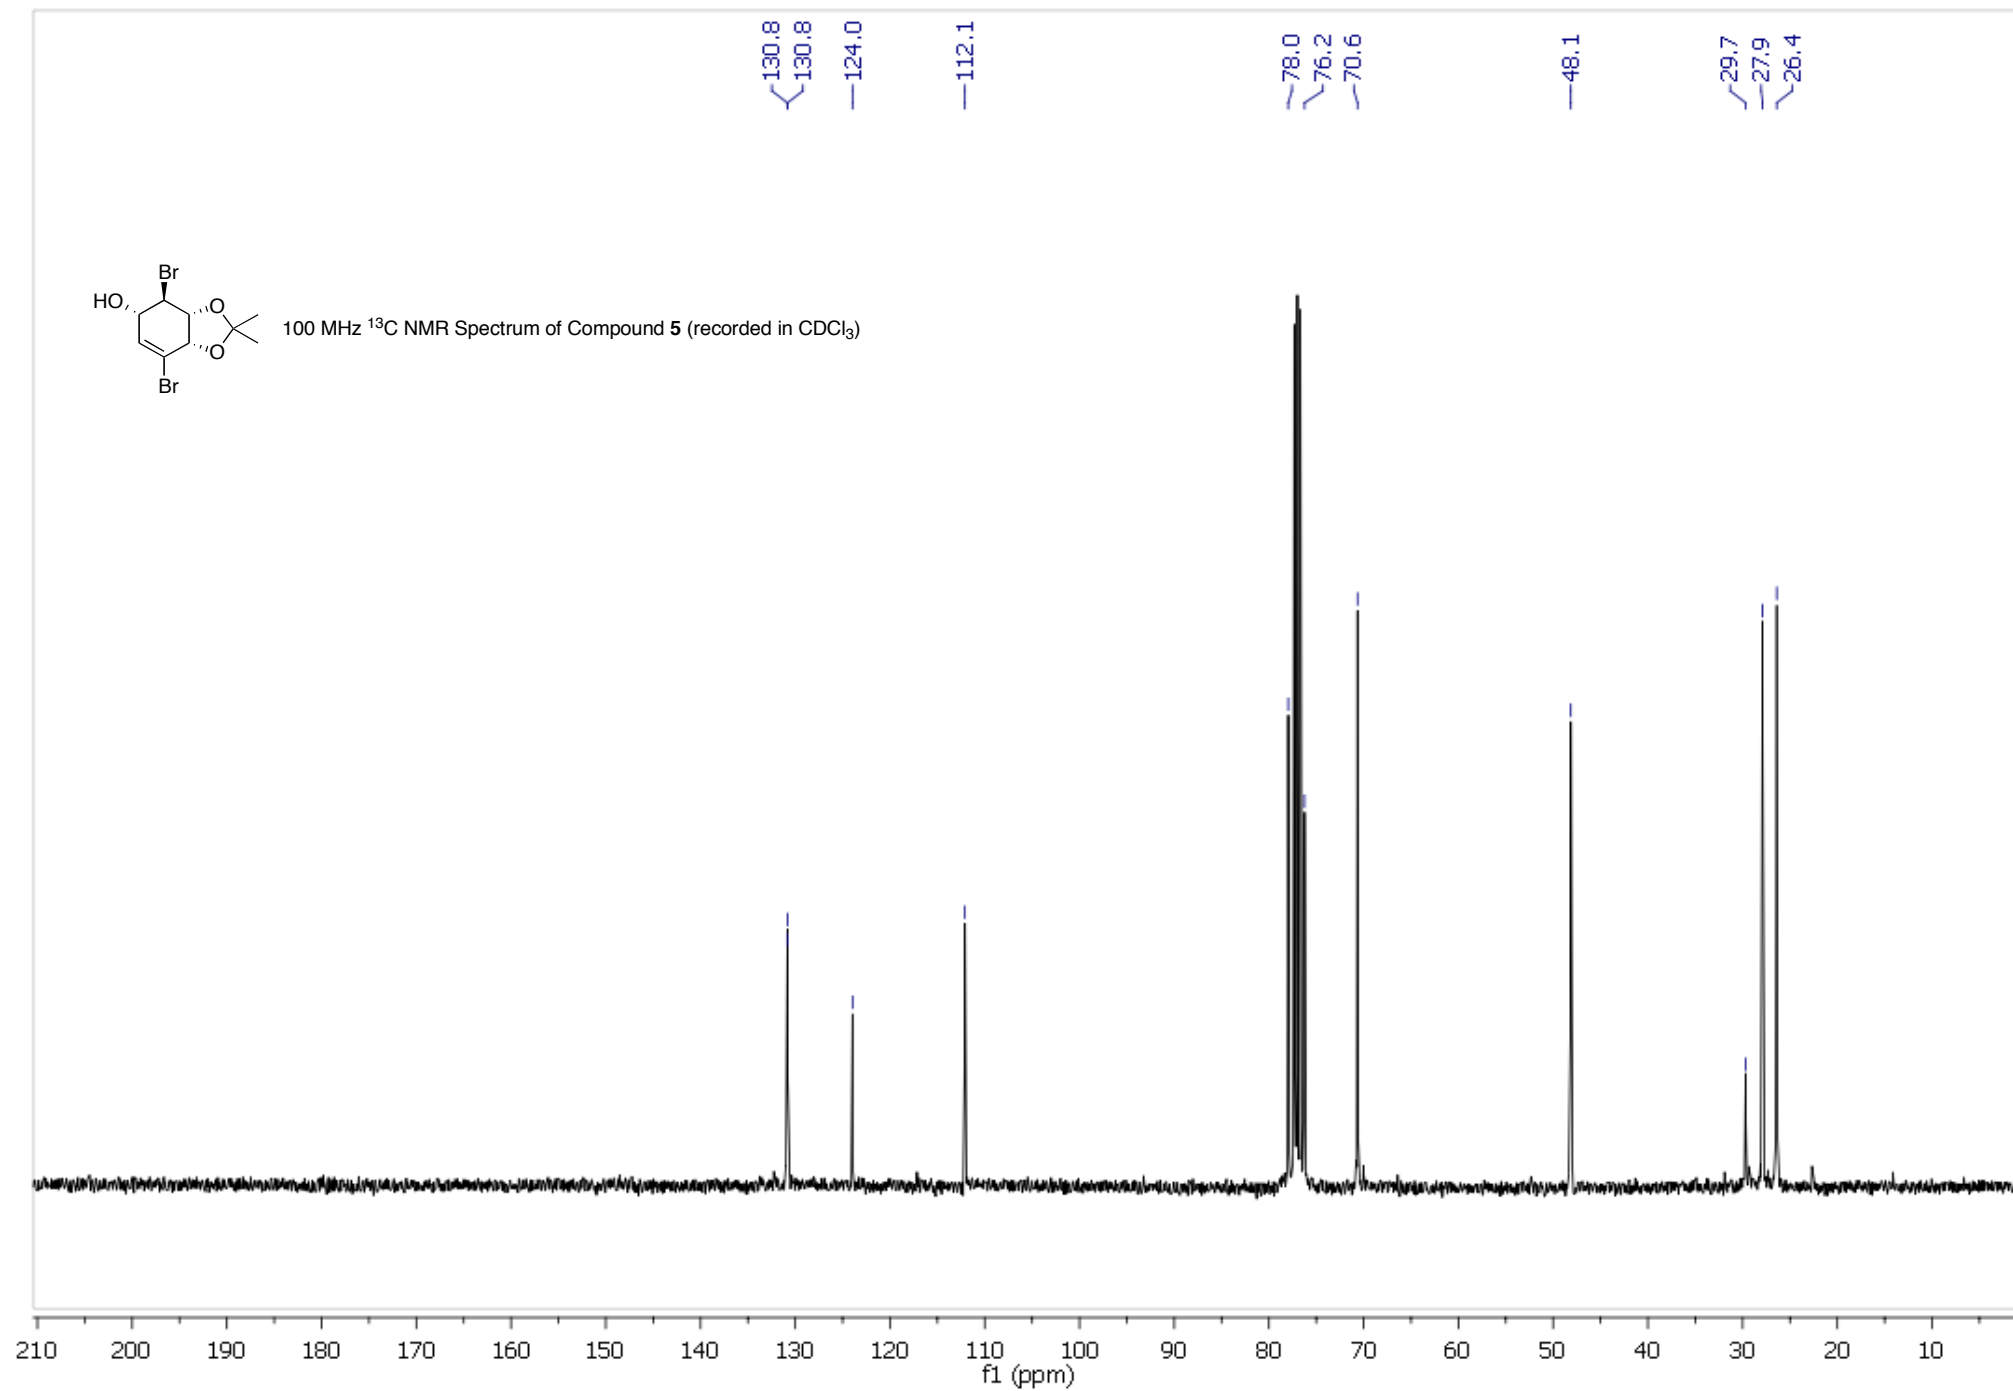



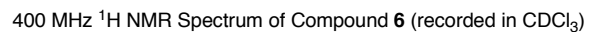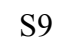

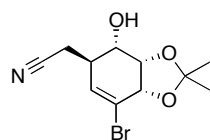

100 MHz  $^{13}\text{C}$  NMR Spectrum of Compound **6** (recorded in  $\text{CDCl}_3$ )

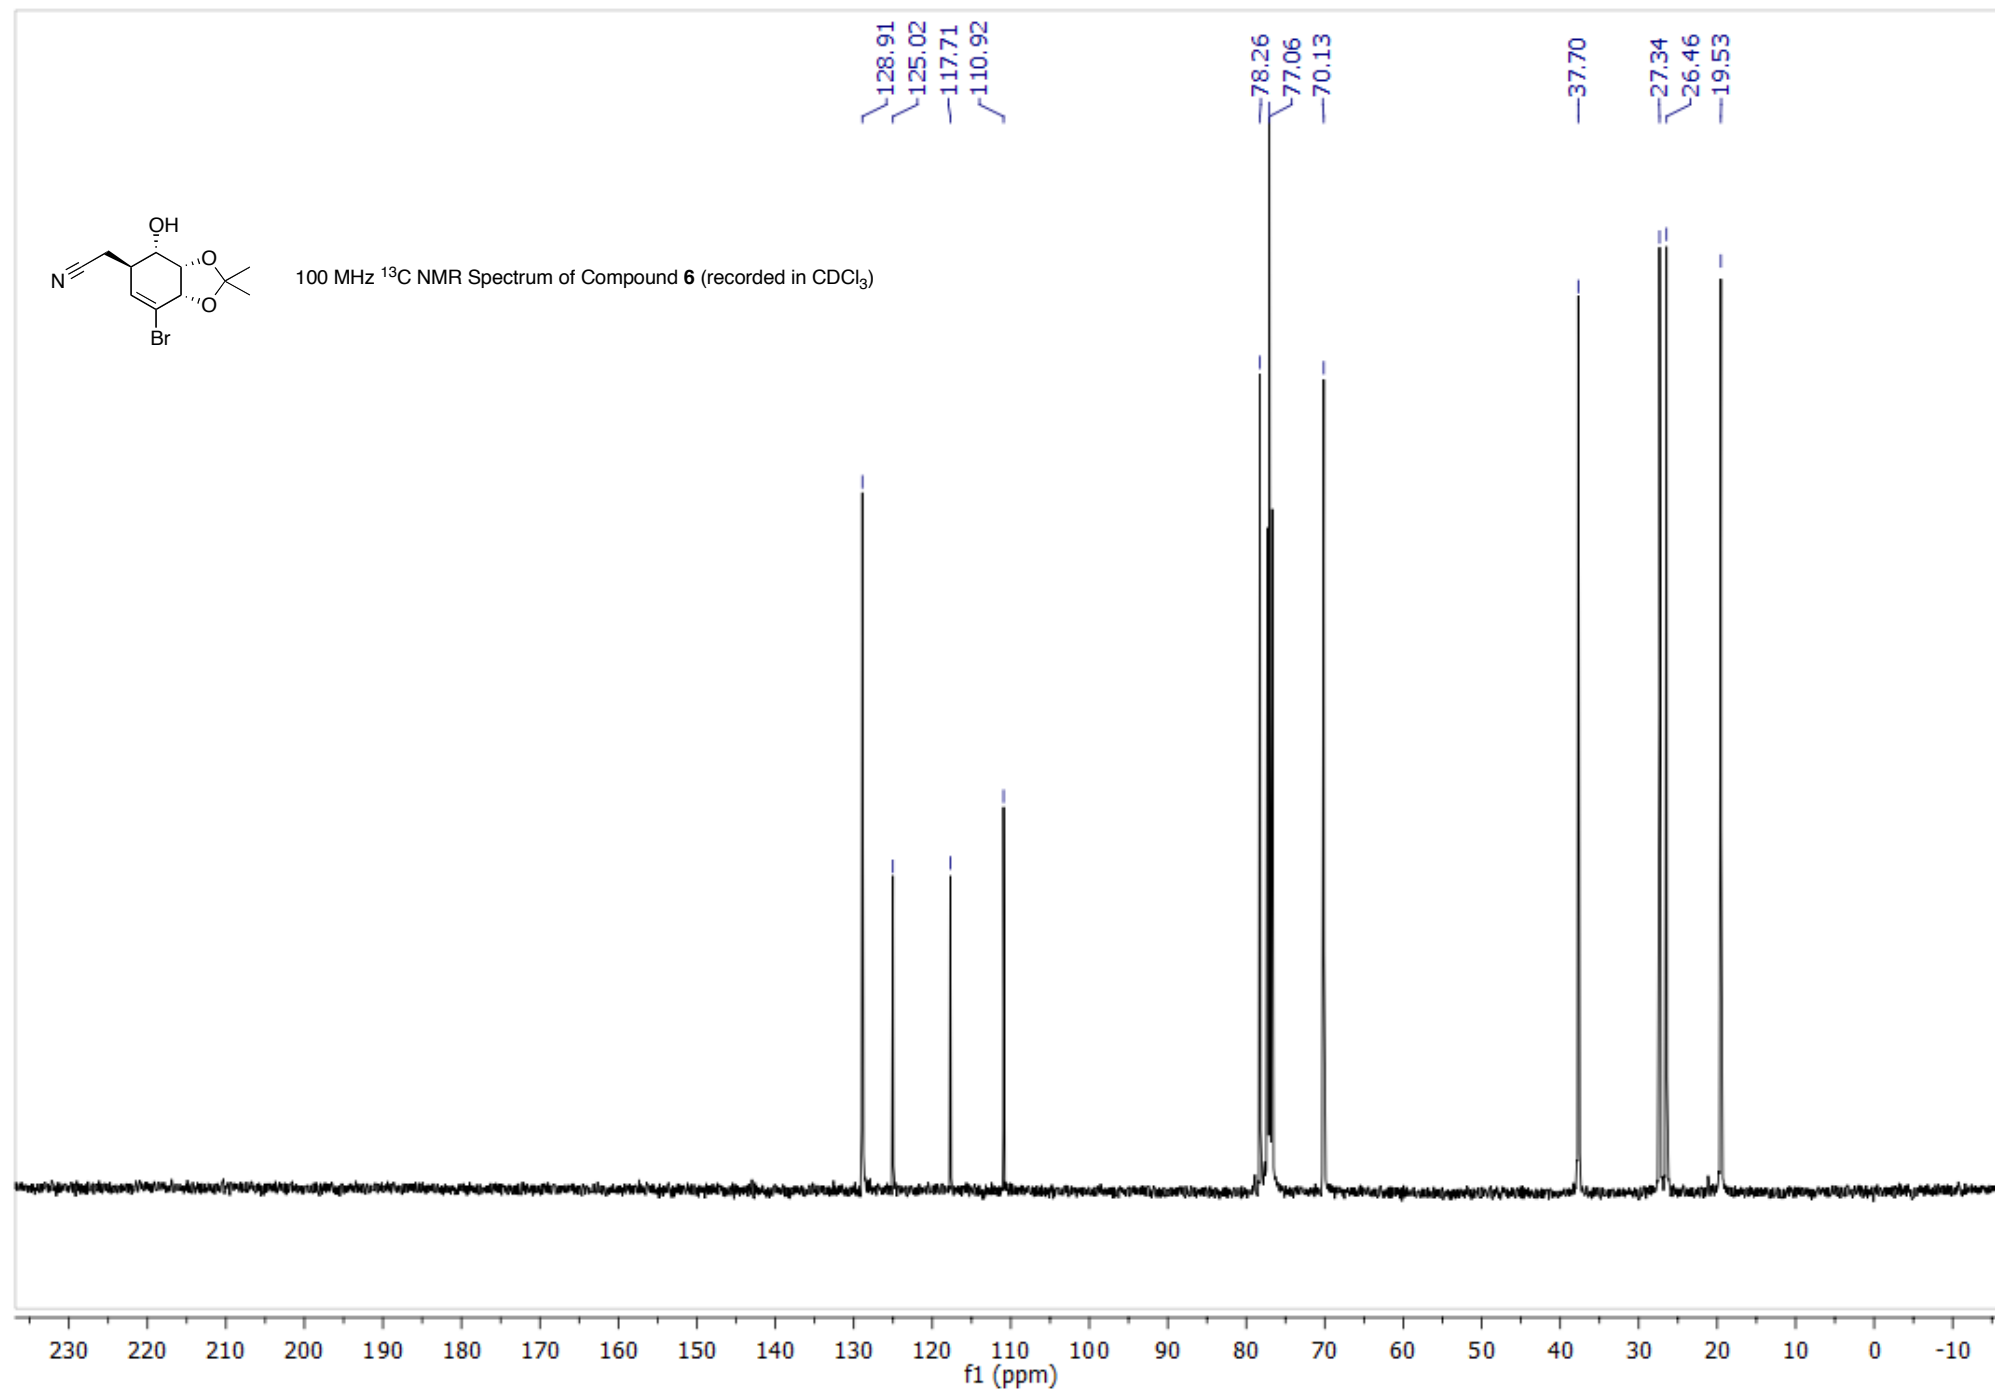

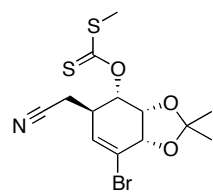

400 MHz  $^1\text{H}$  NMR Spectrum of Compound **7** (recorded in  $\text{CDCl}_3$ )

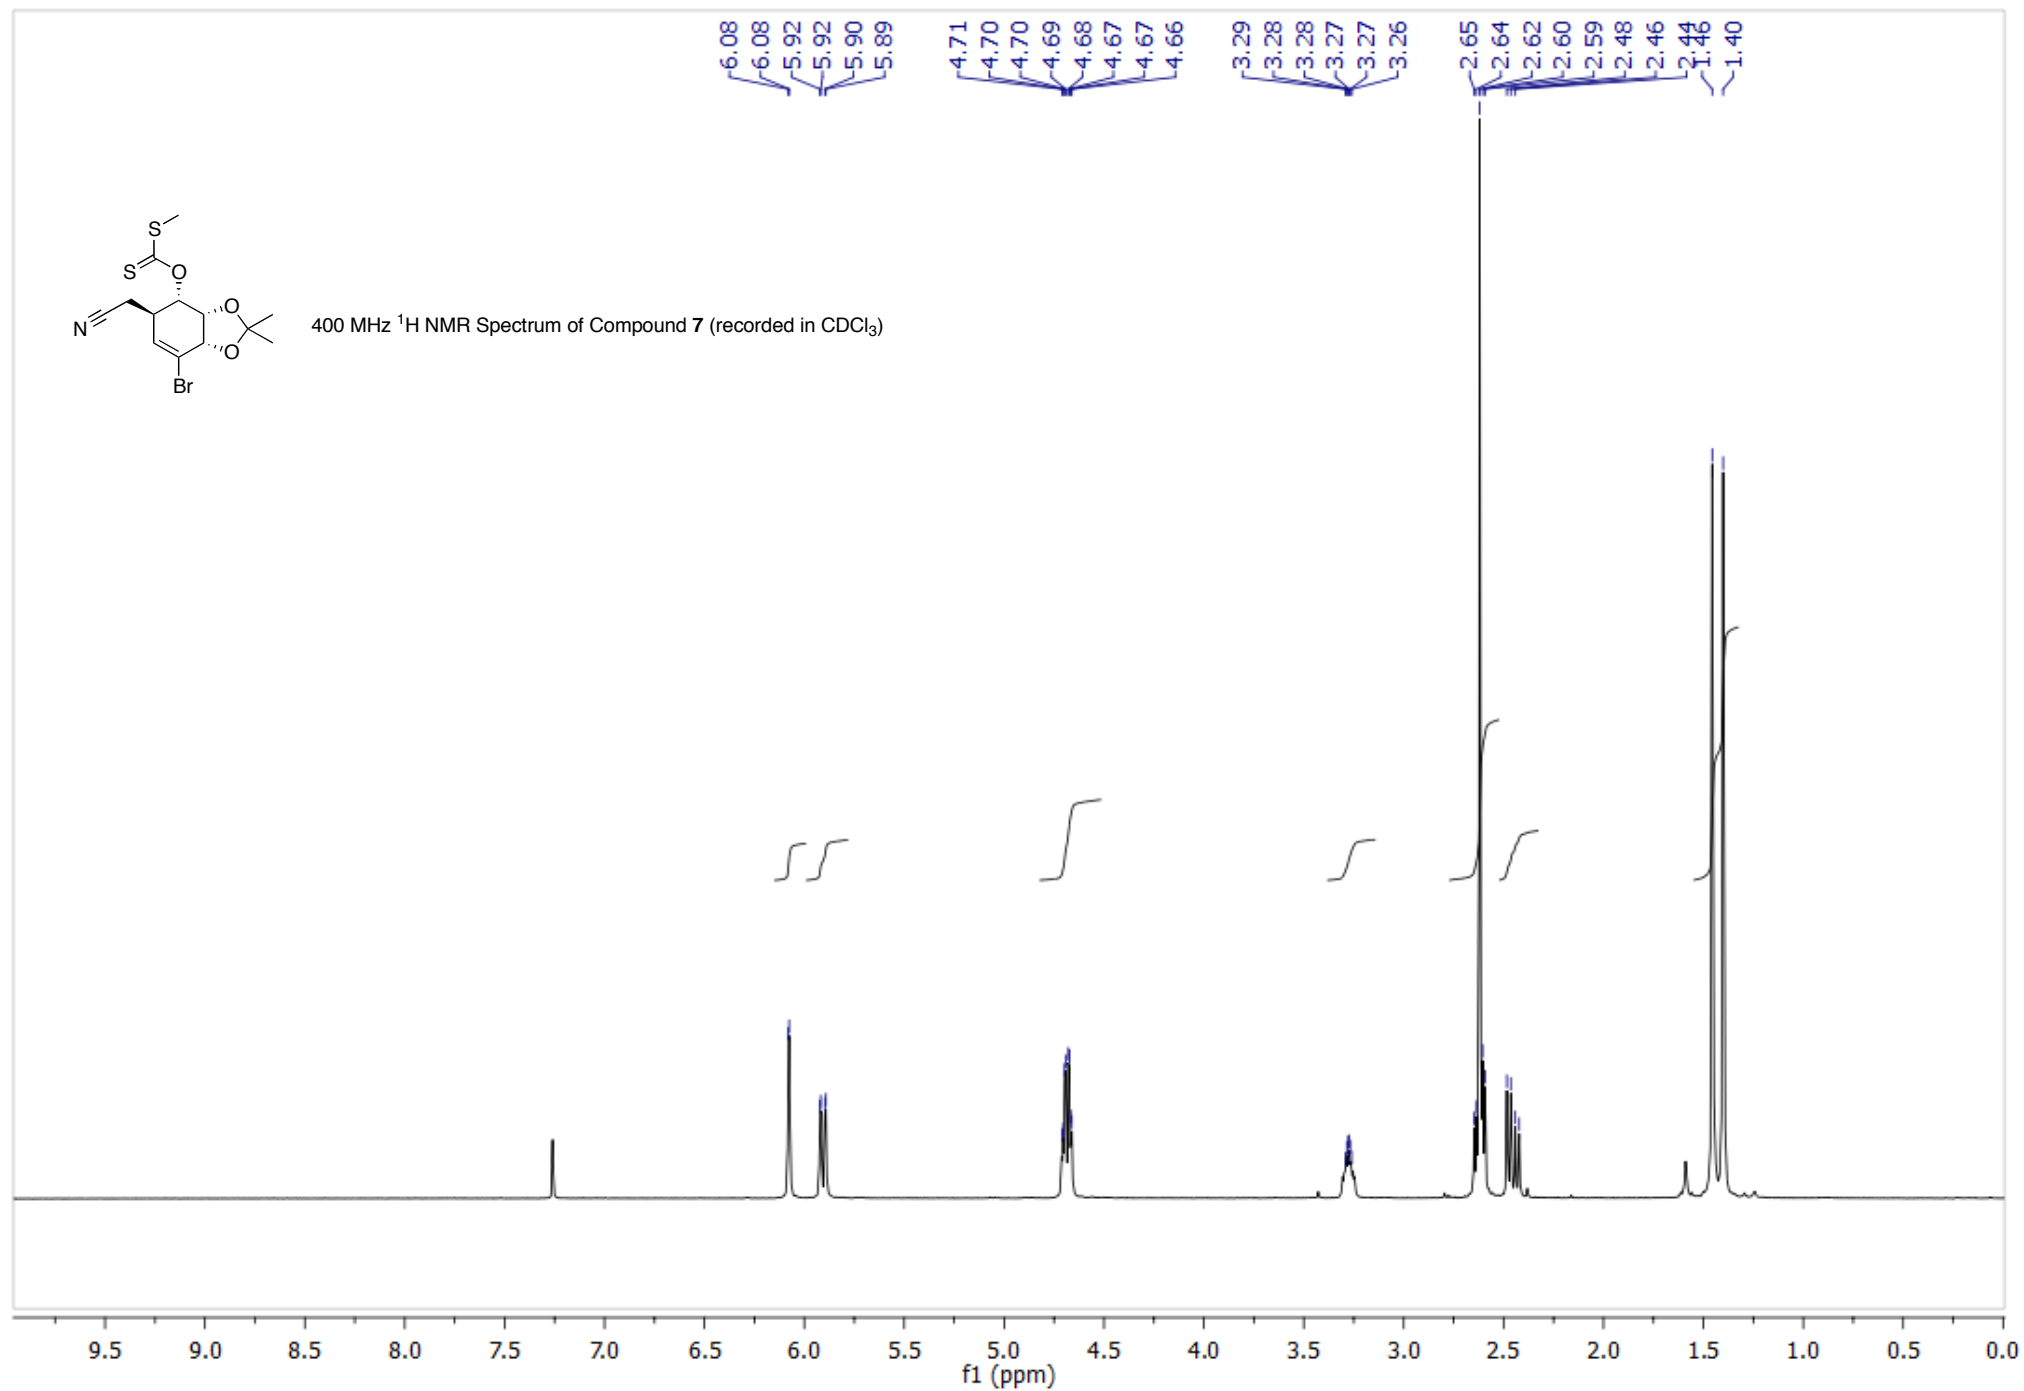

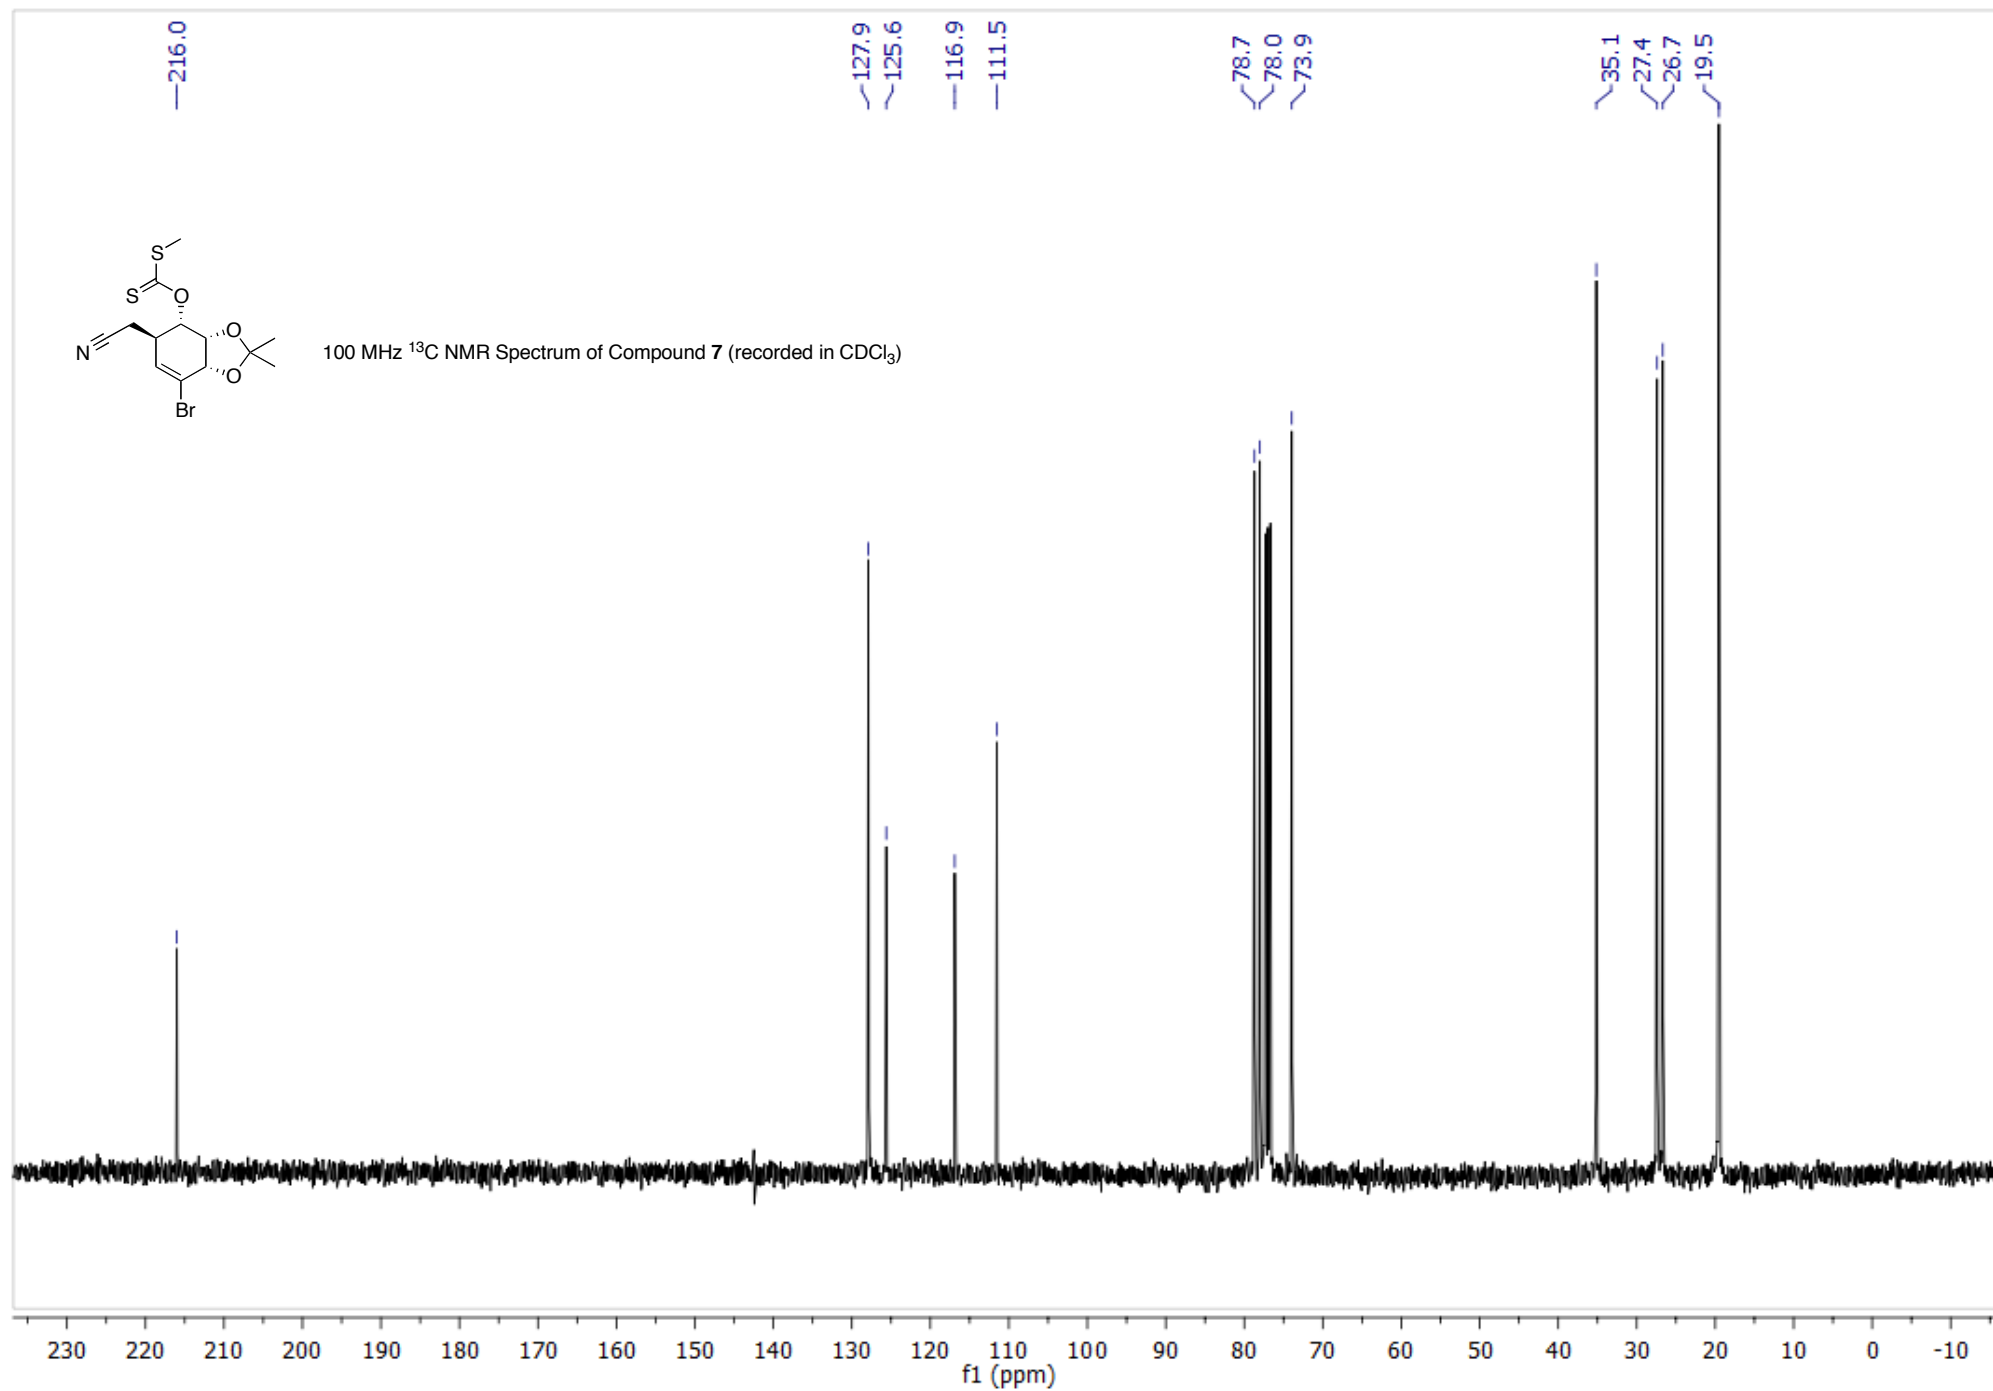

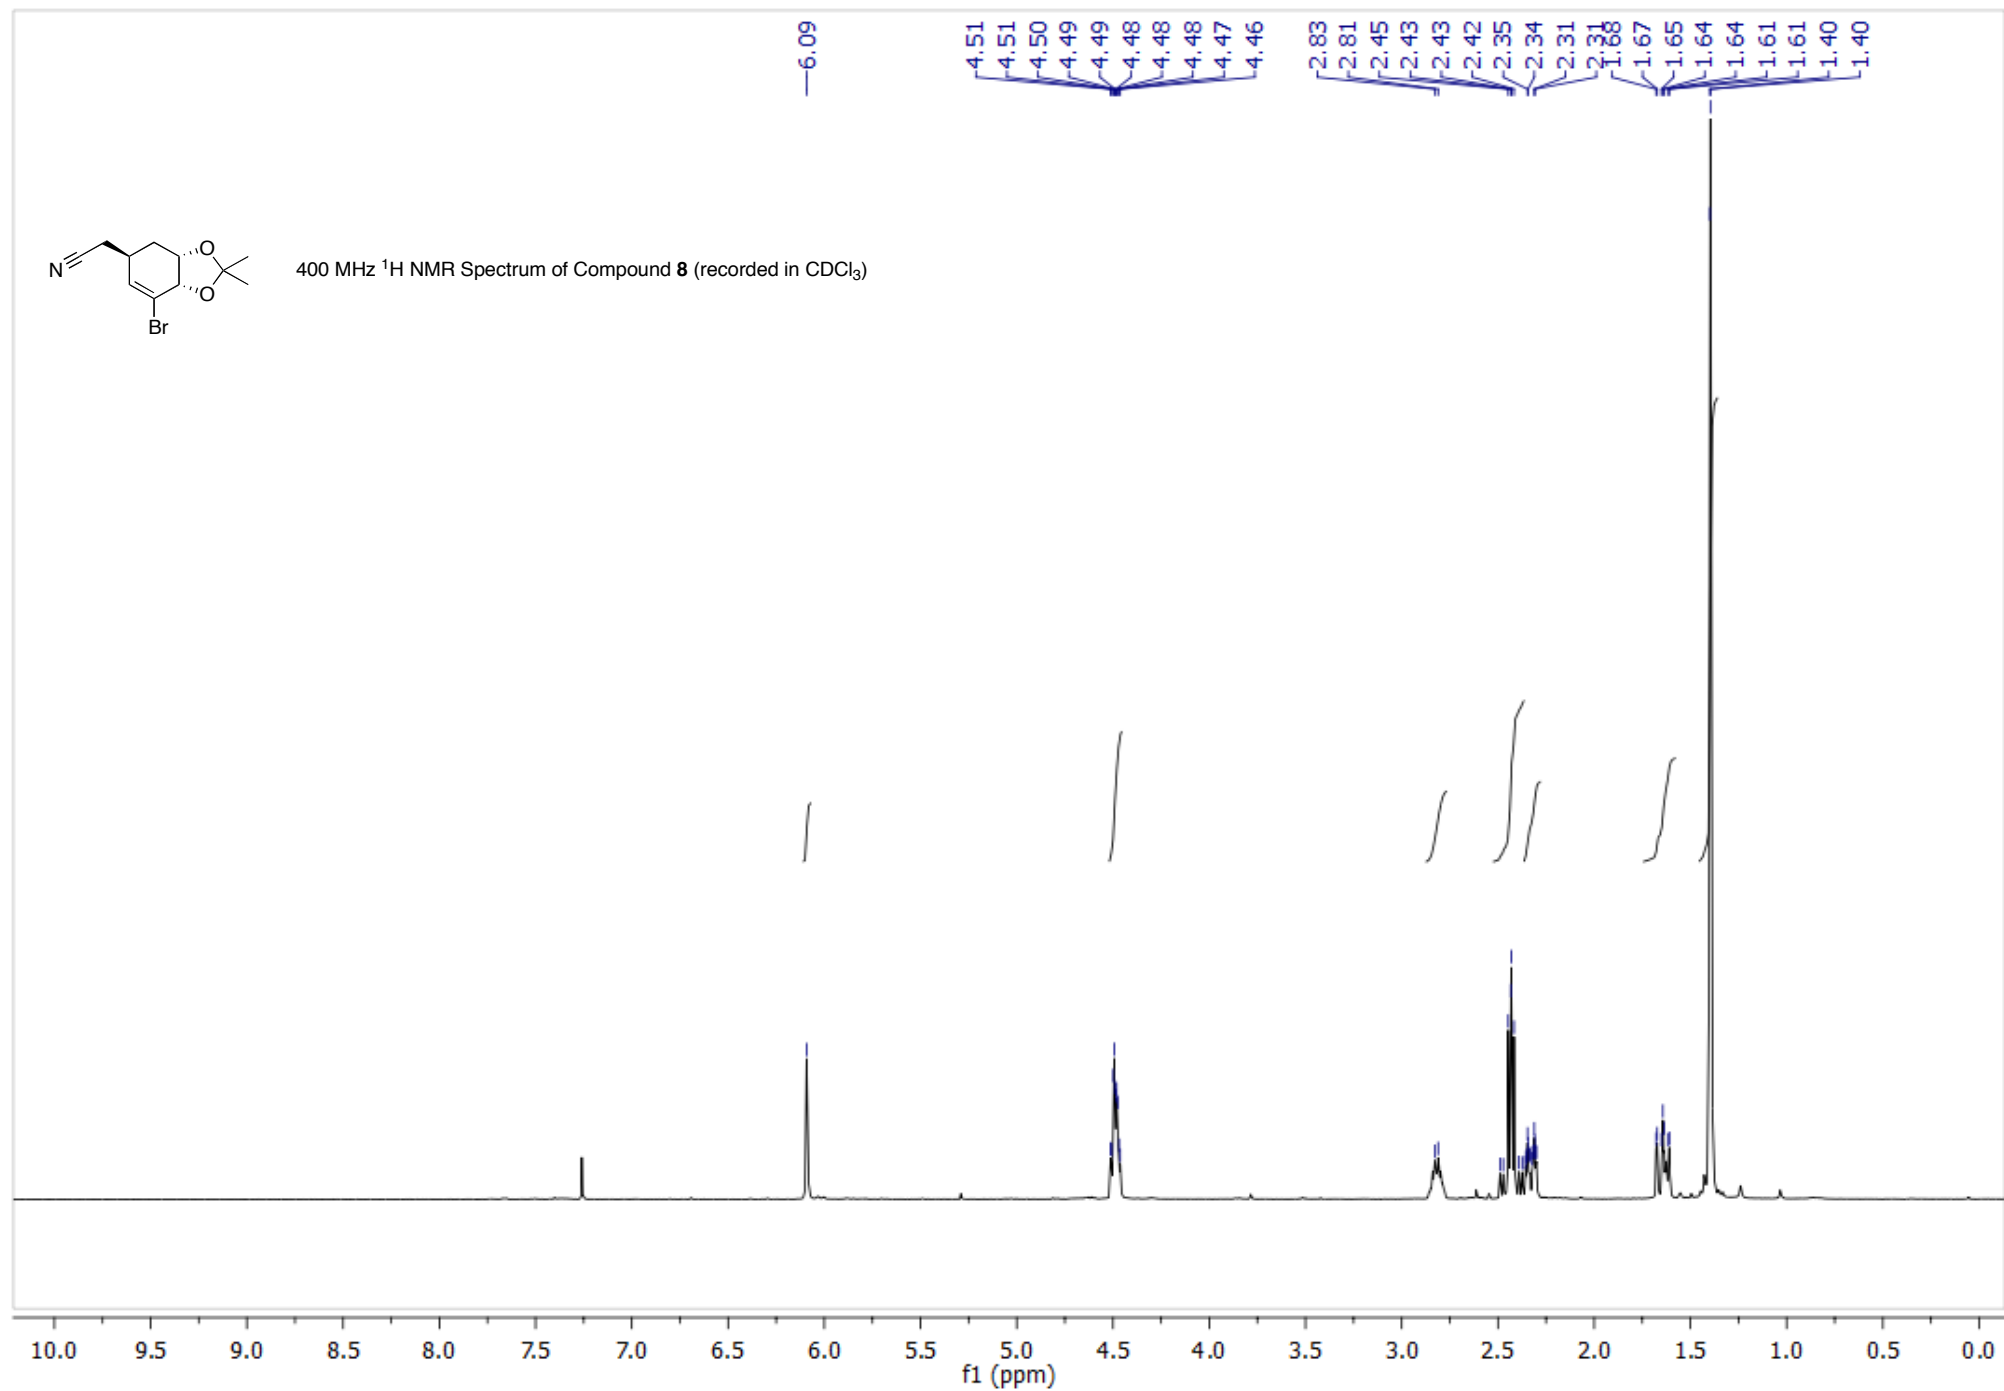

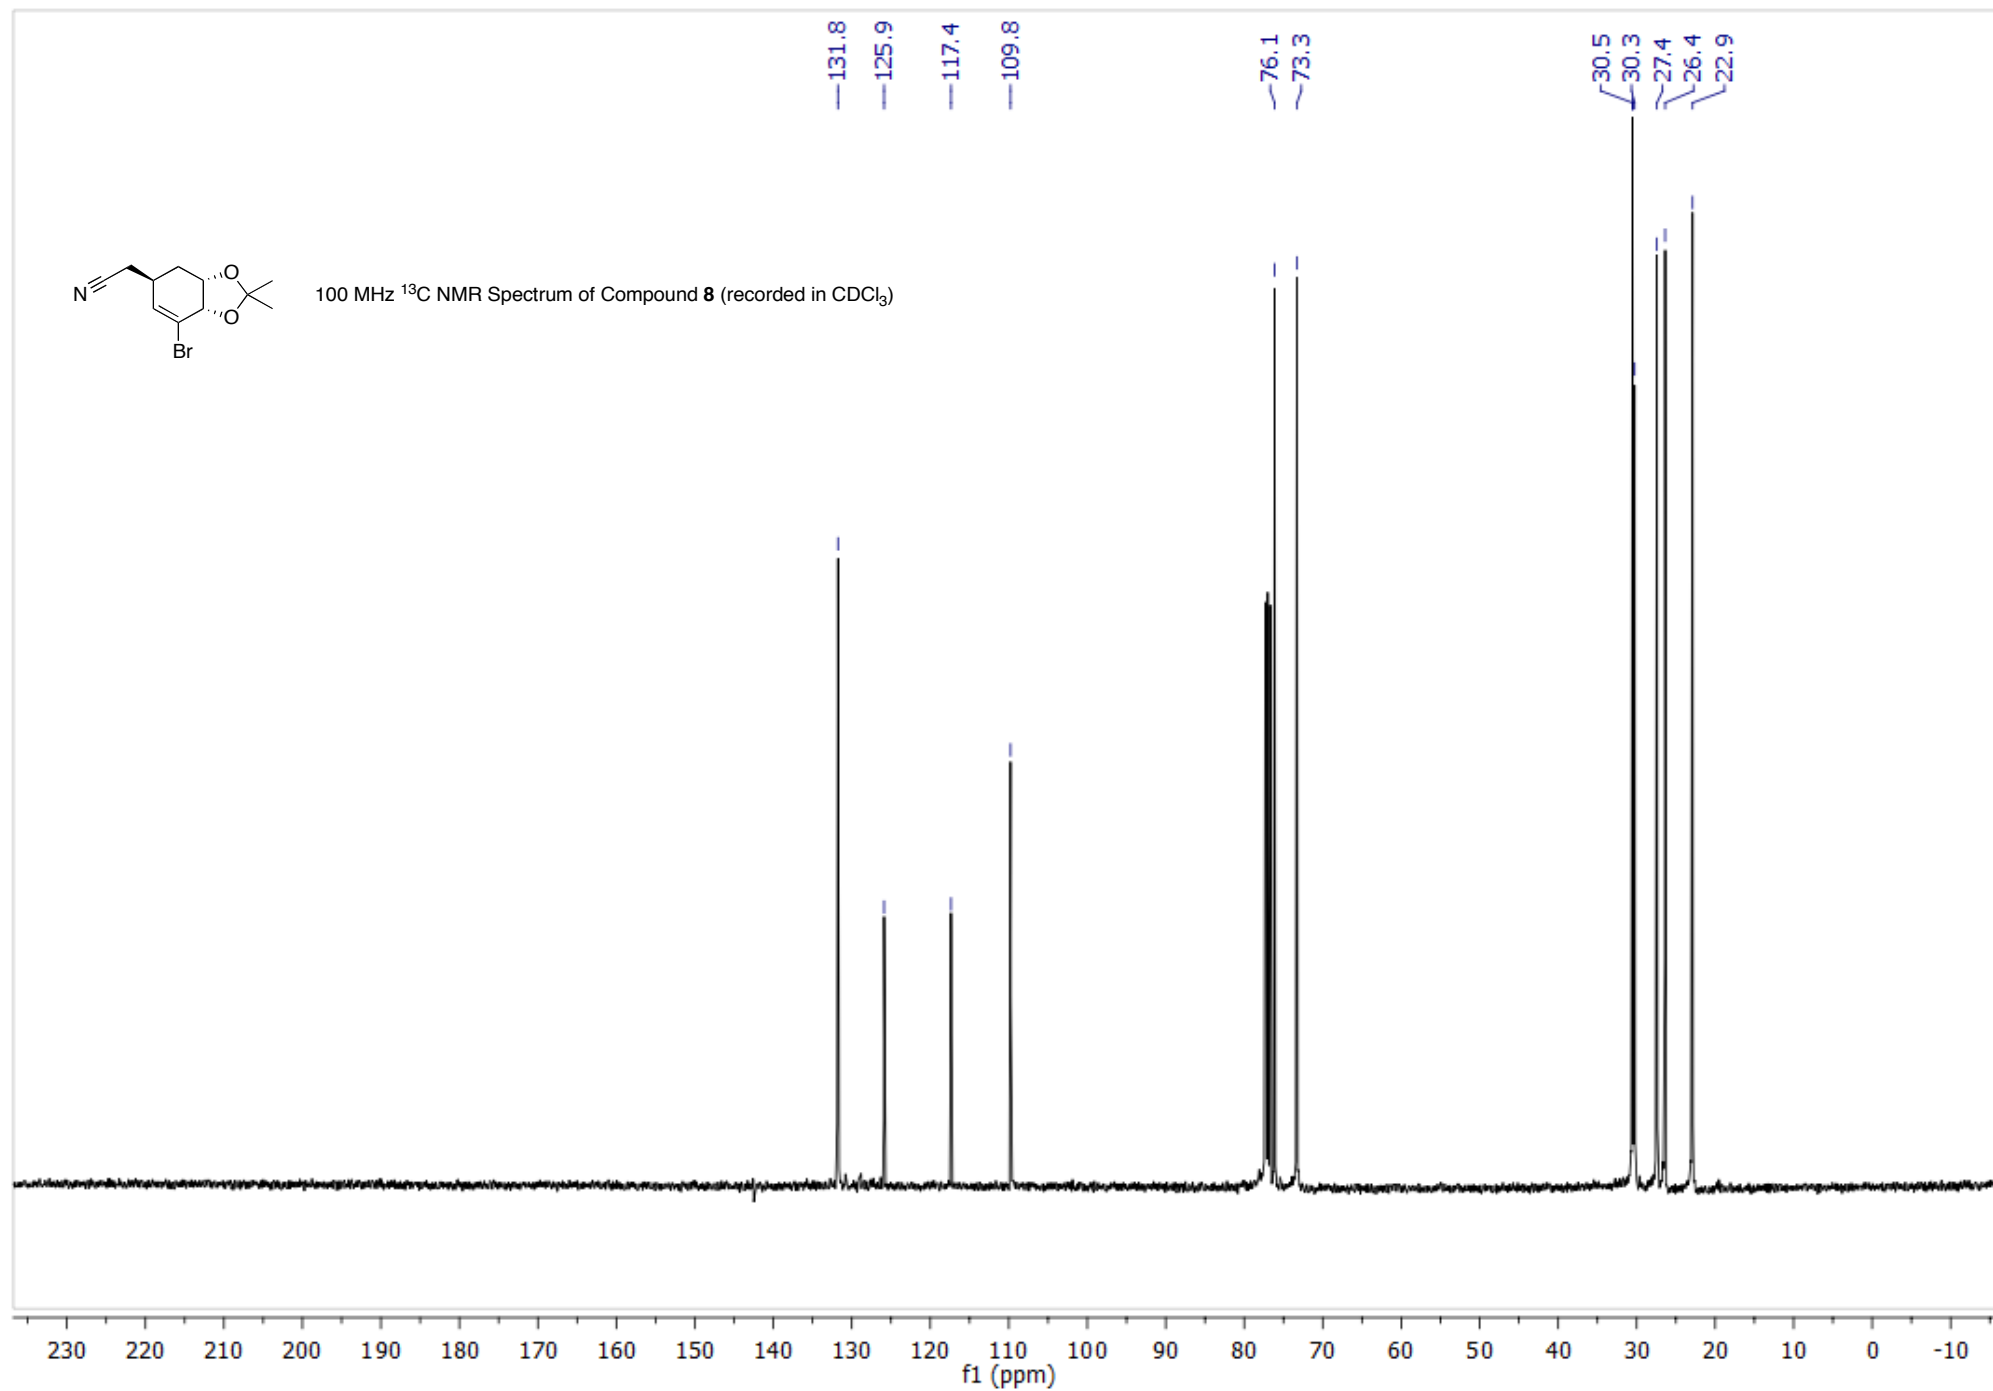

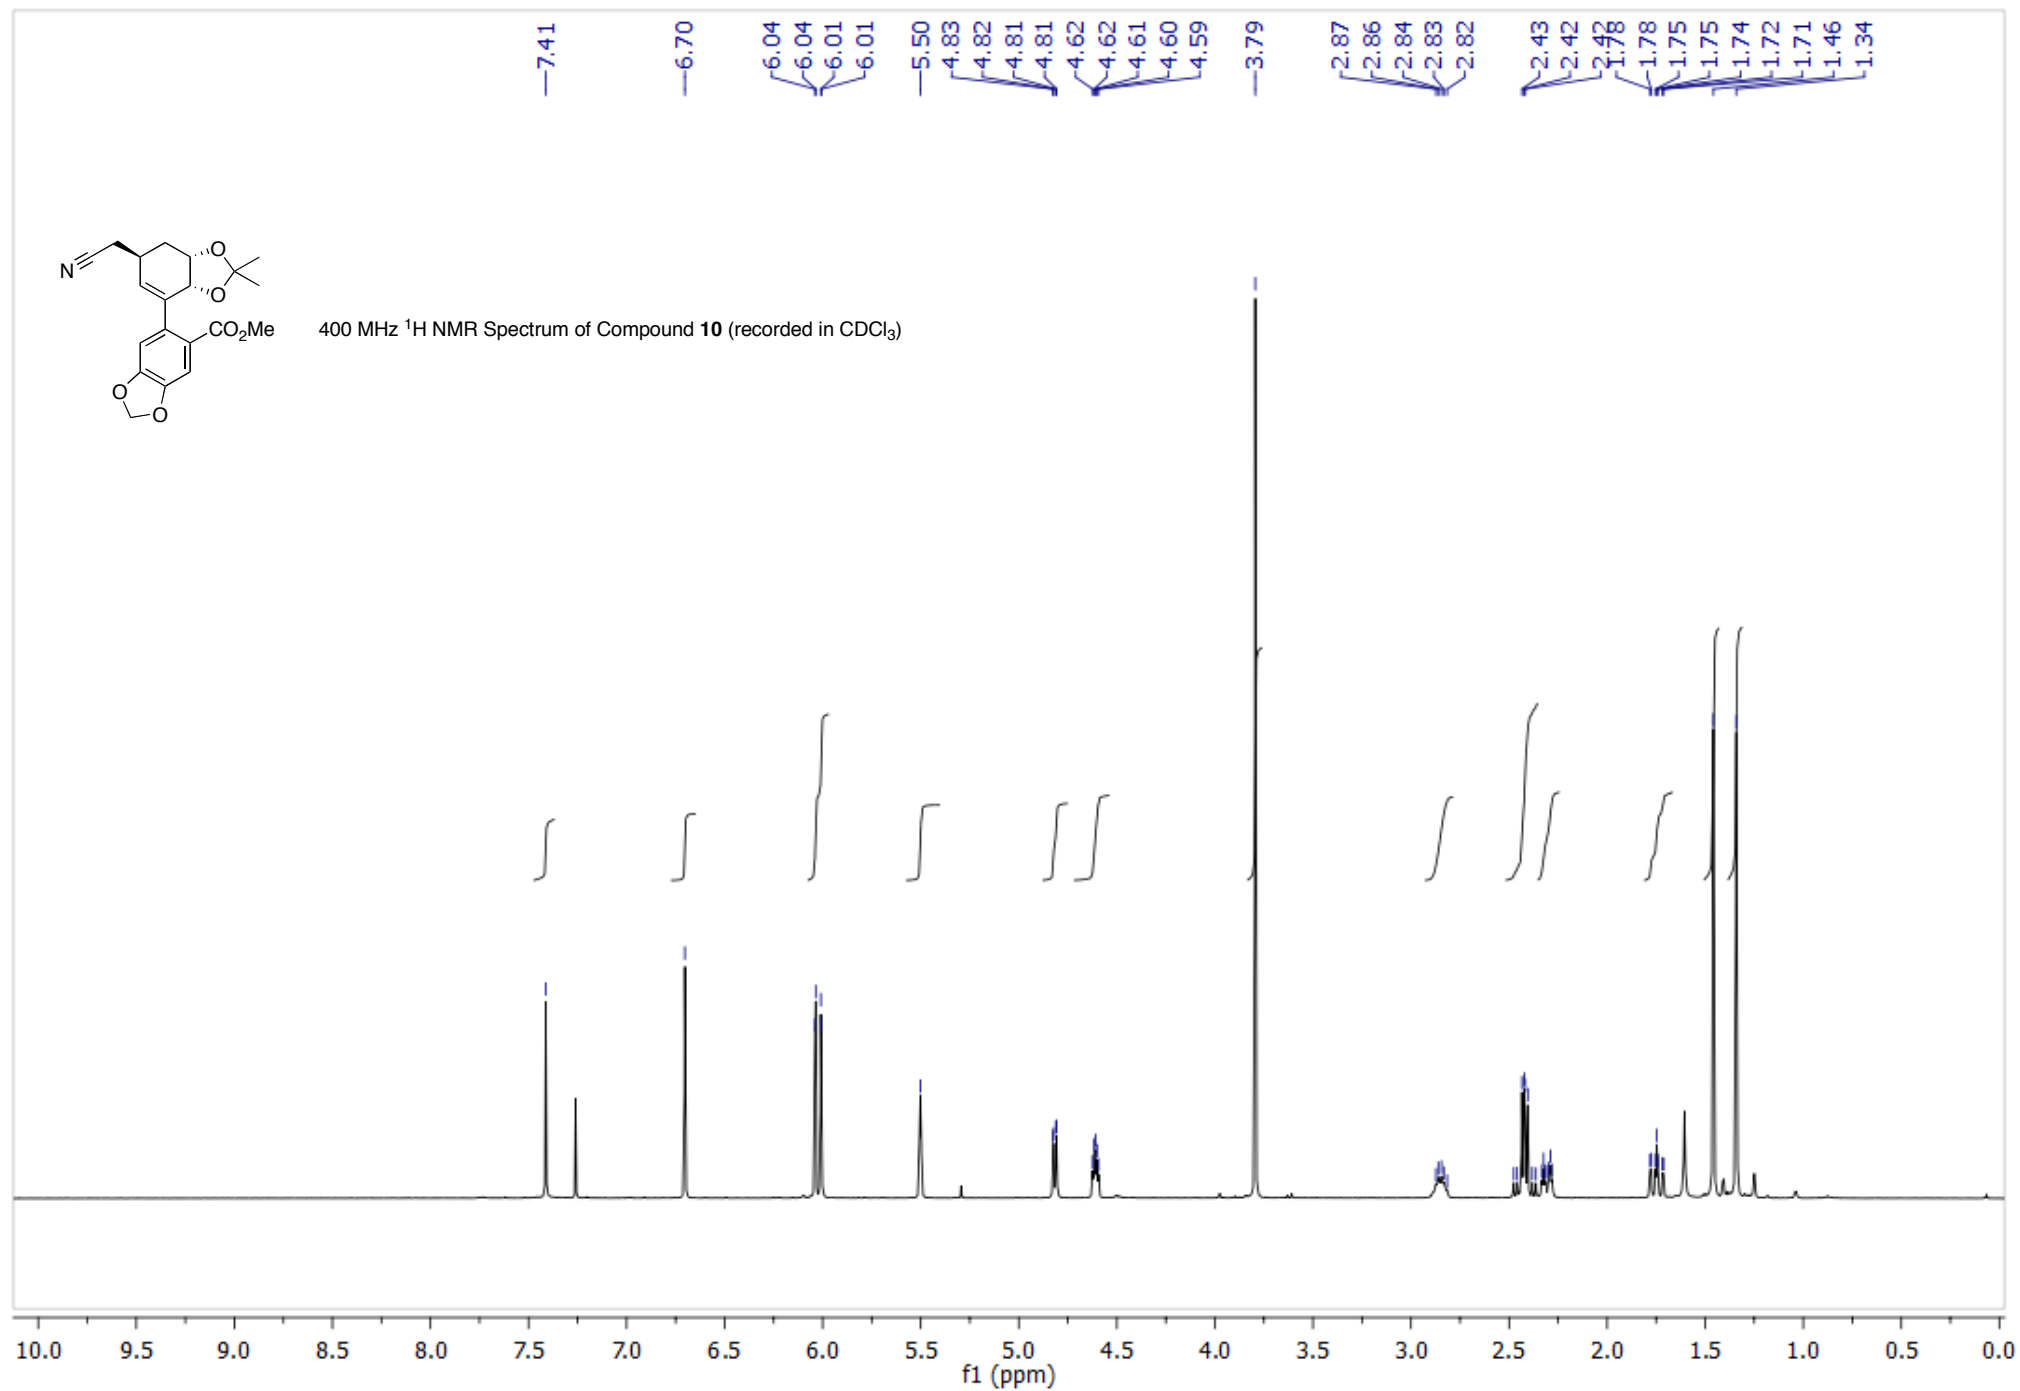

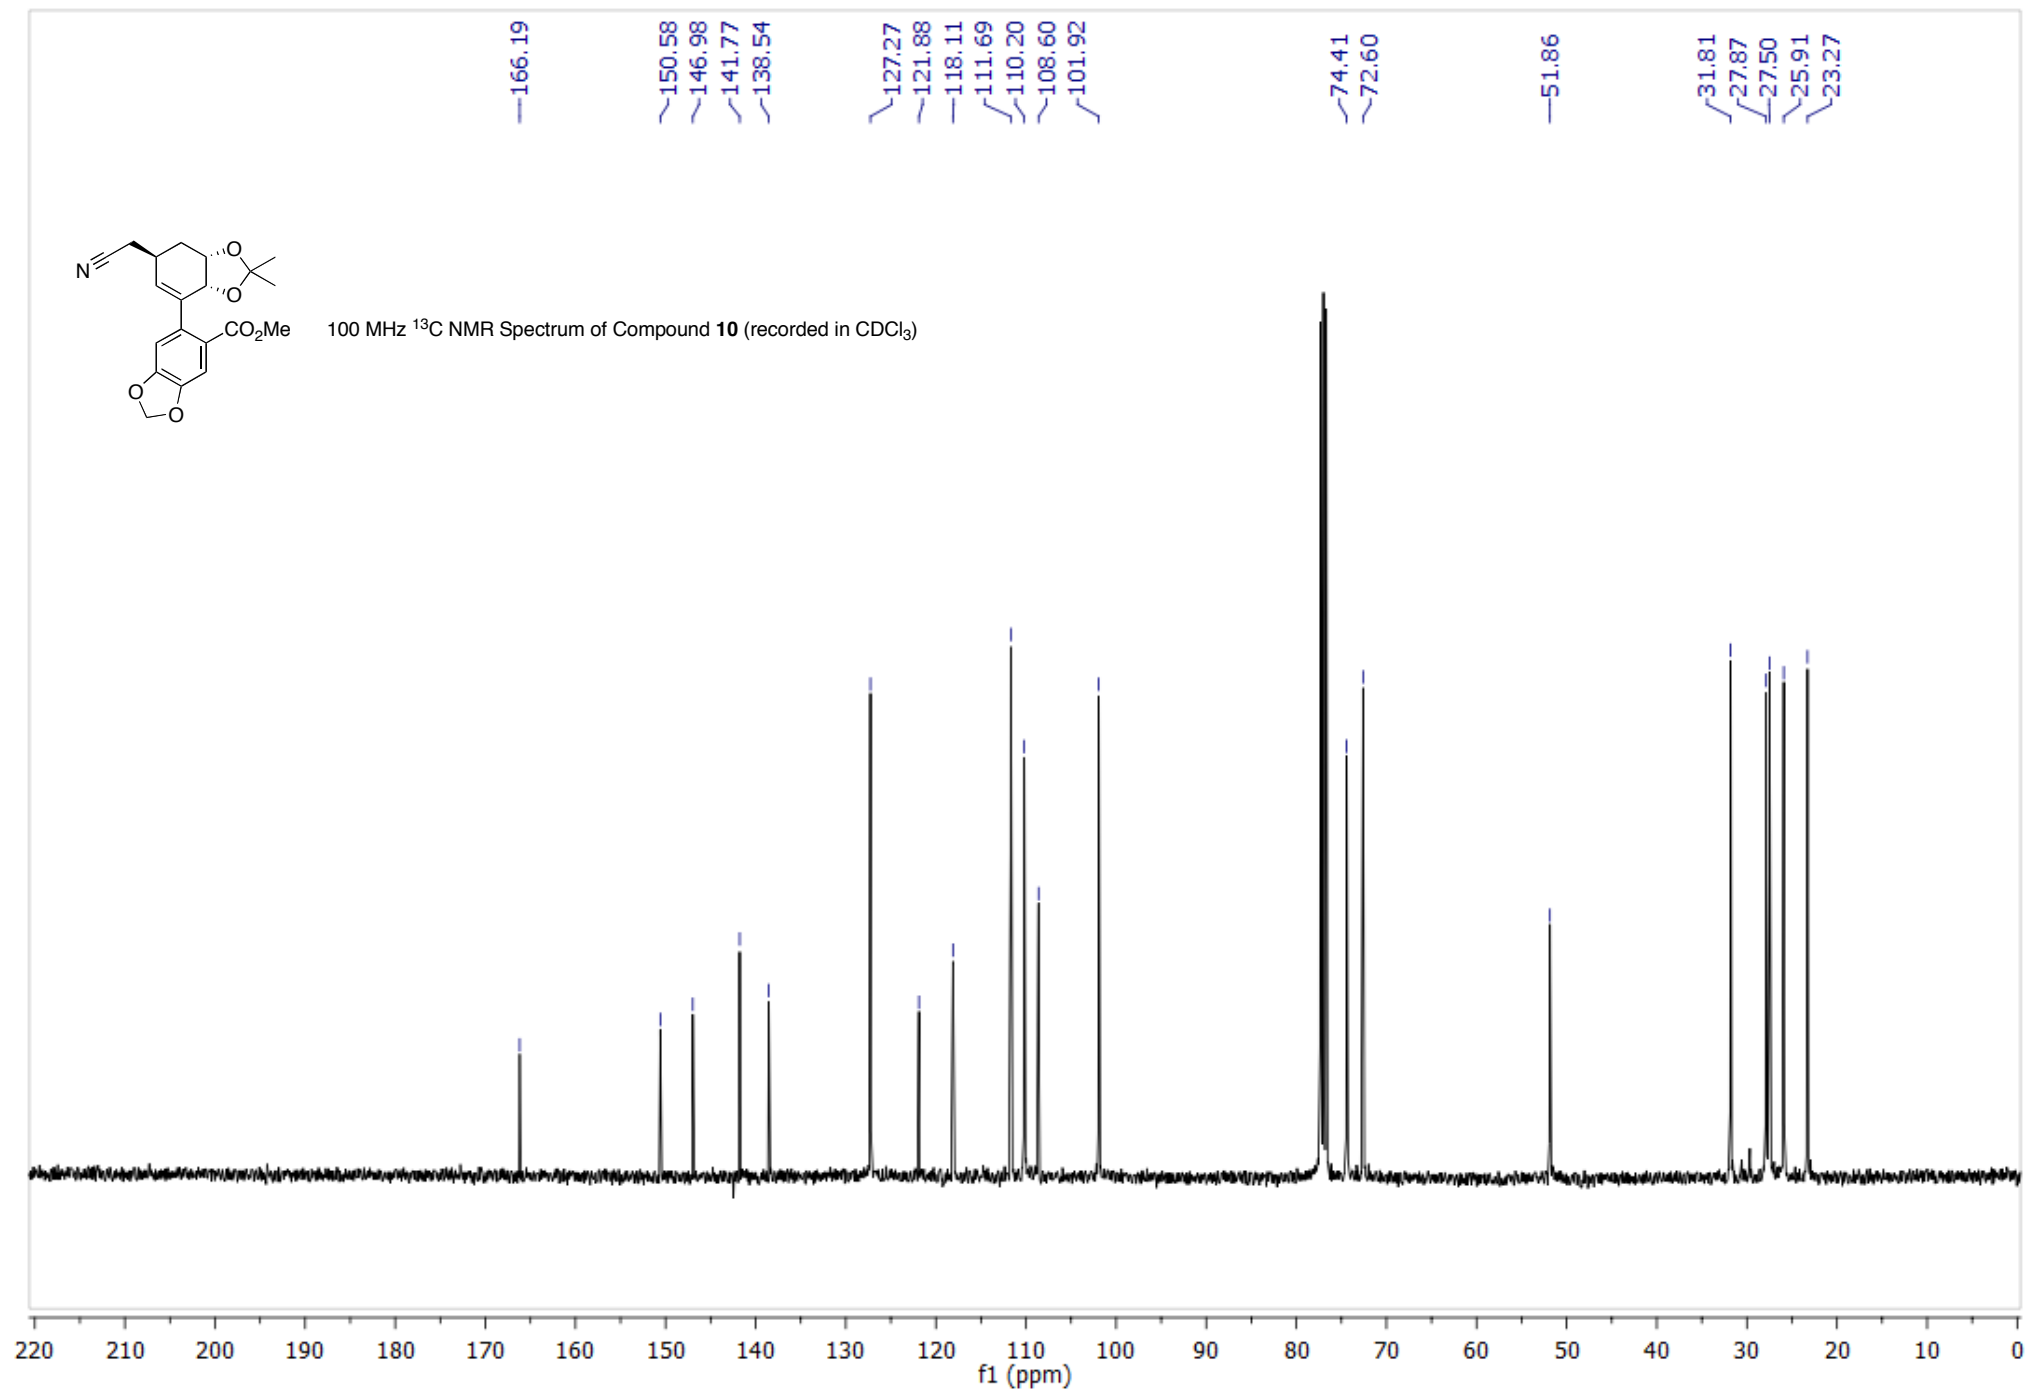





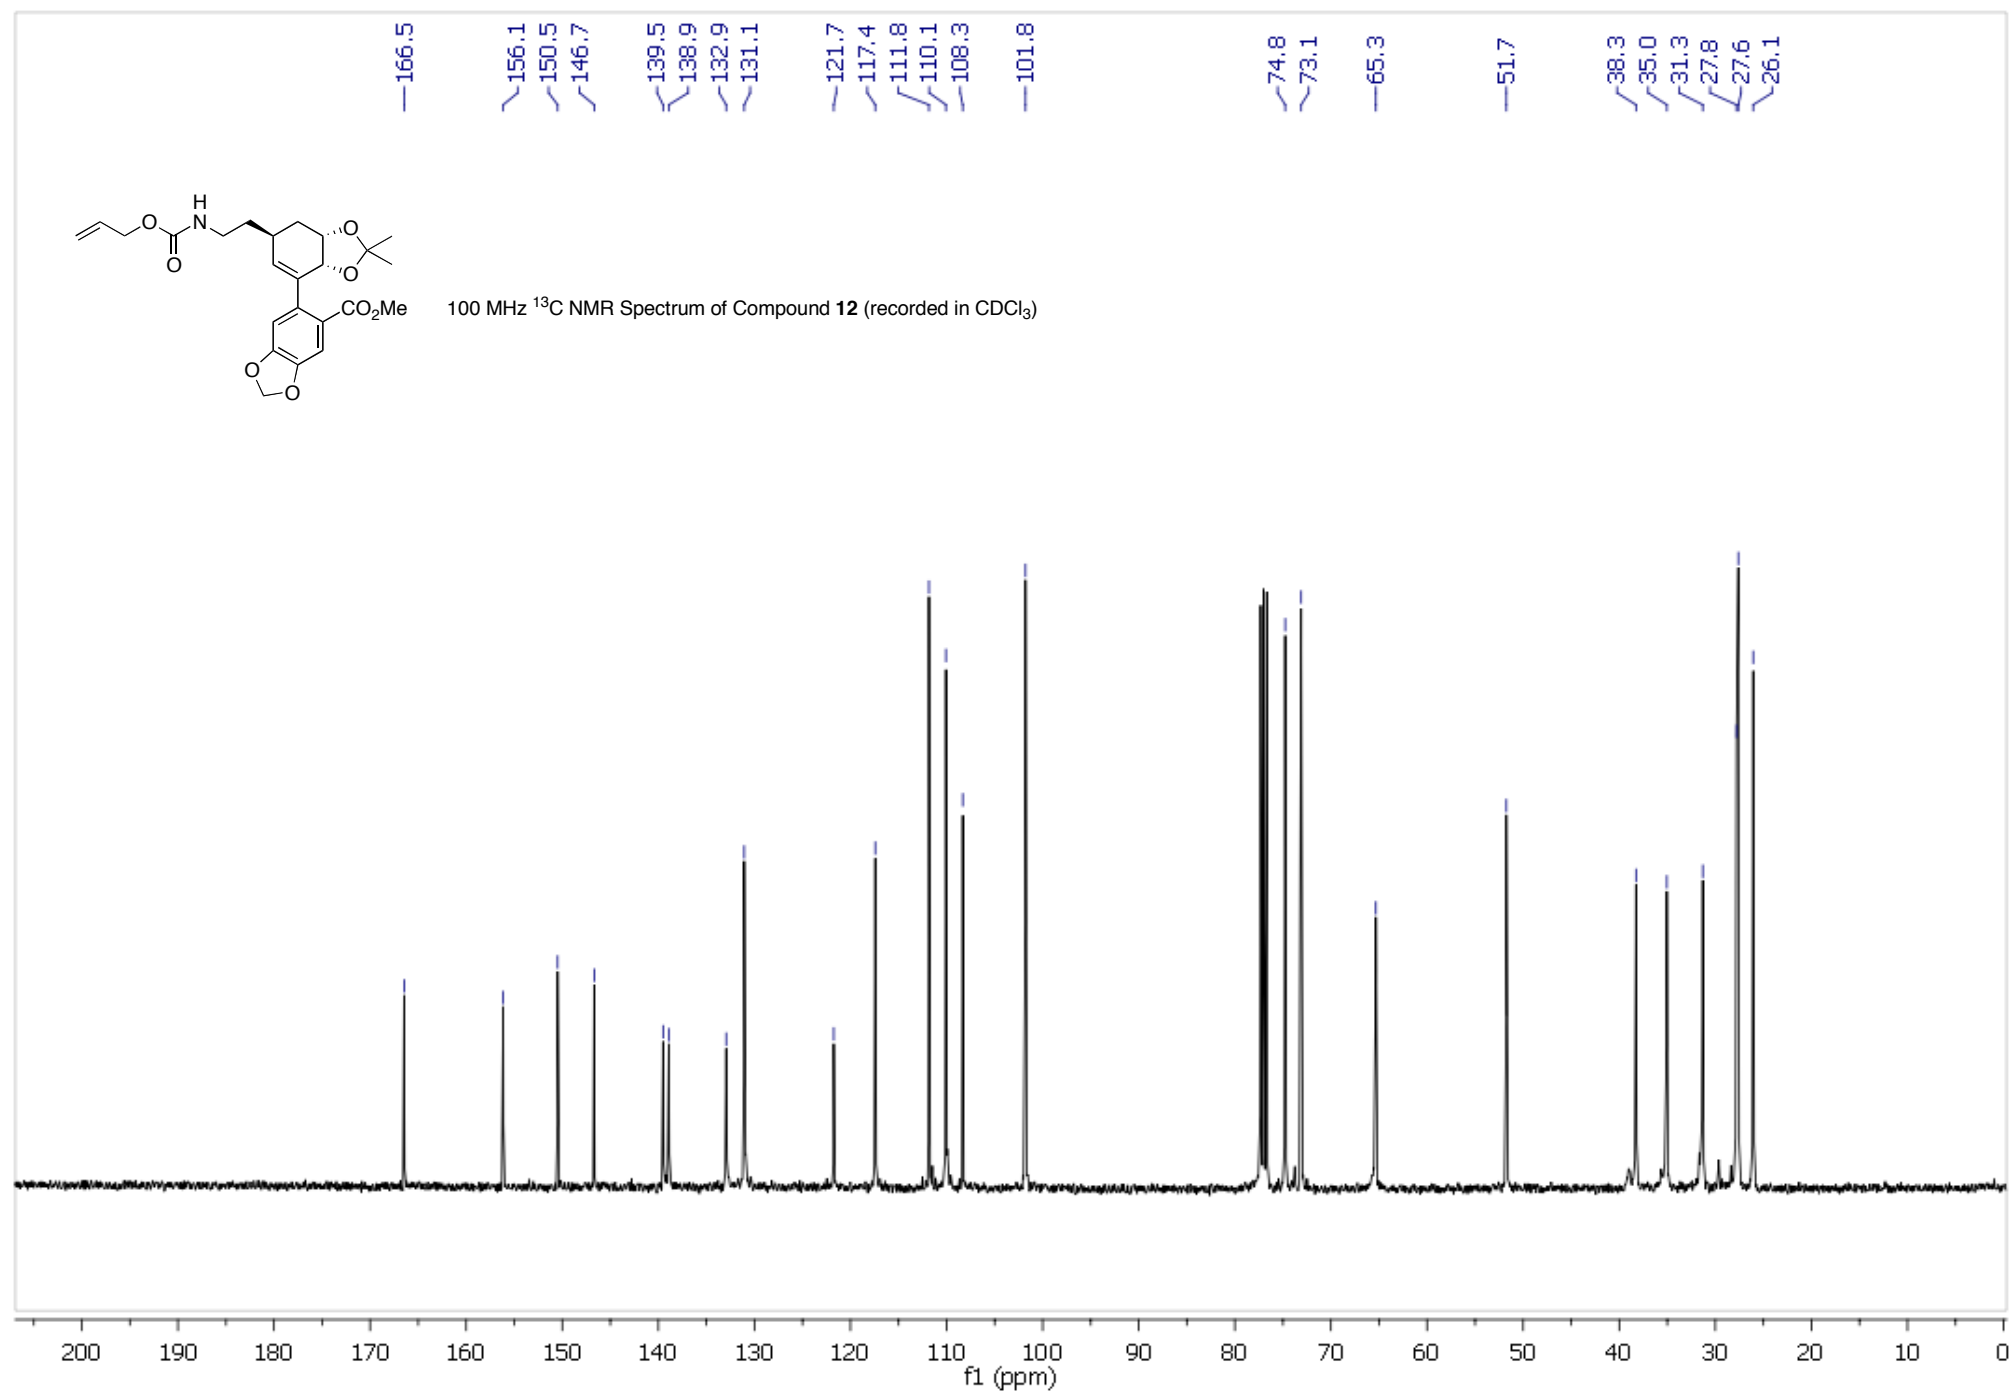

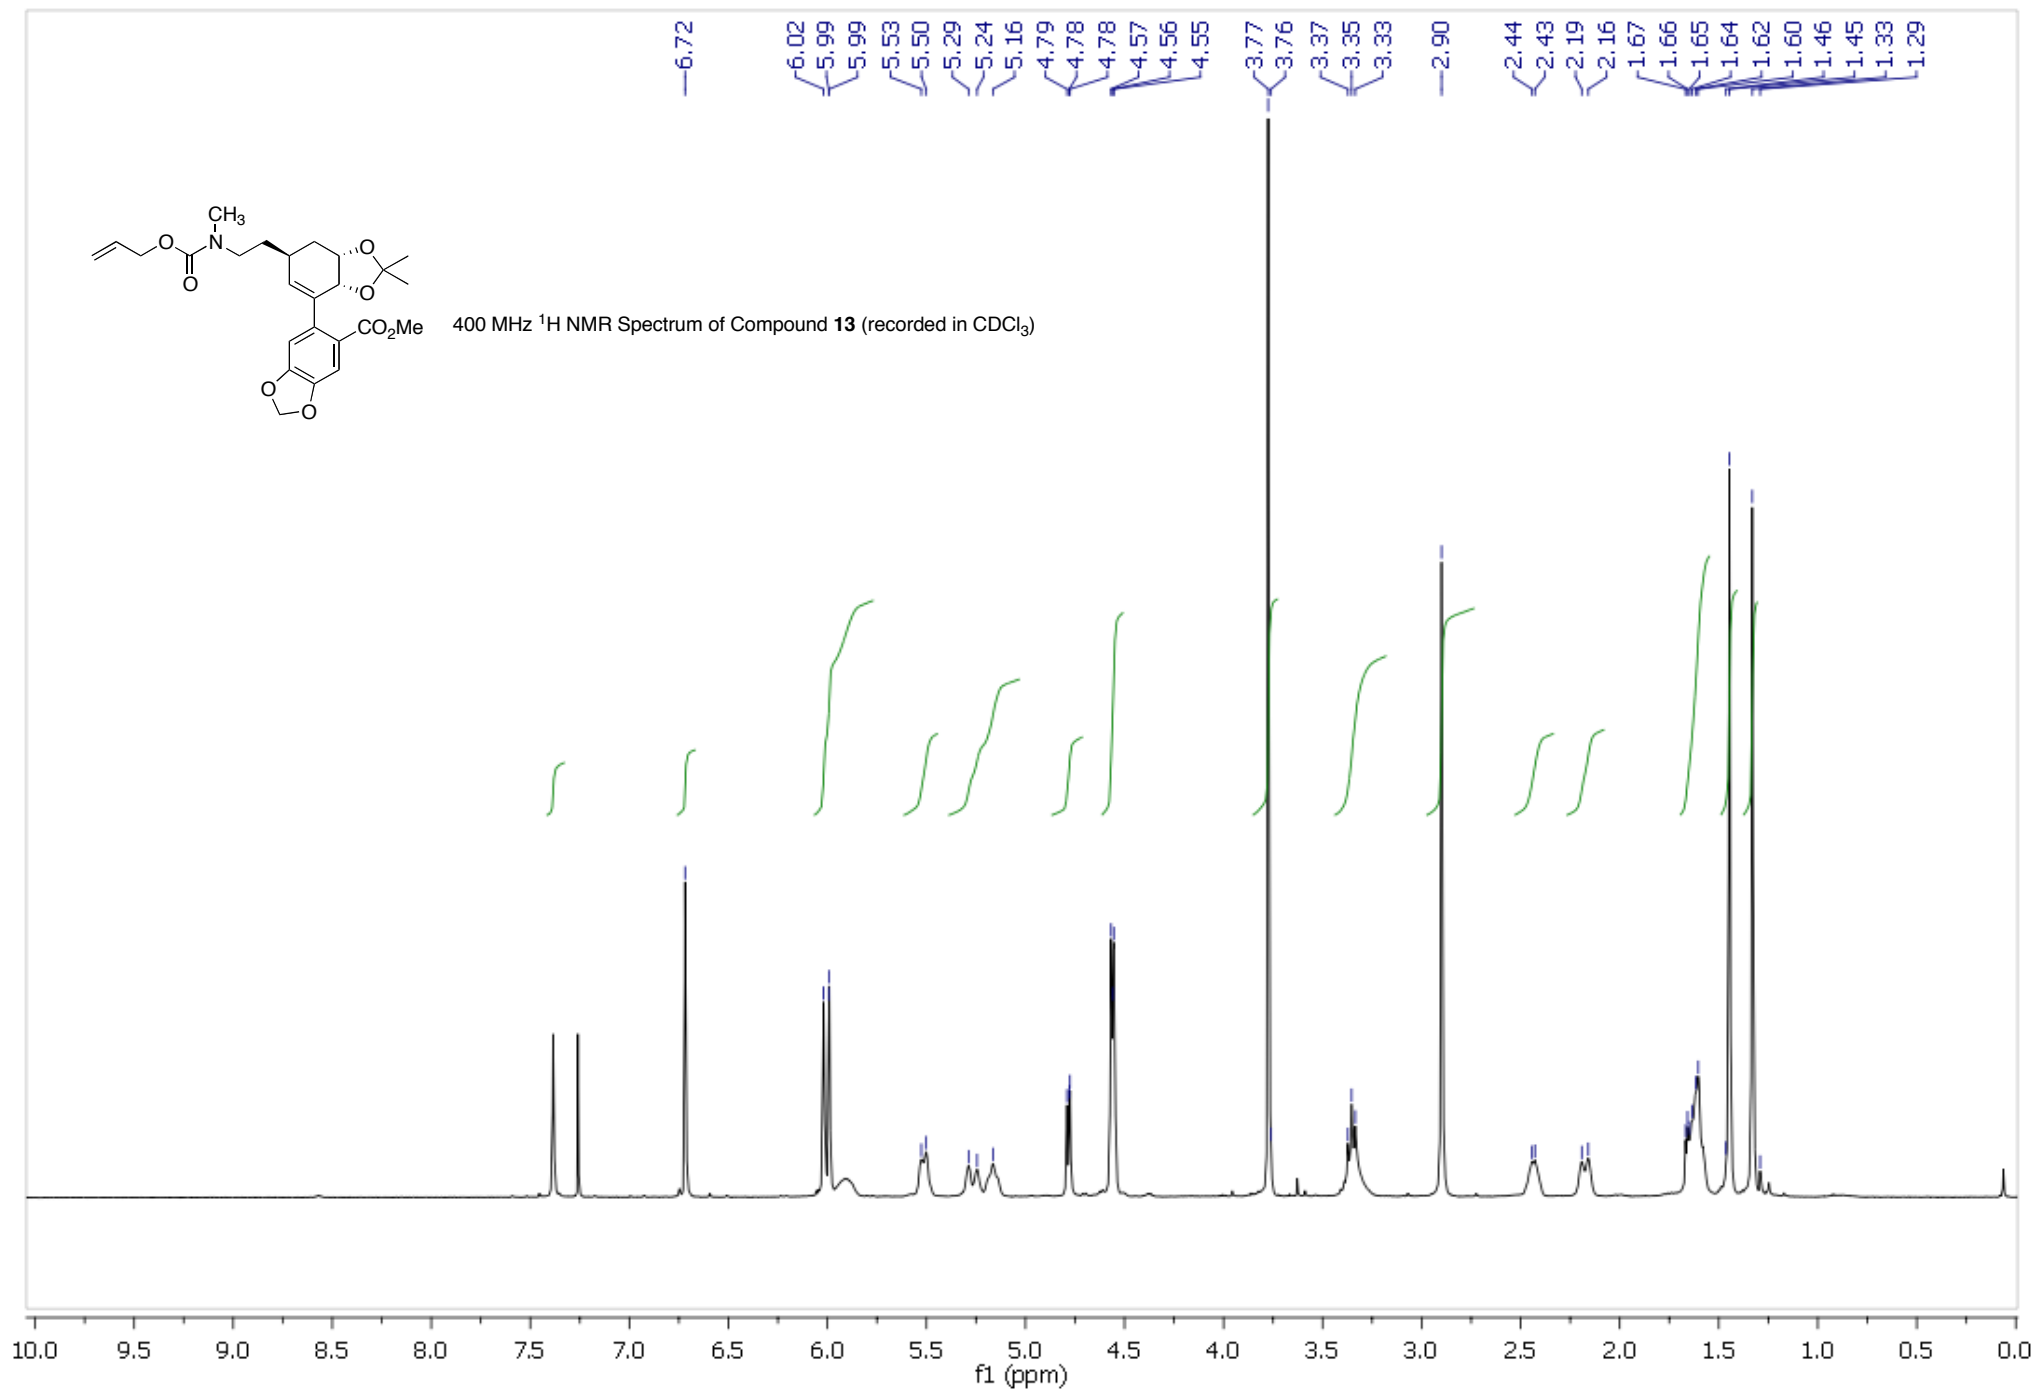

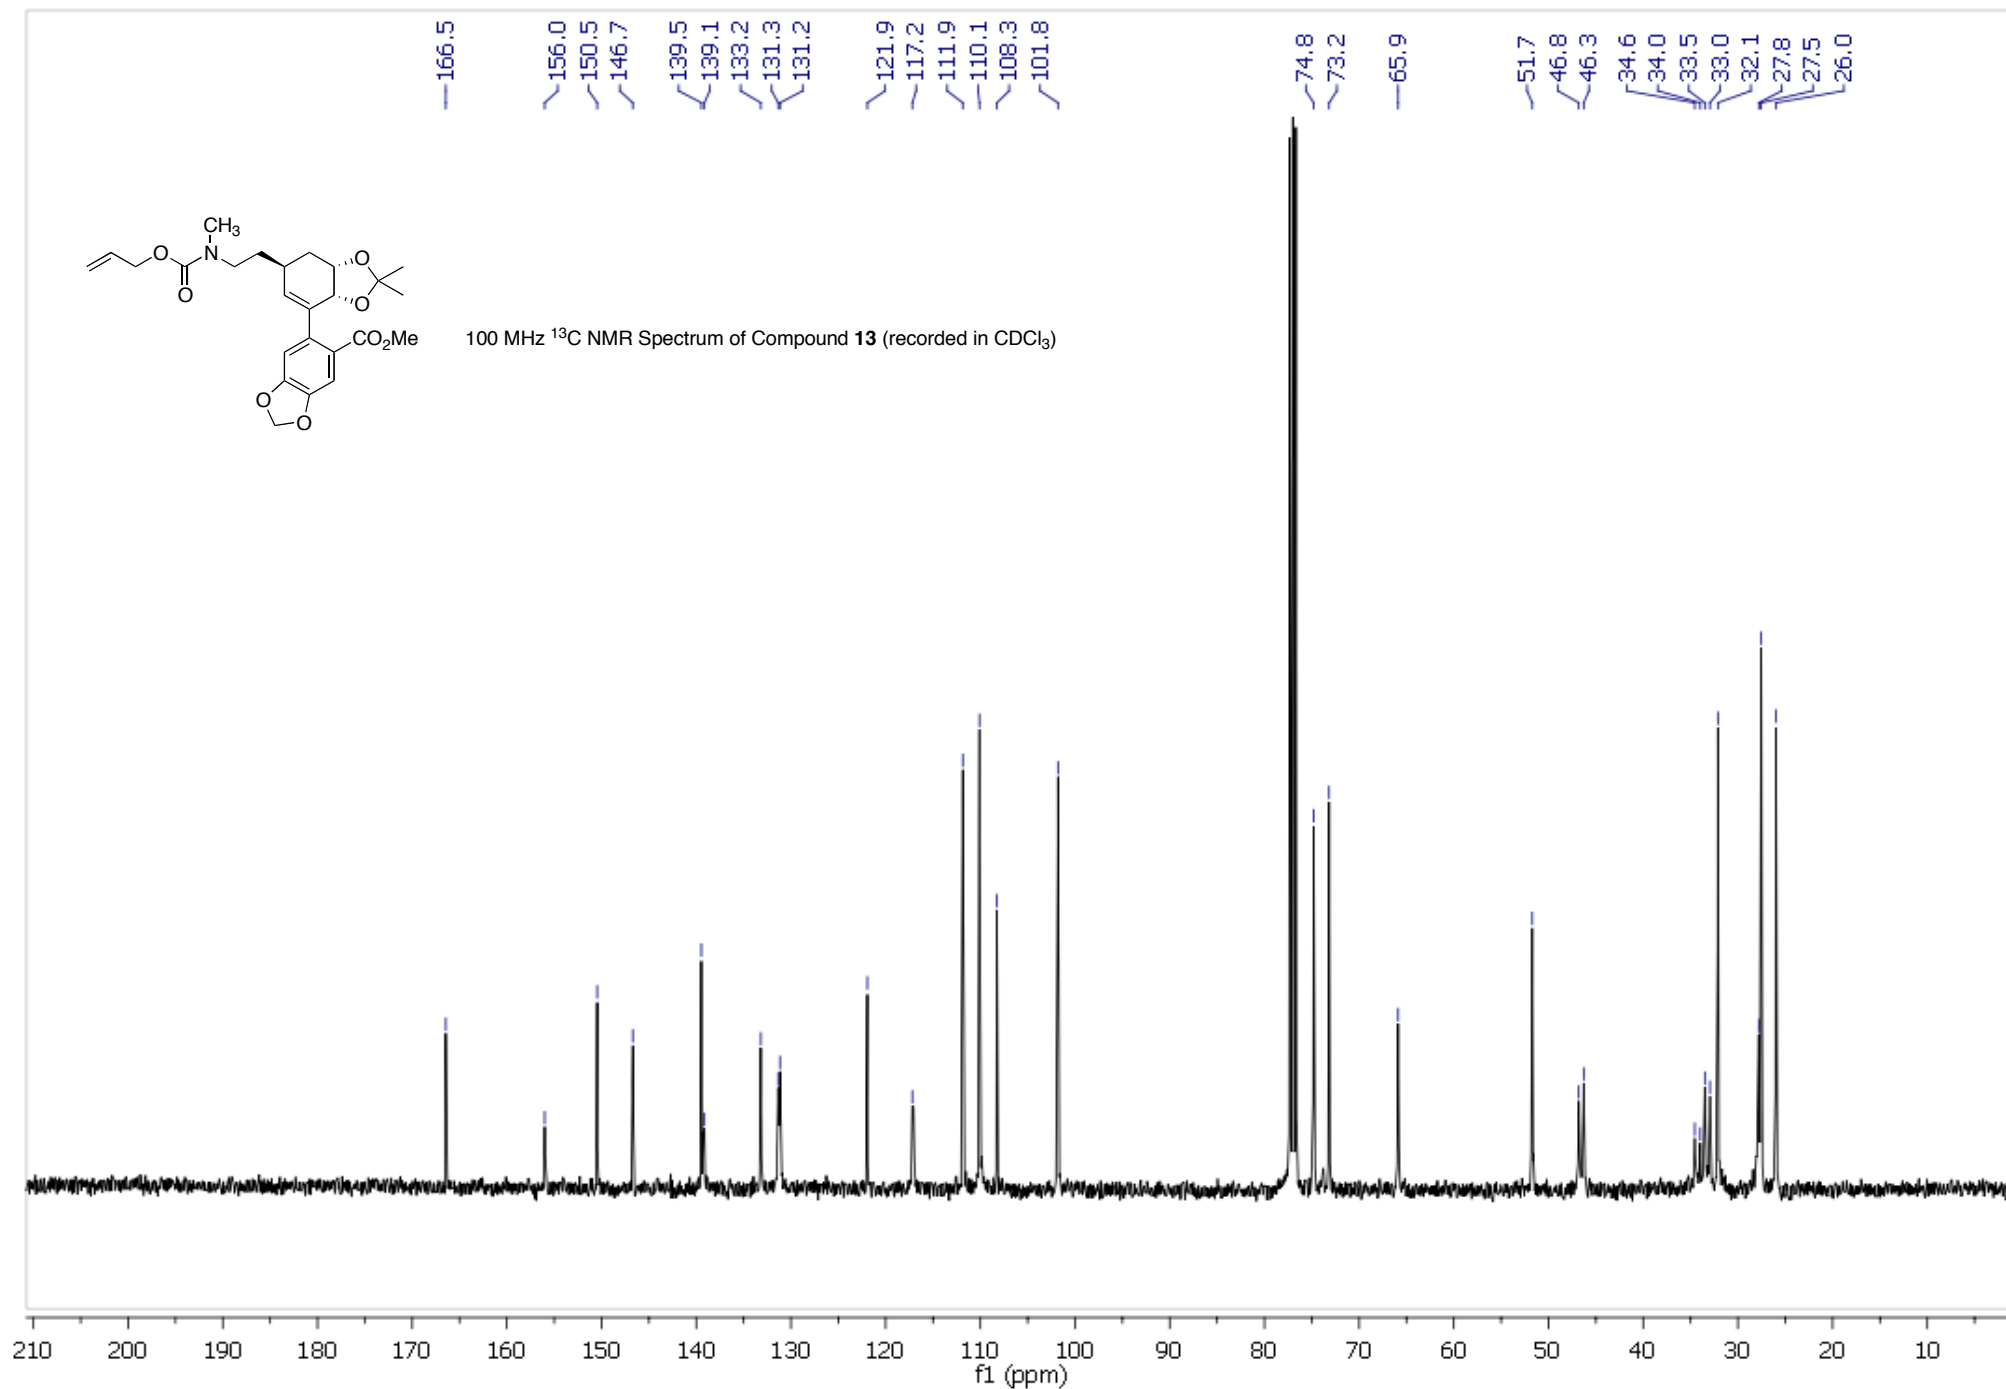

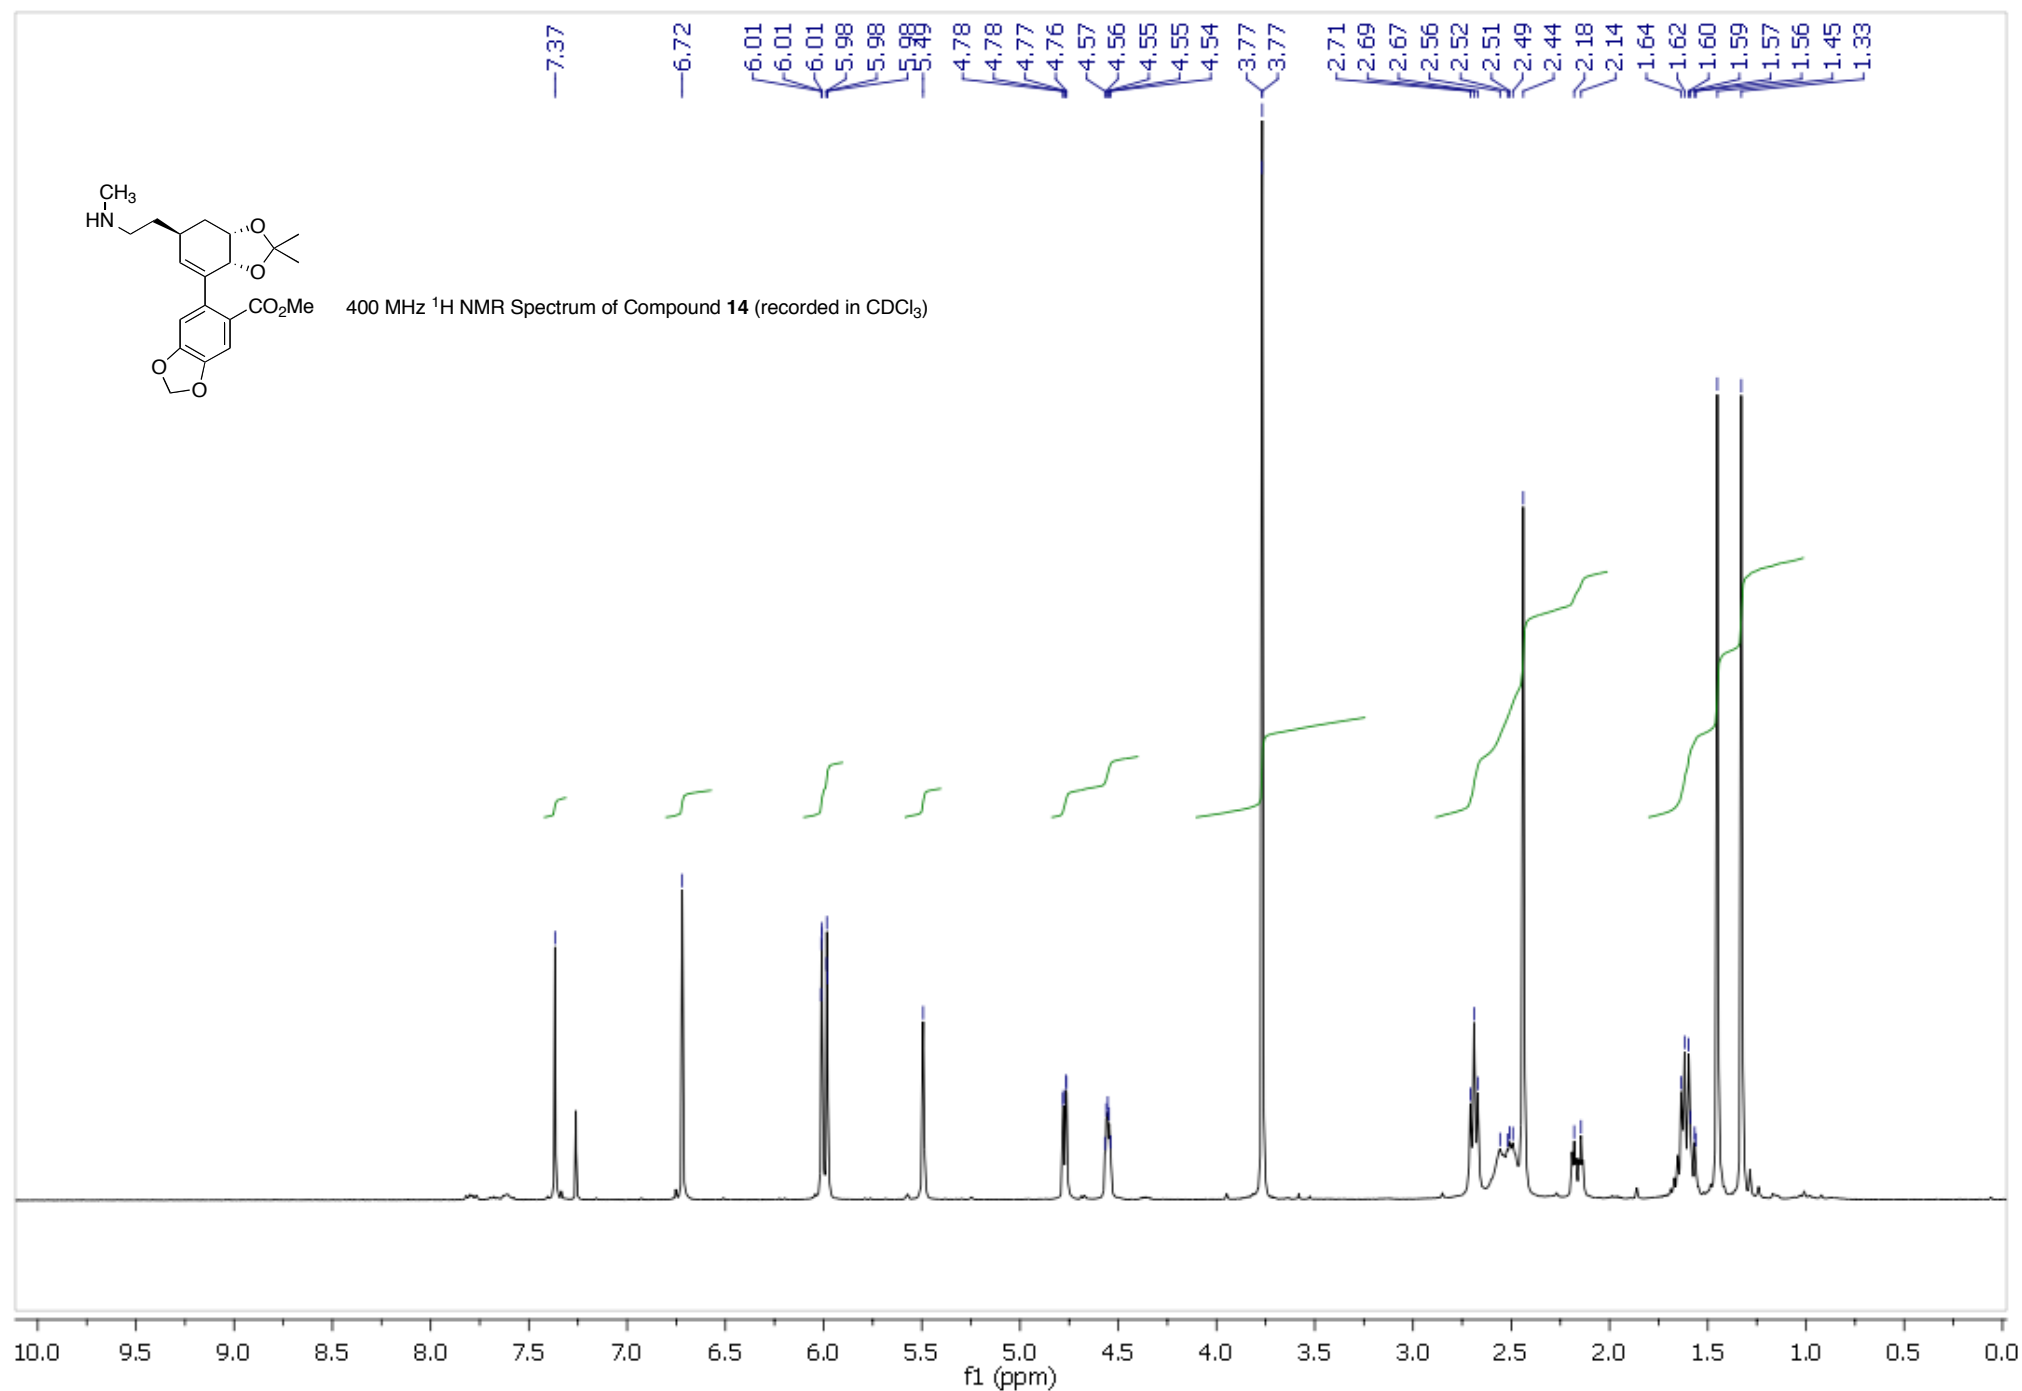

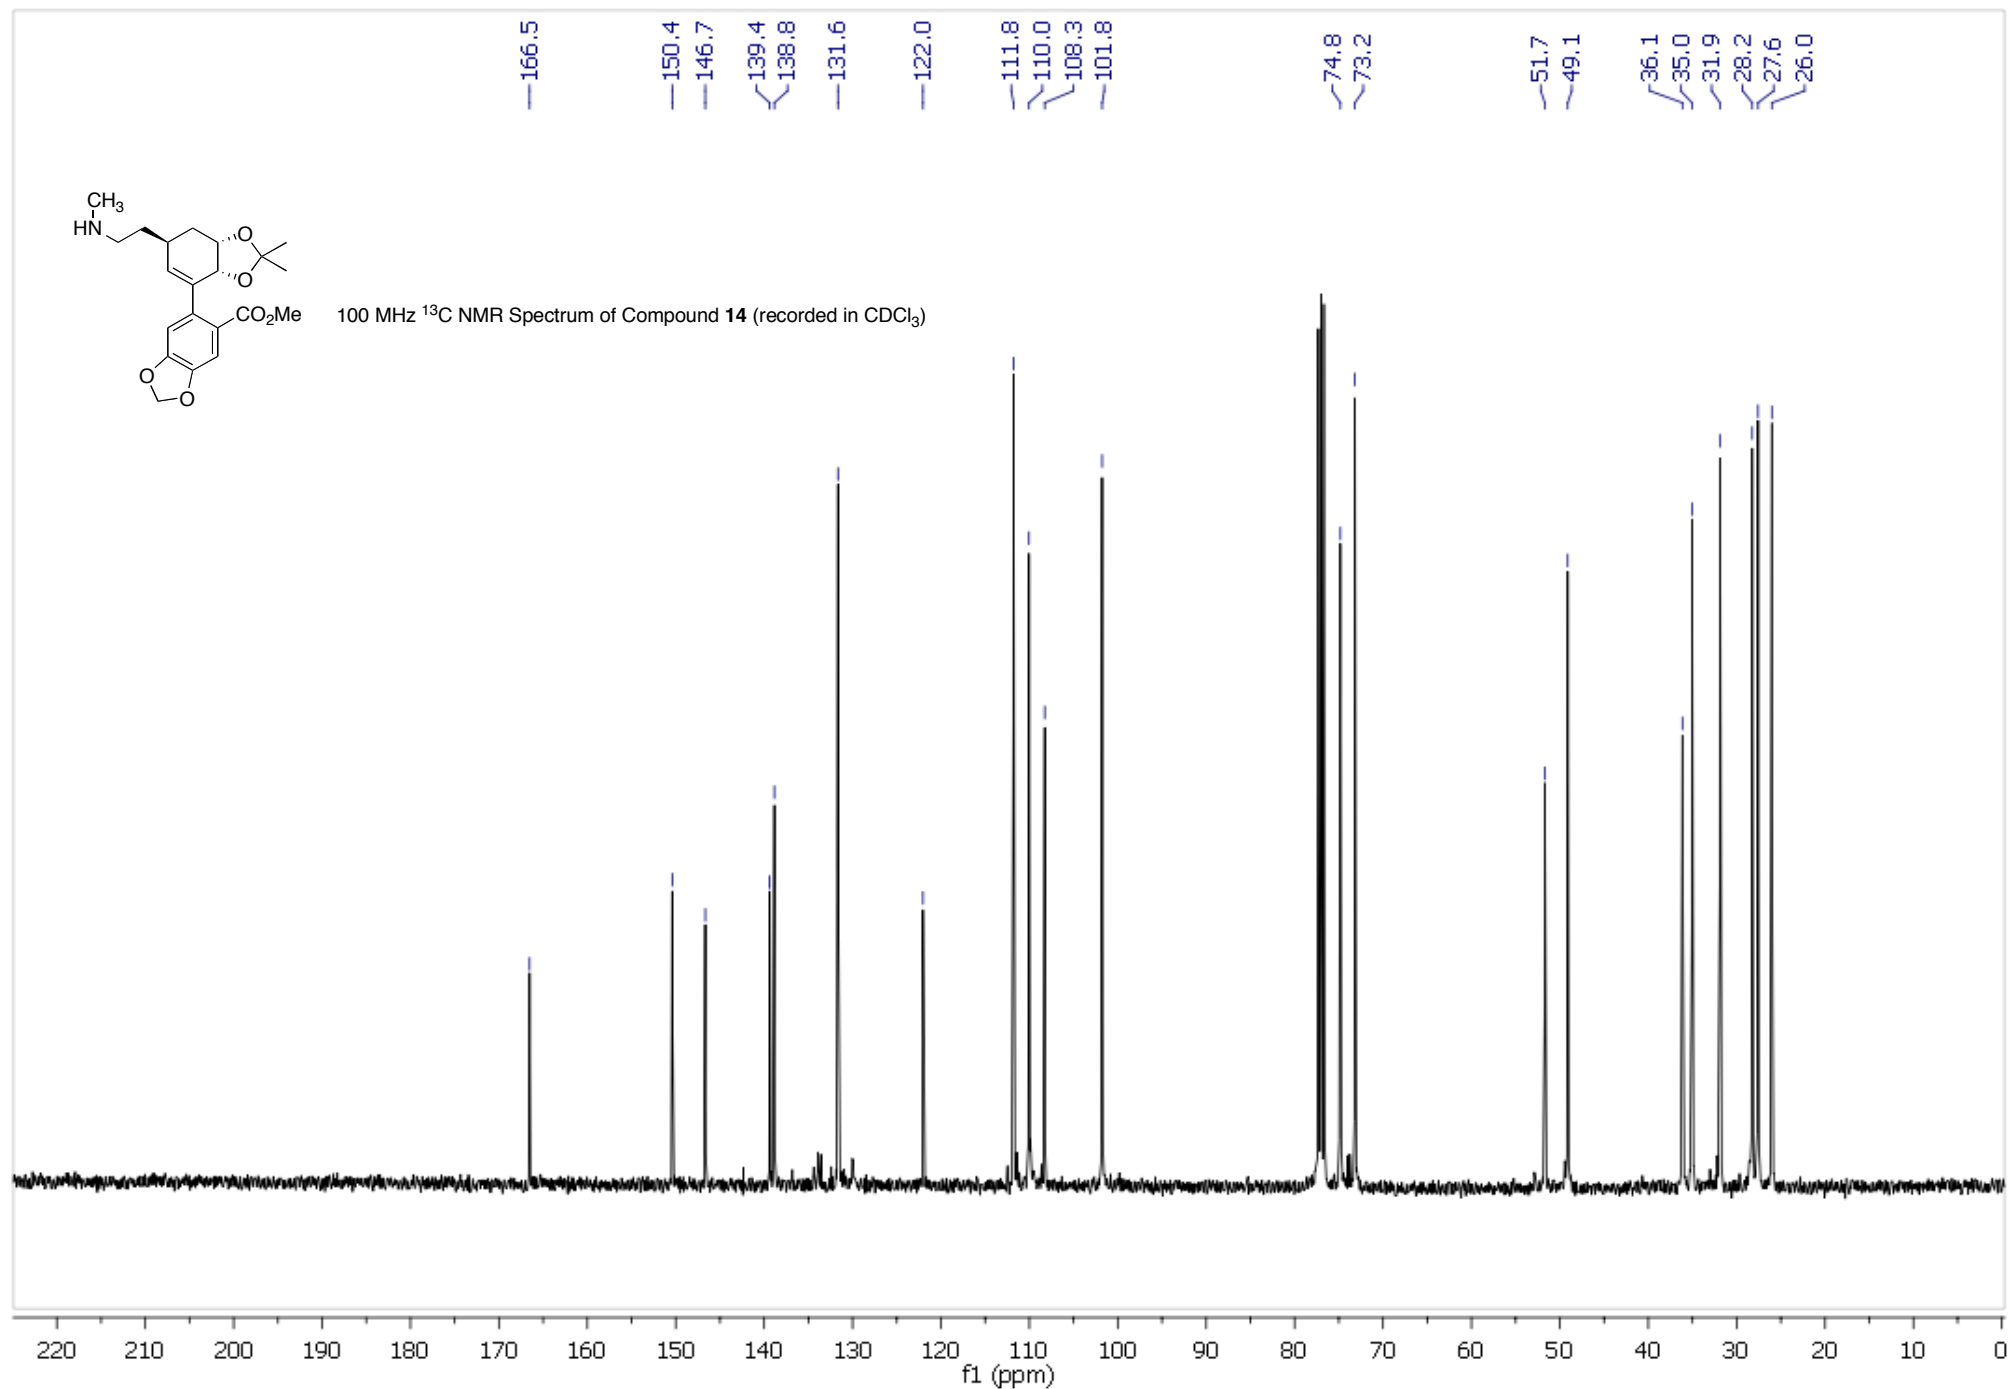

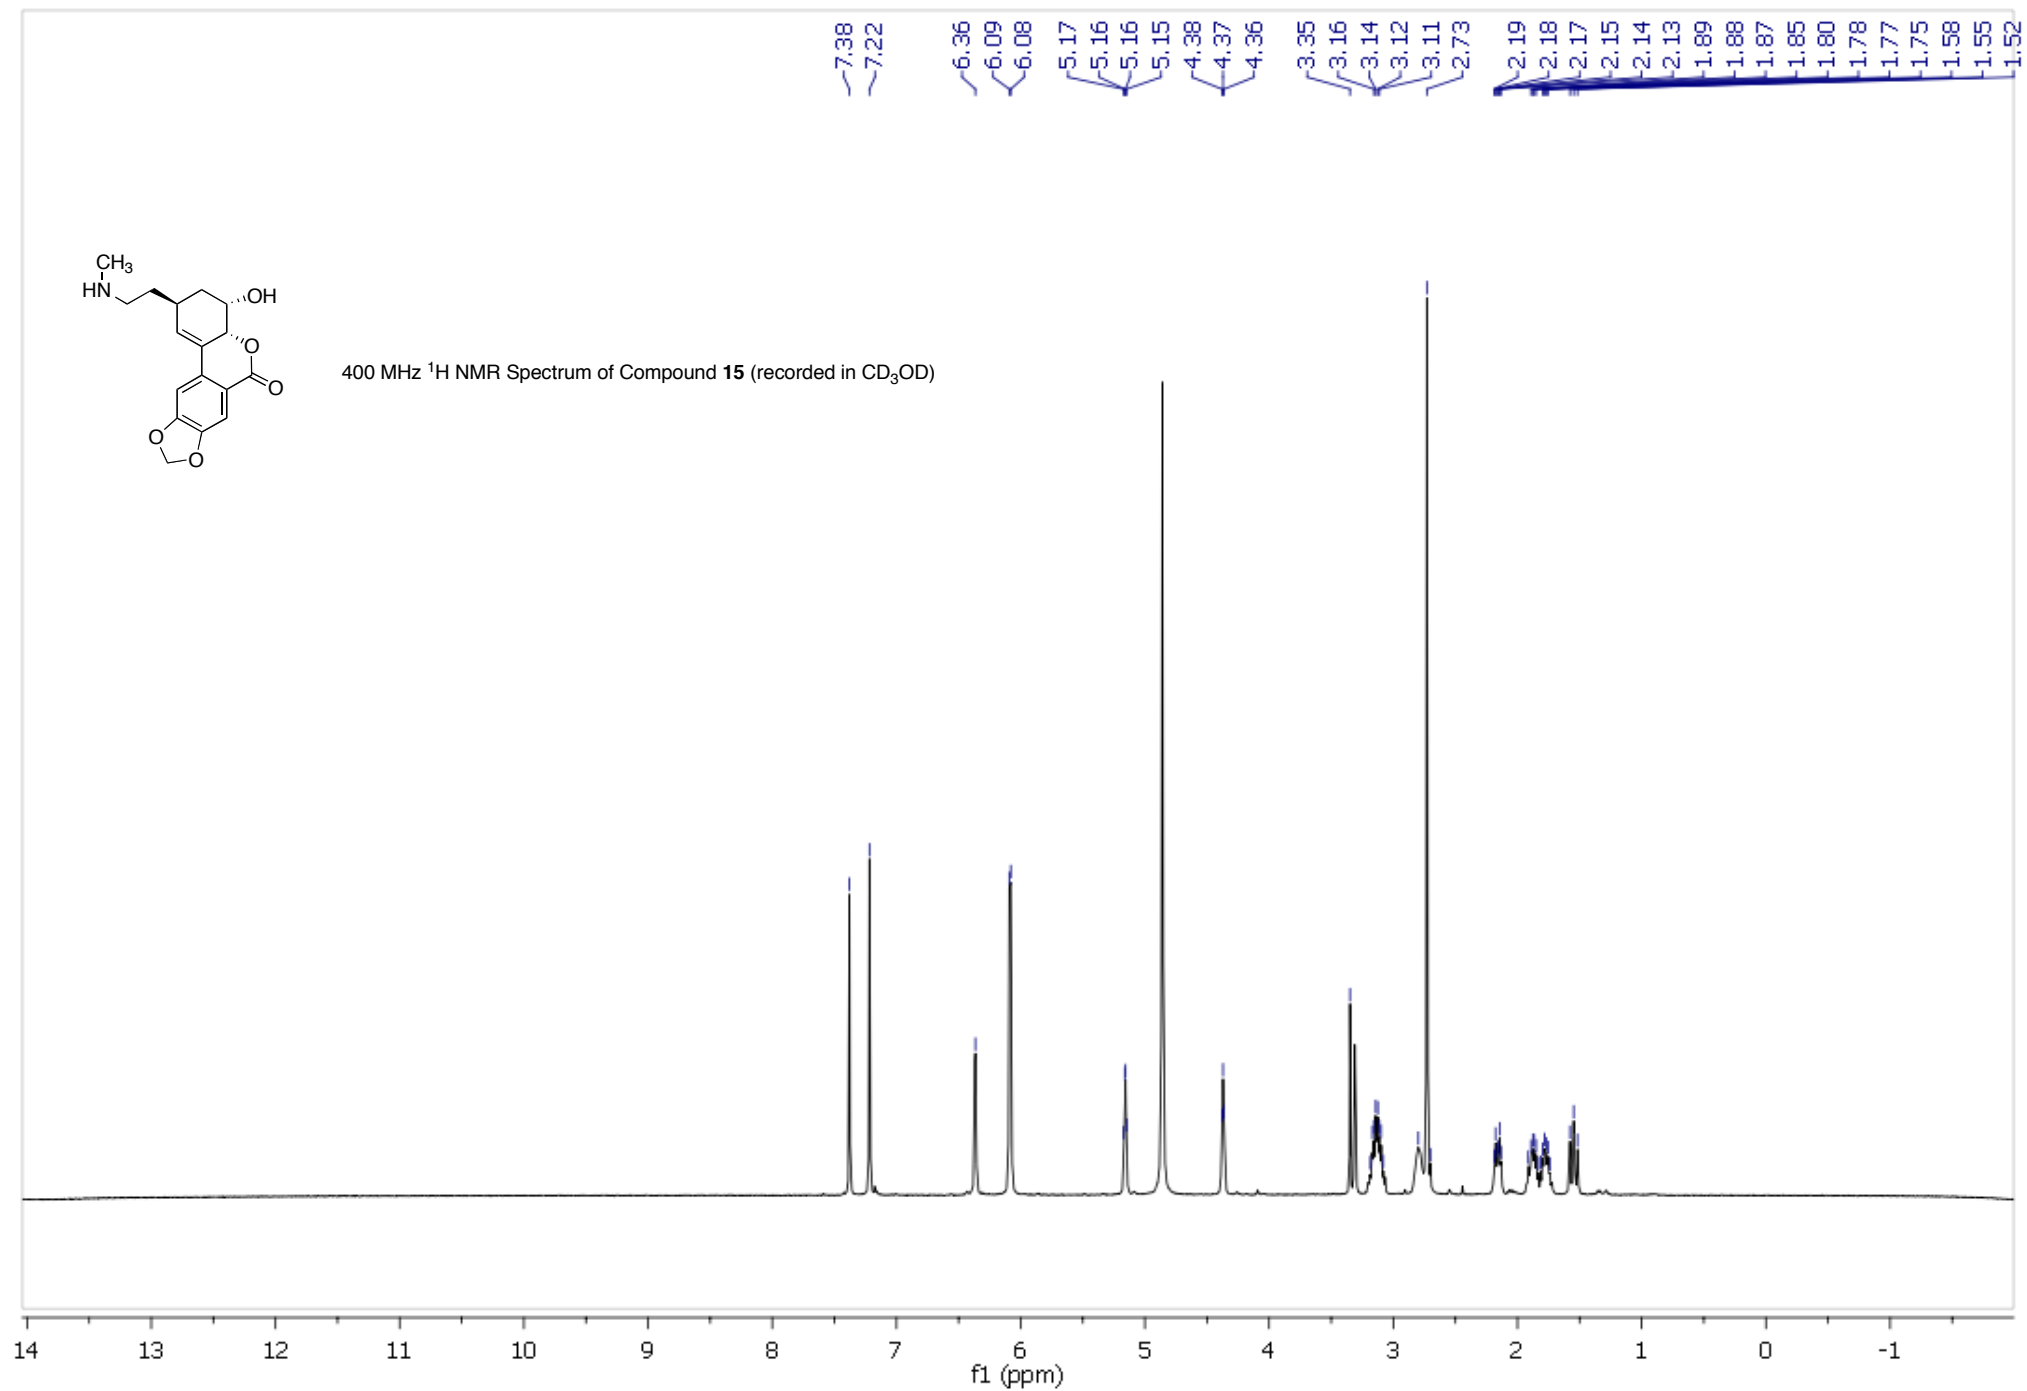

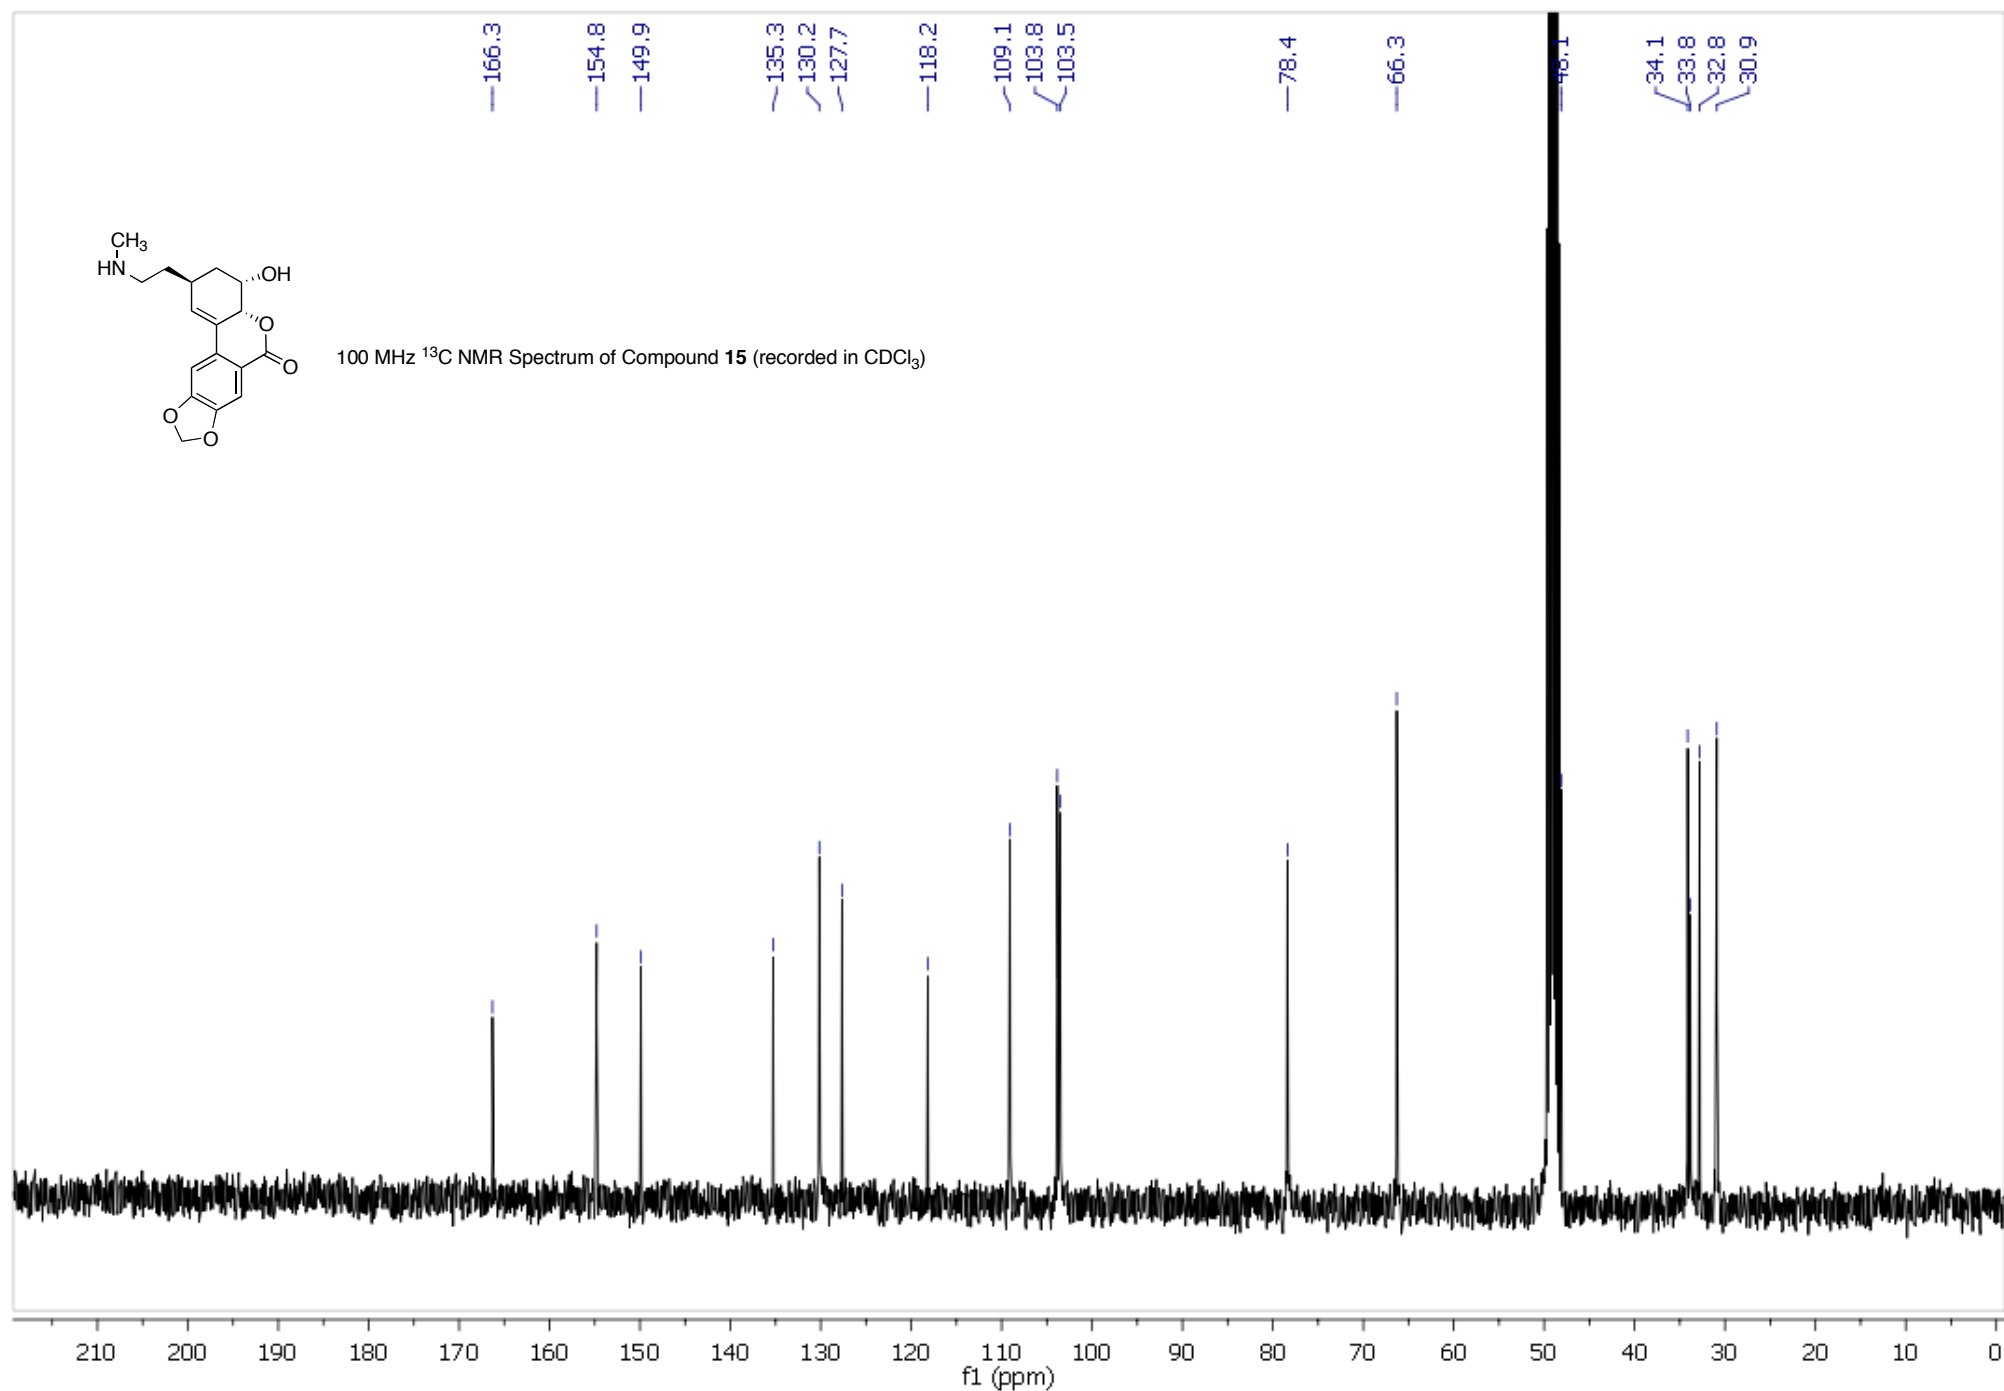



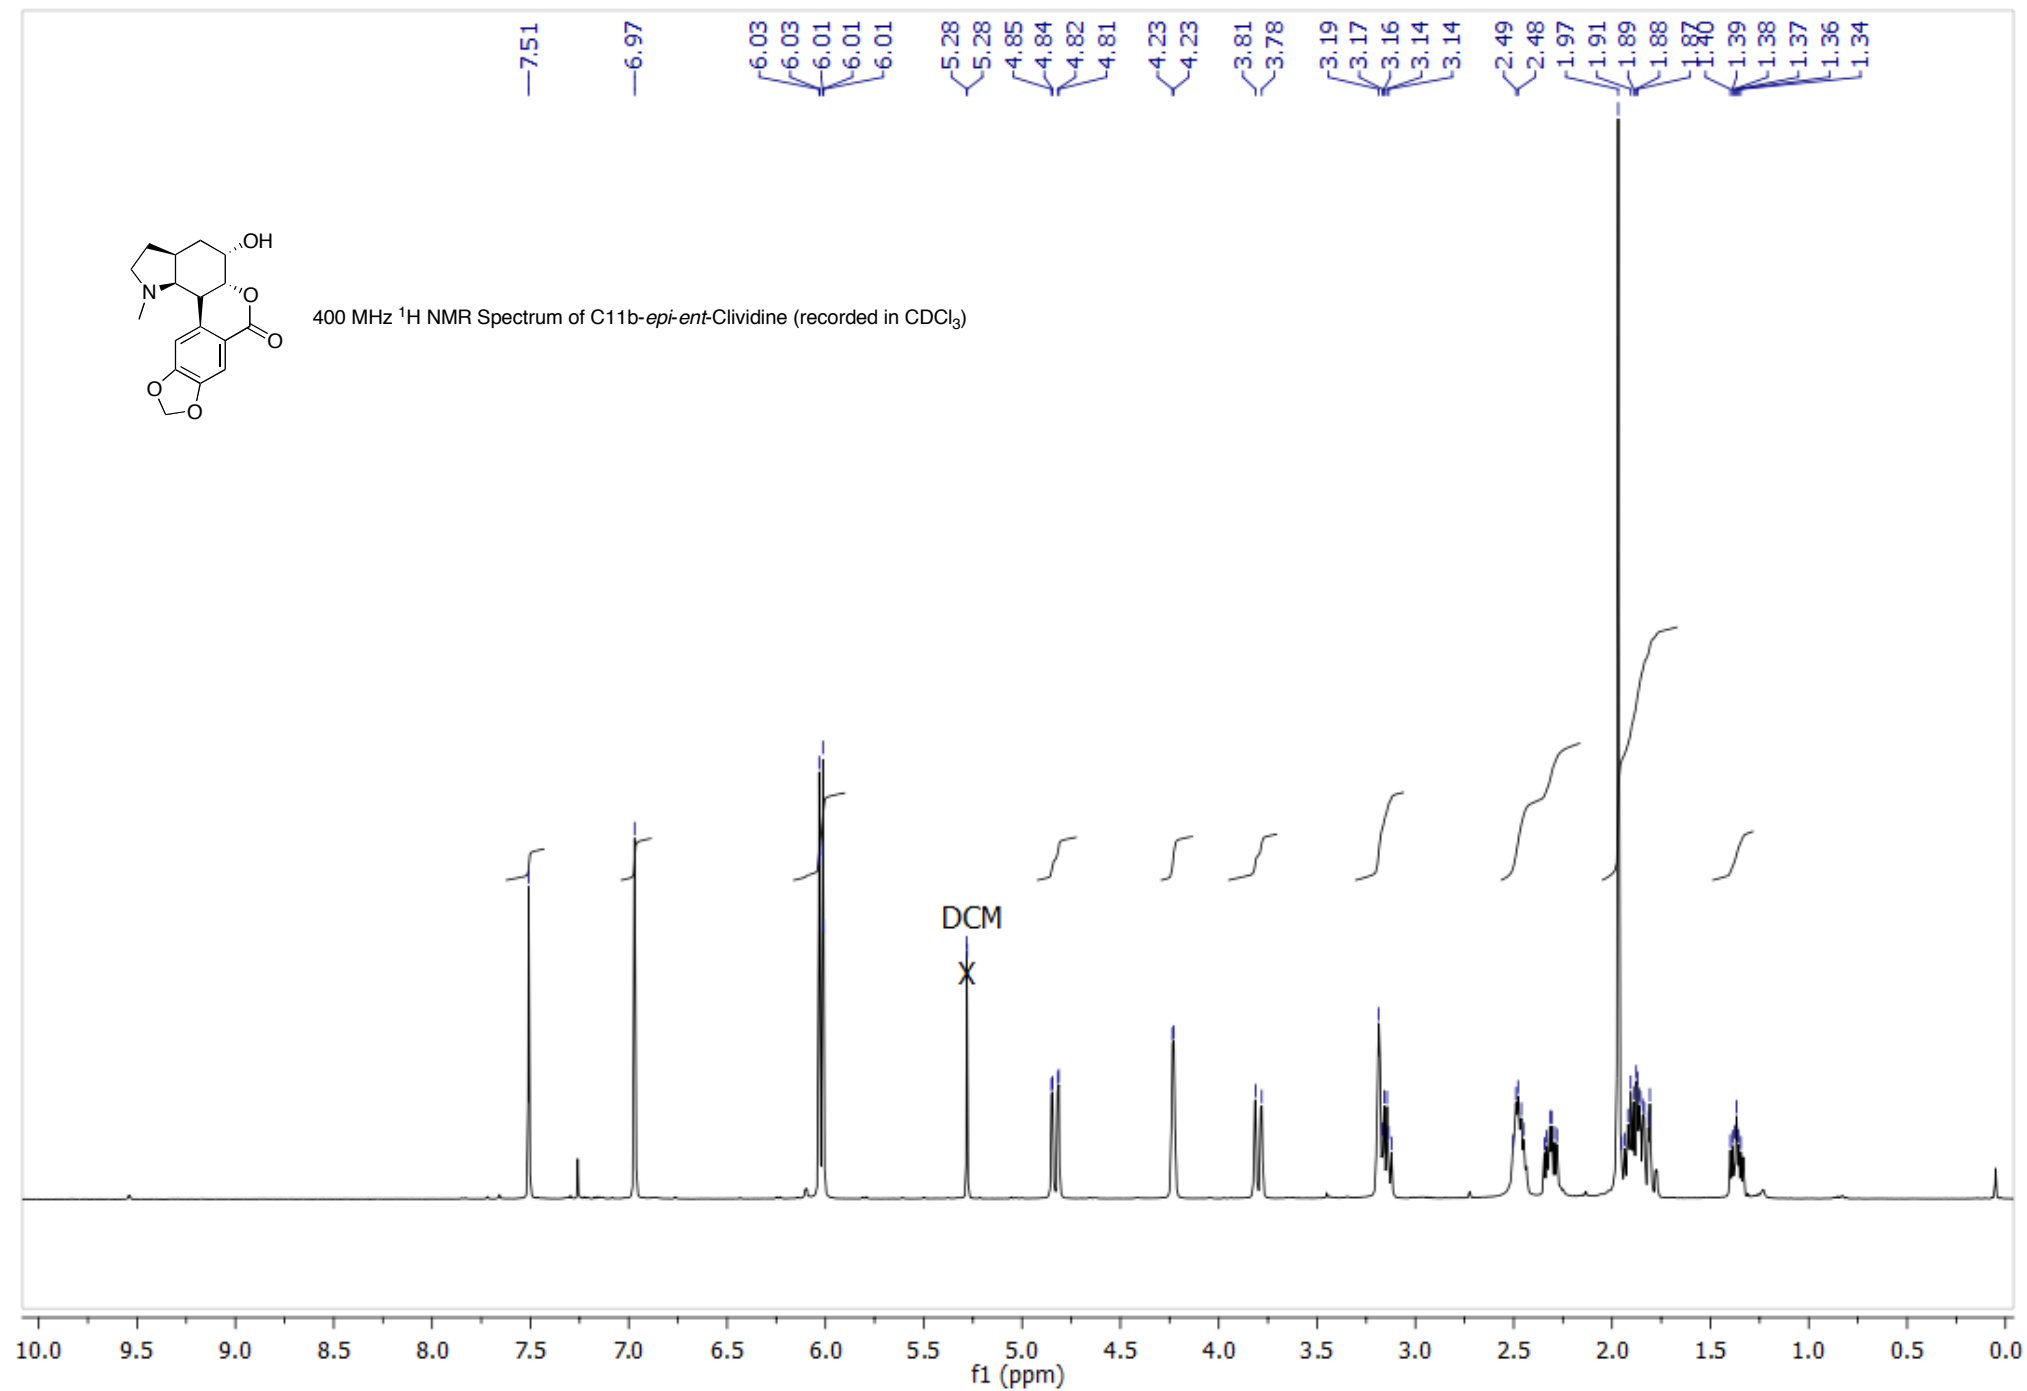

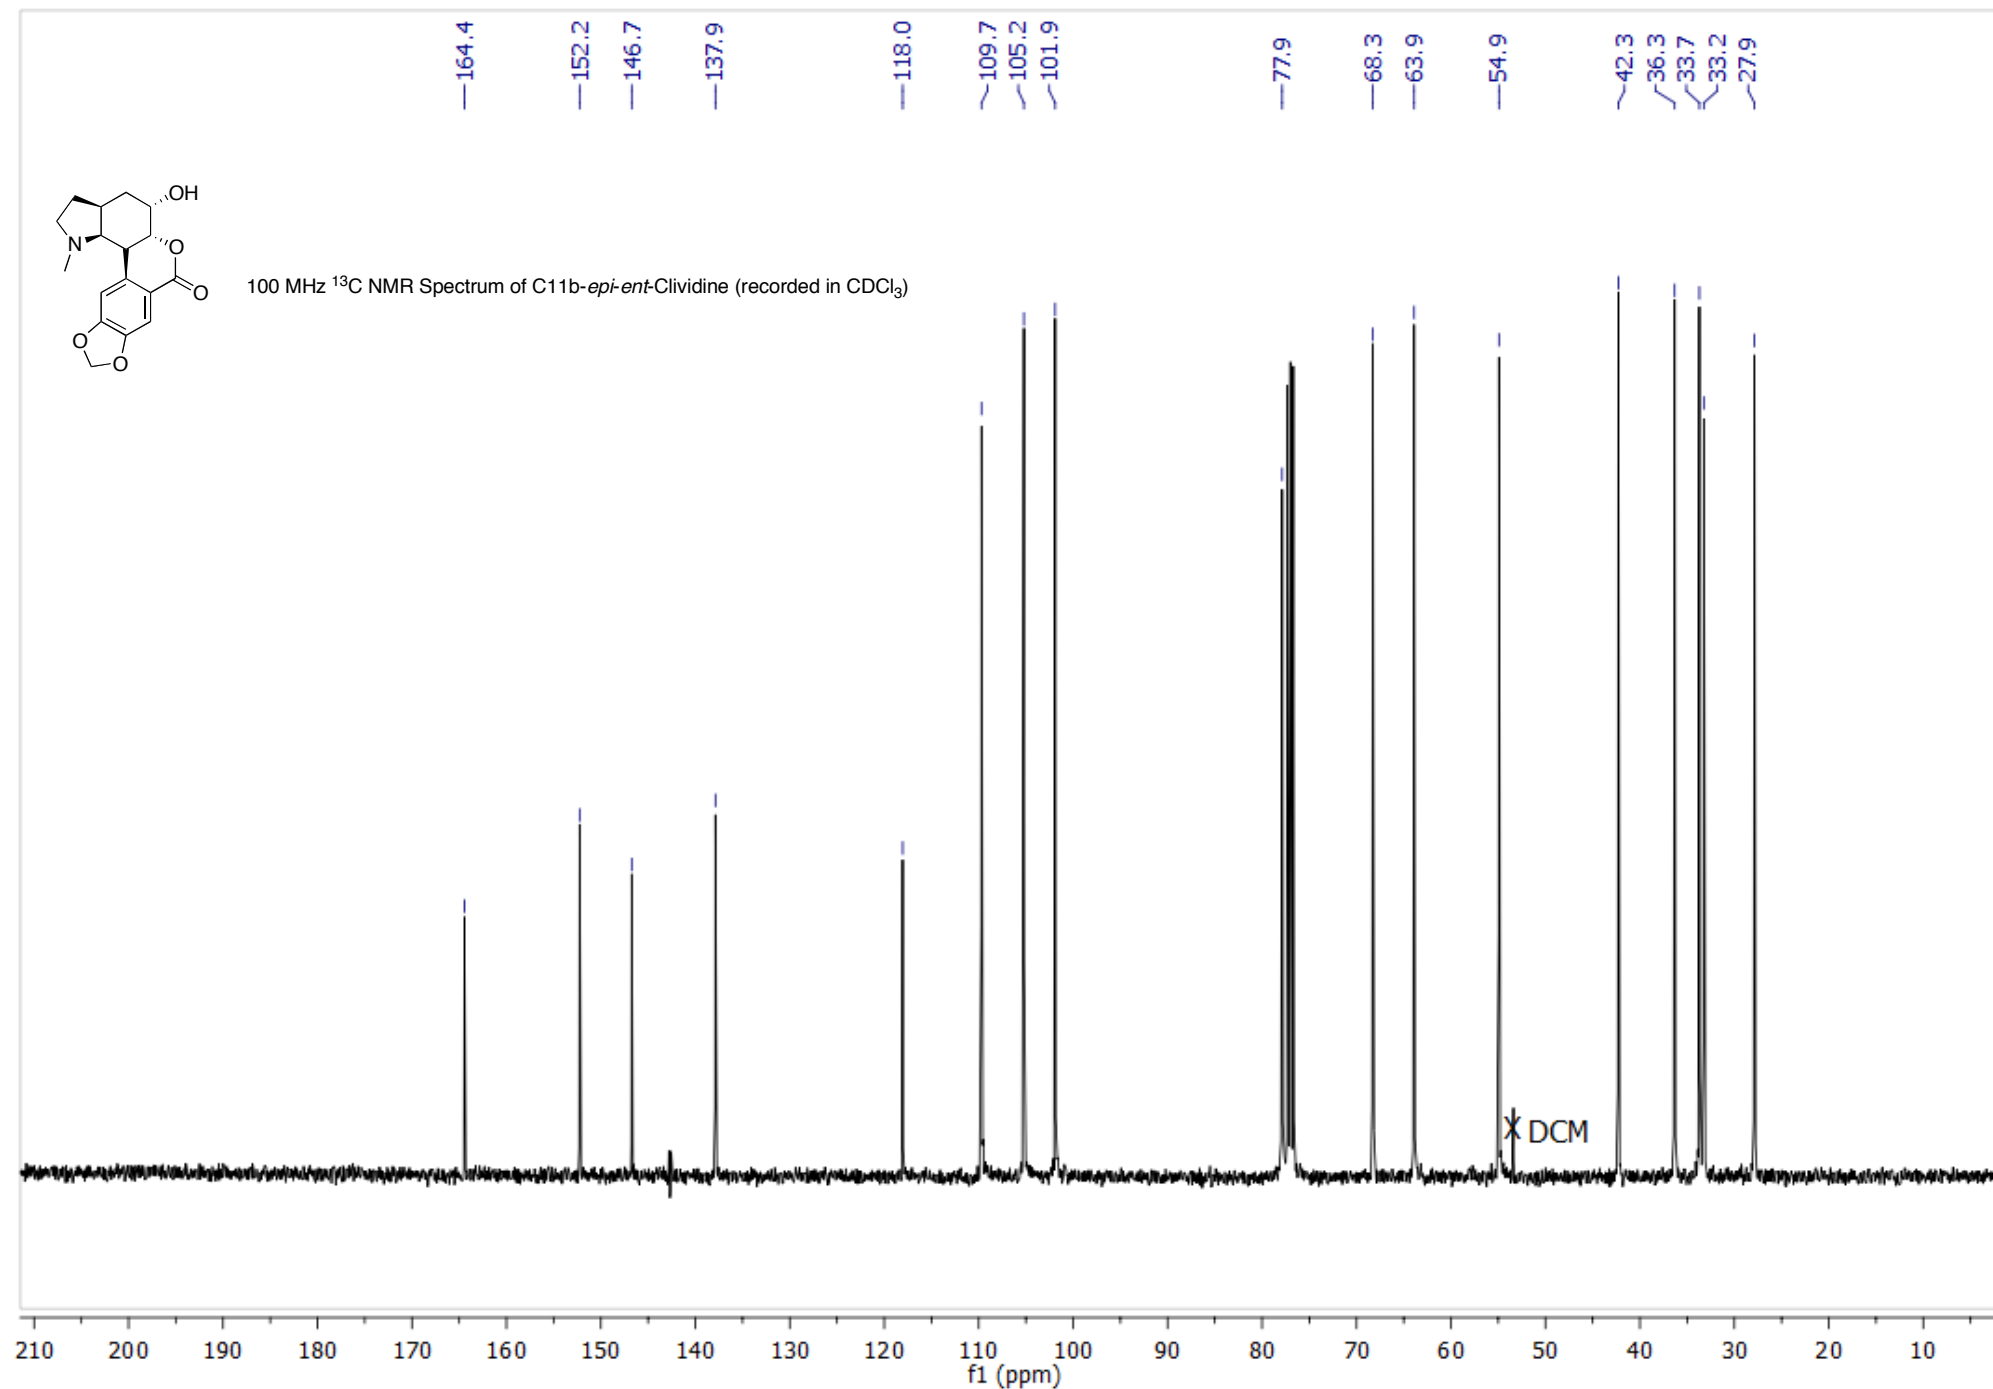

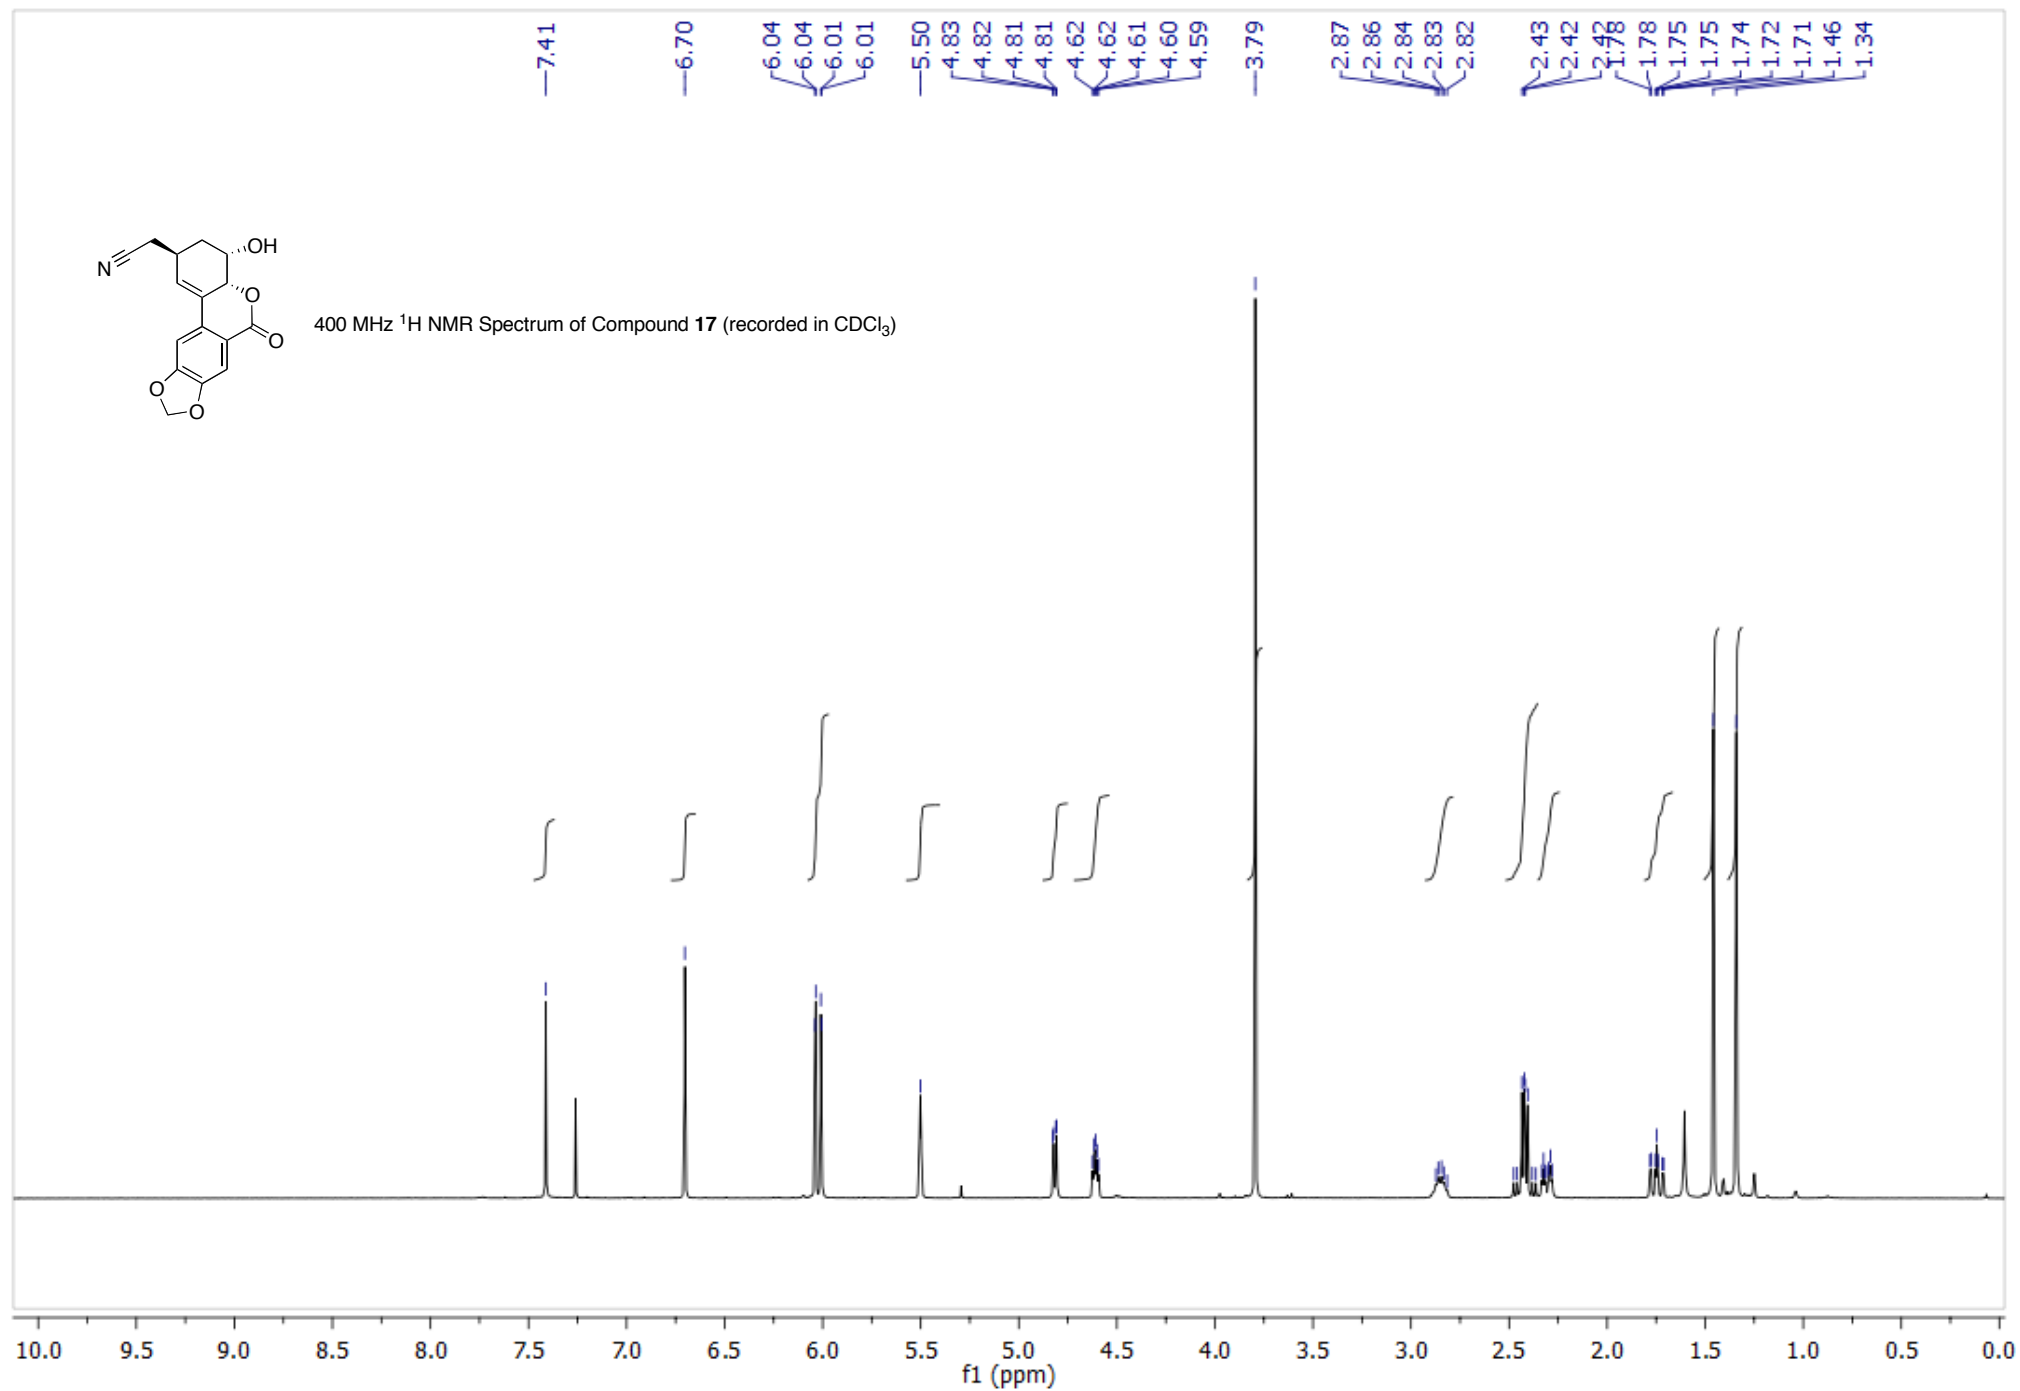

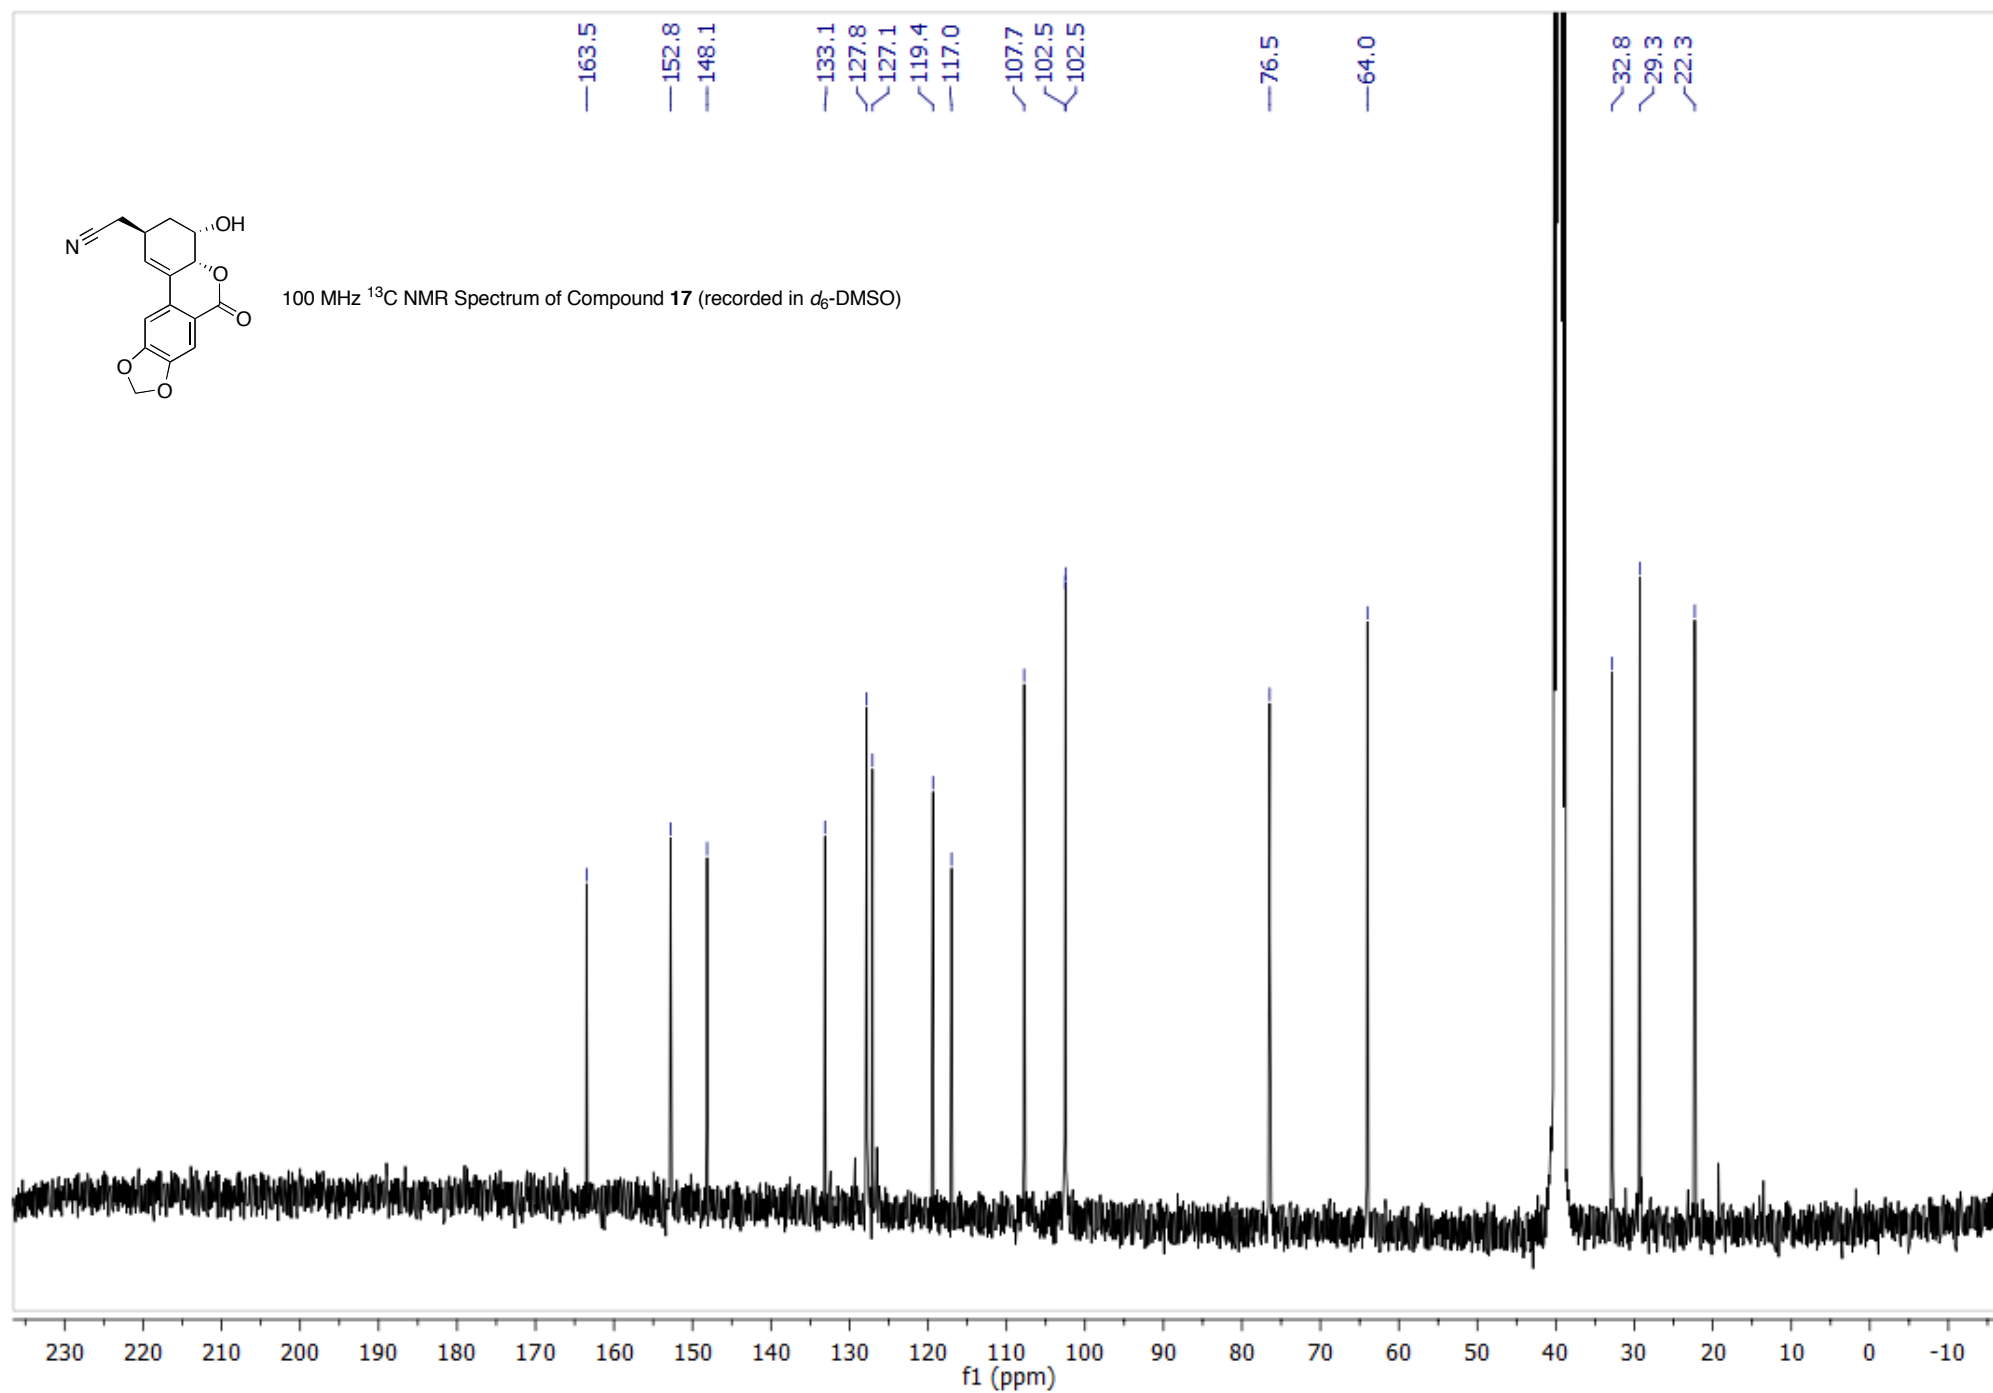

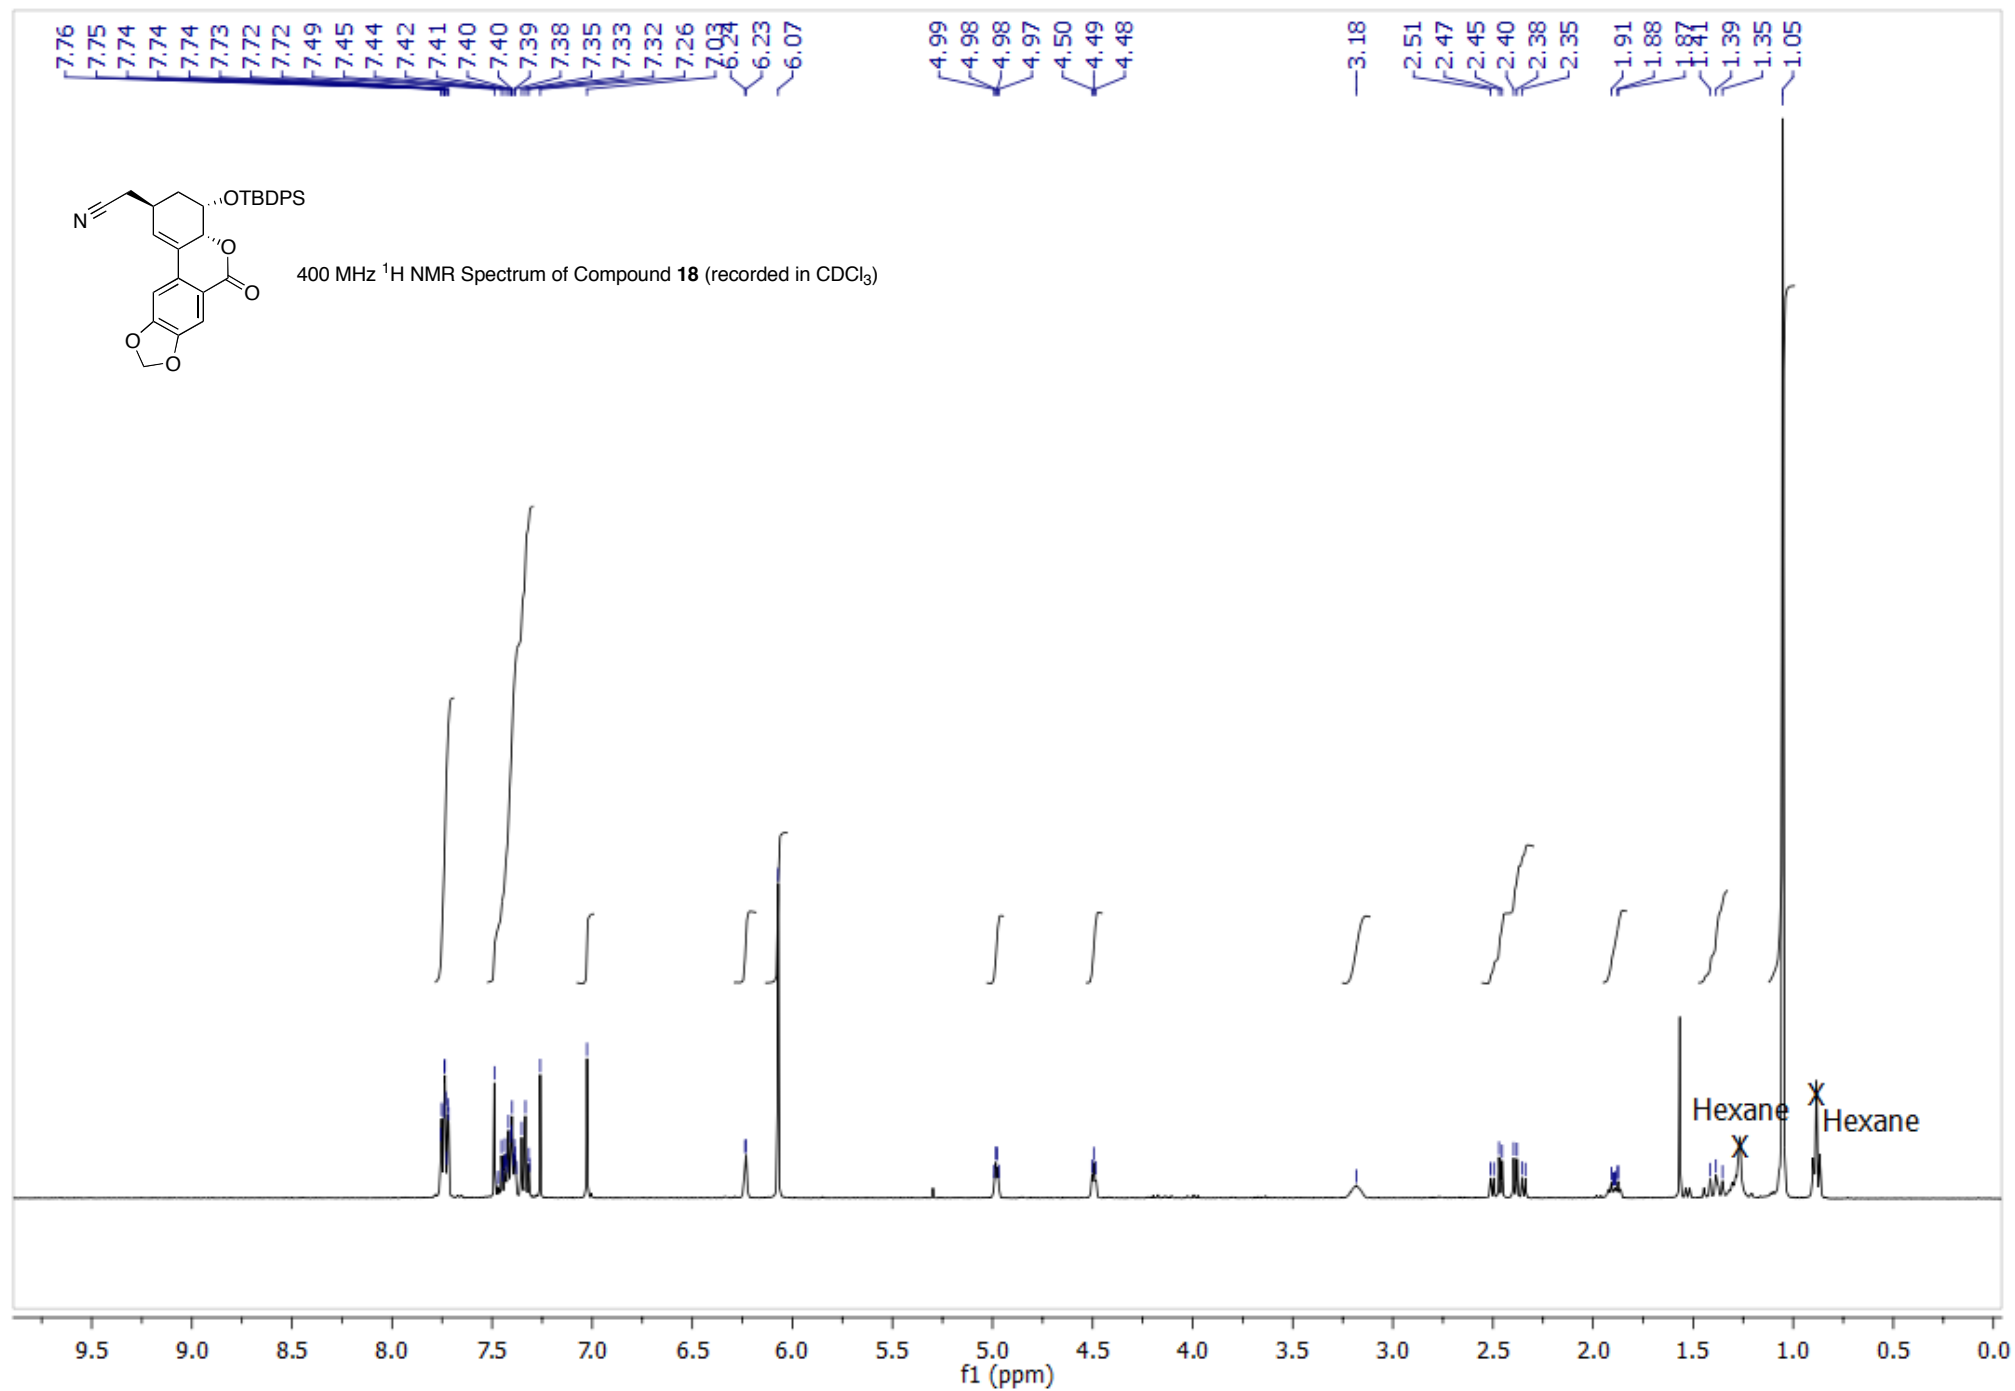

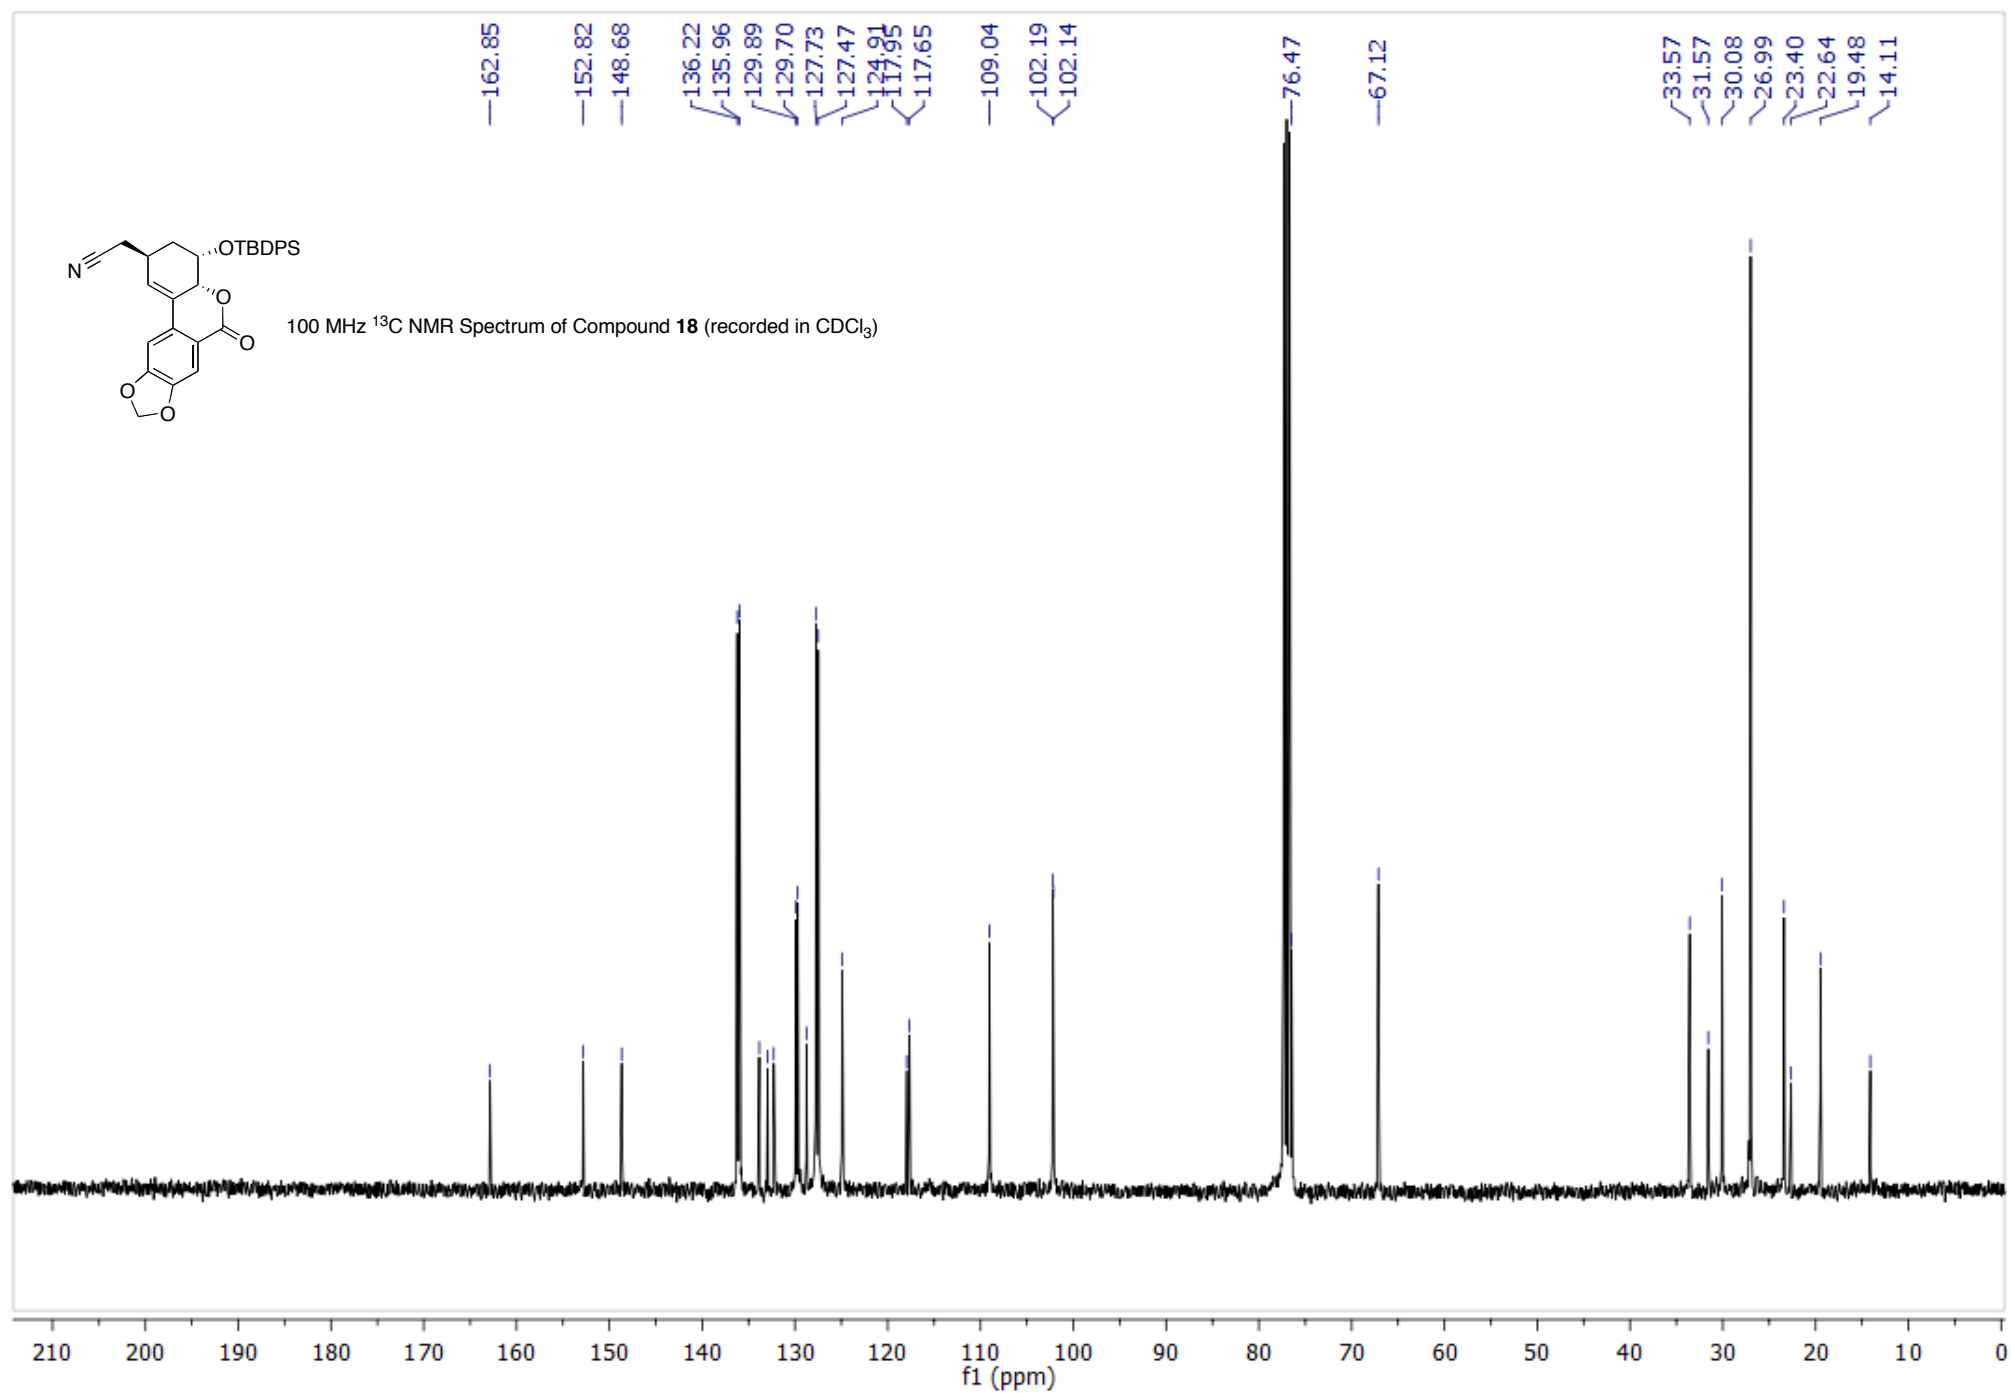

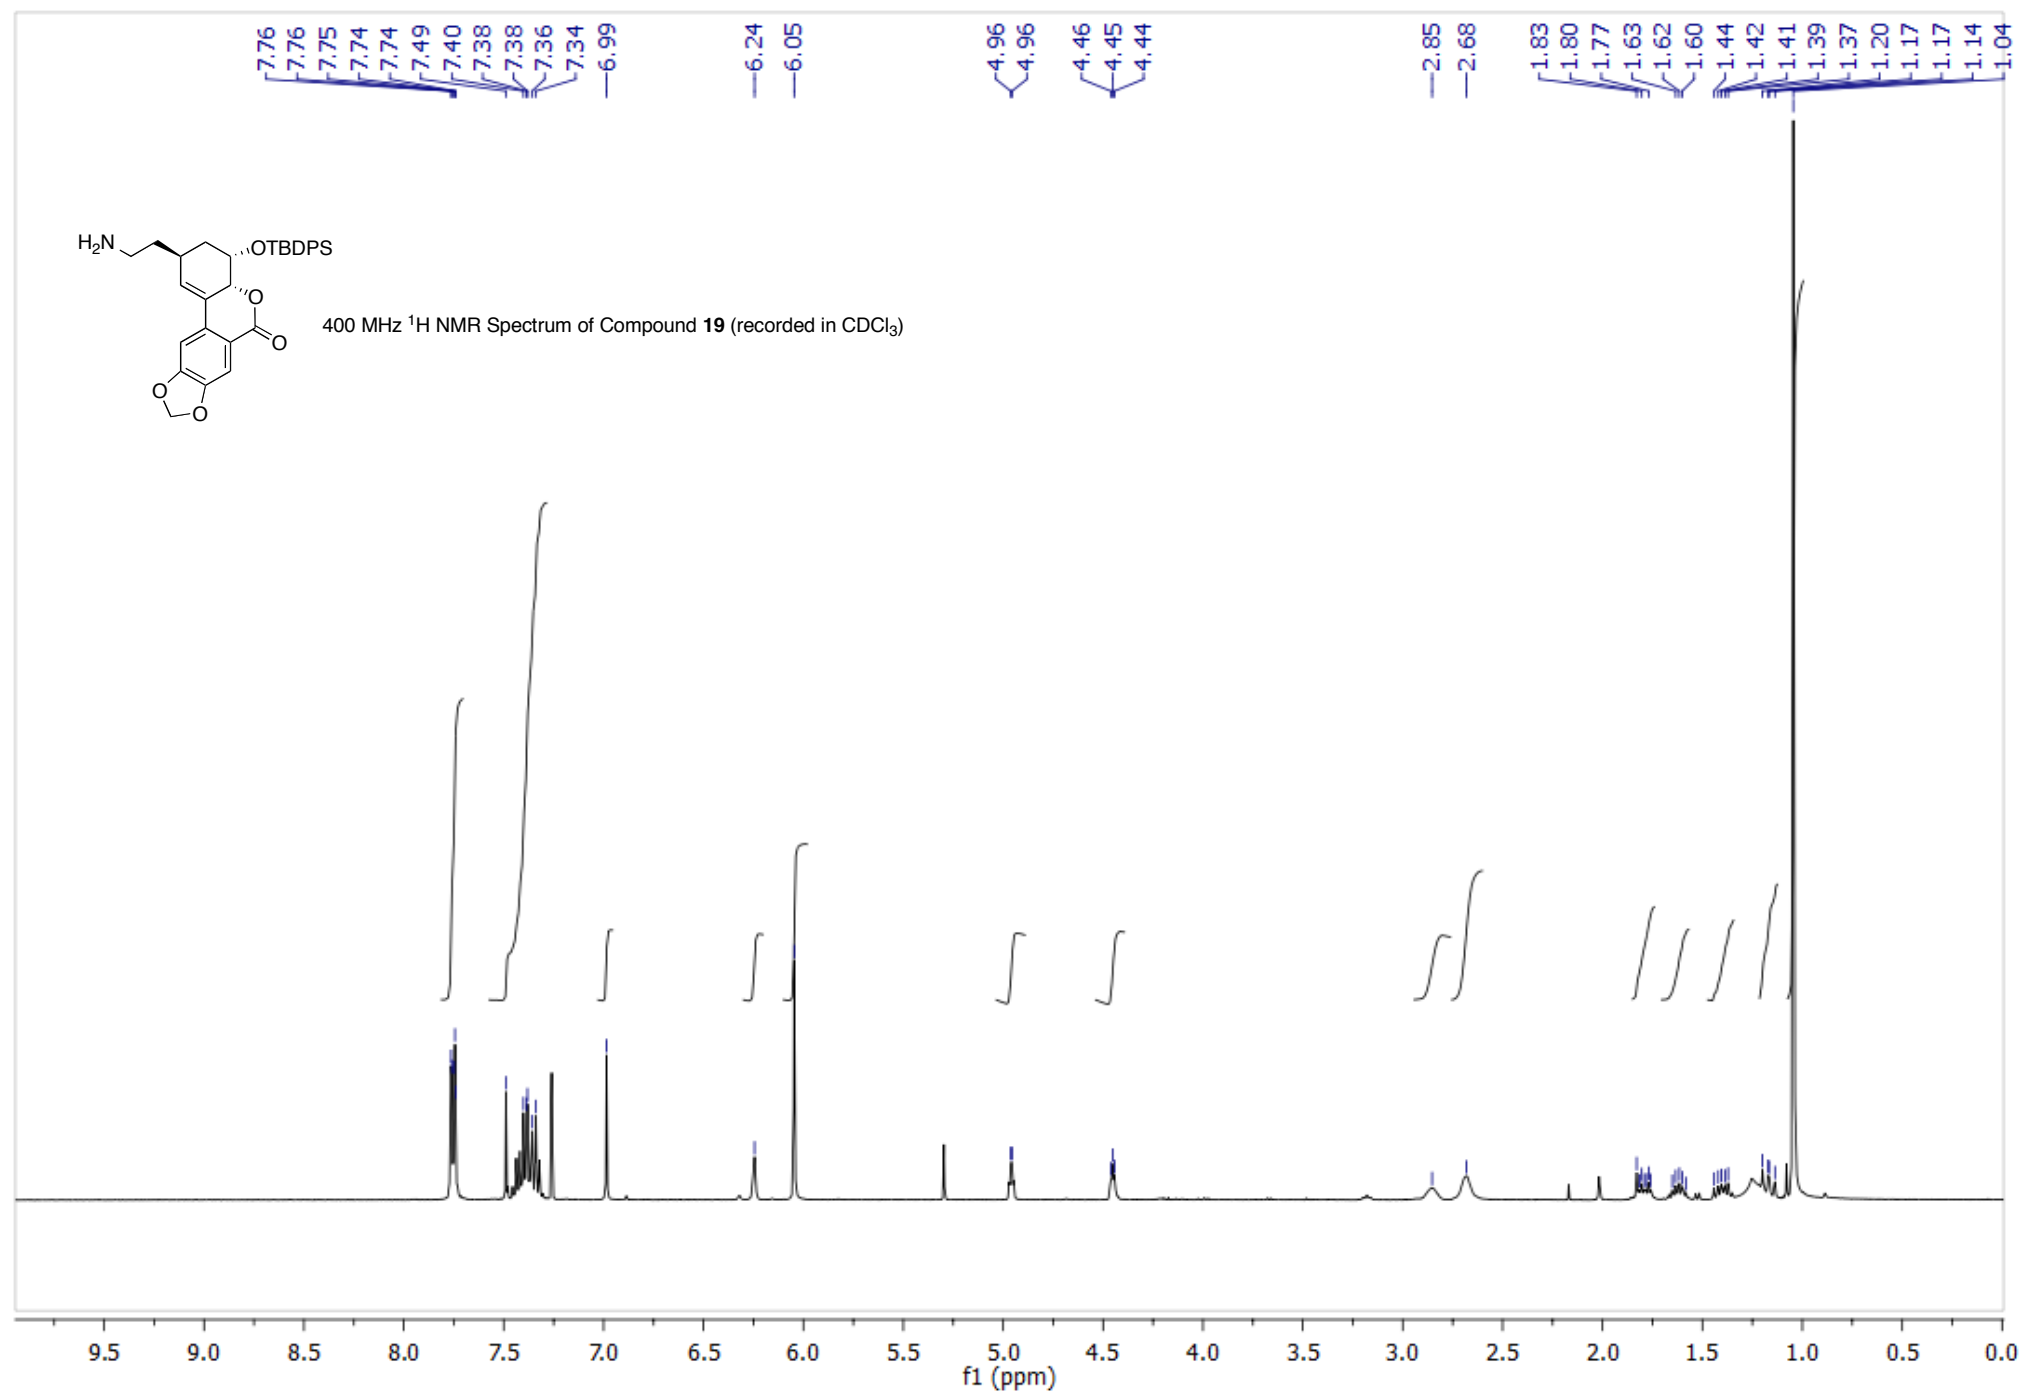

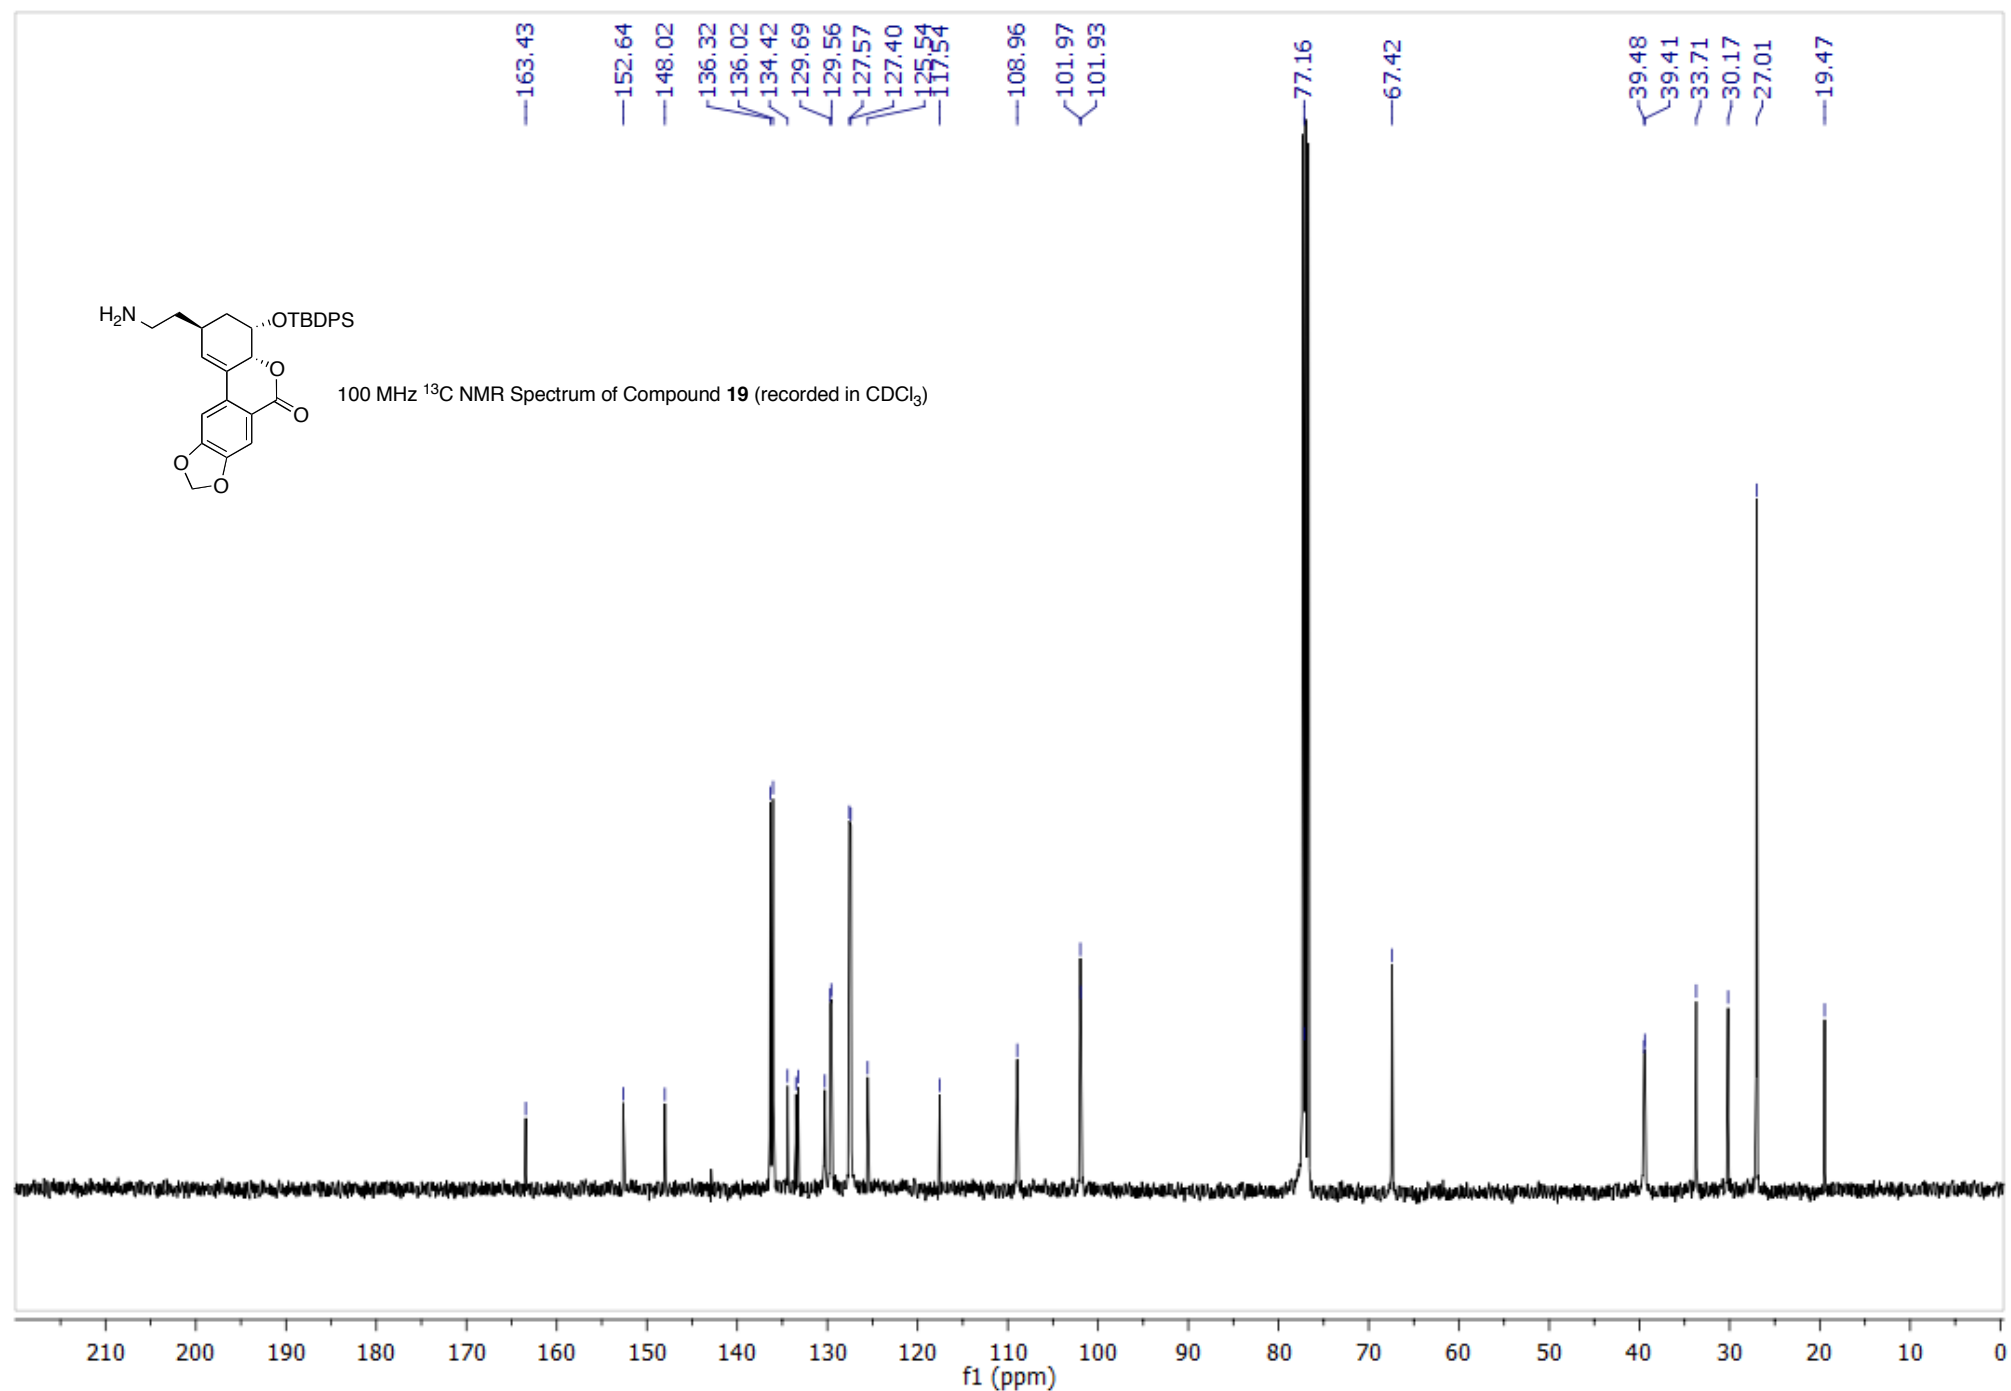



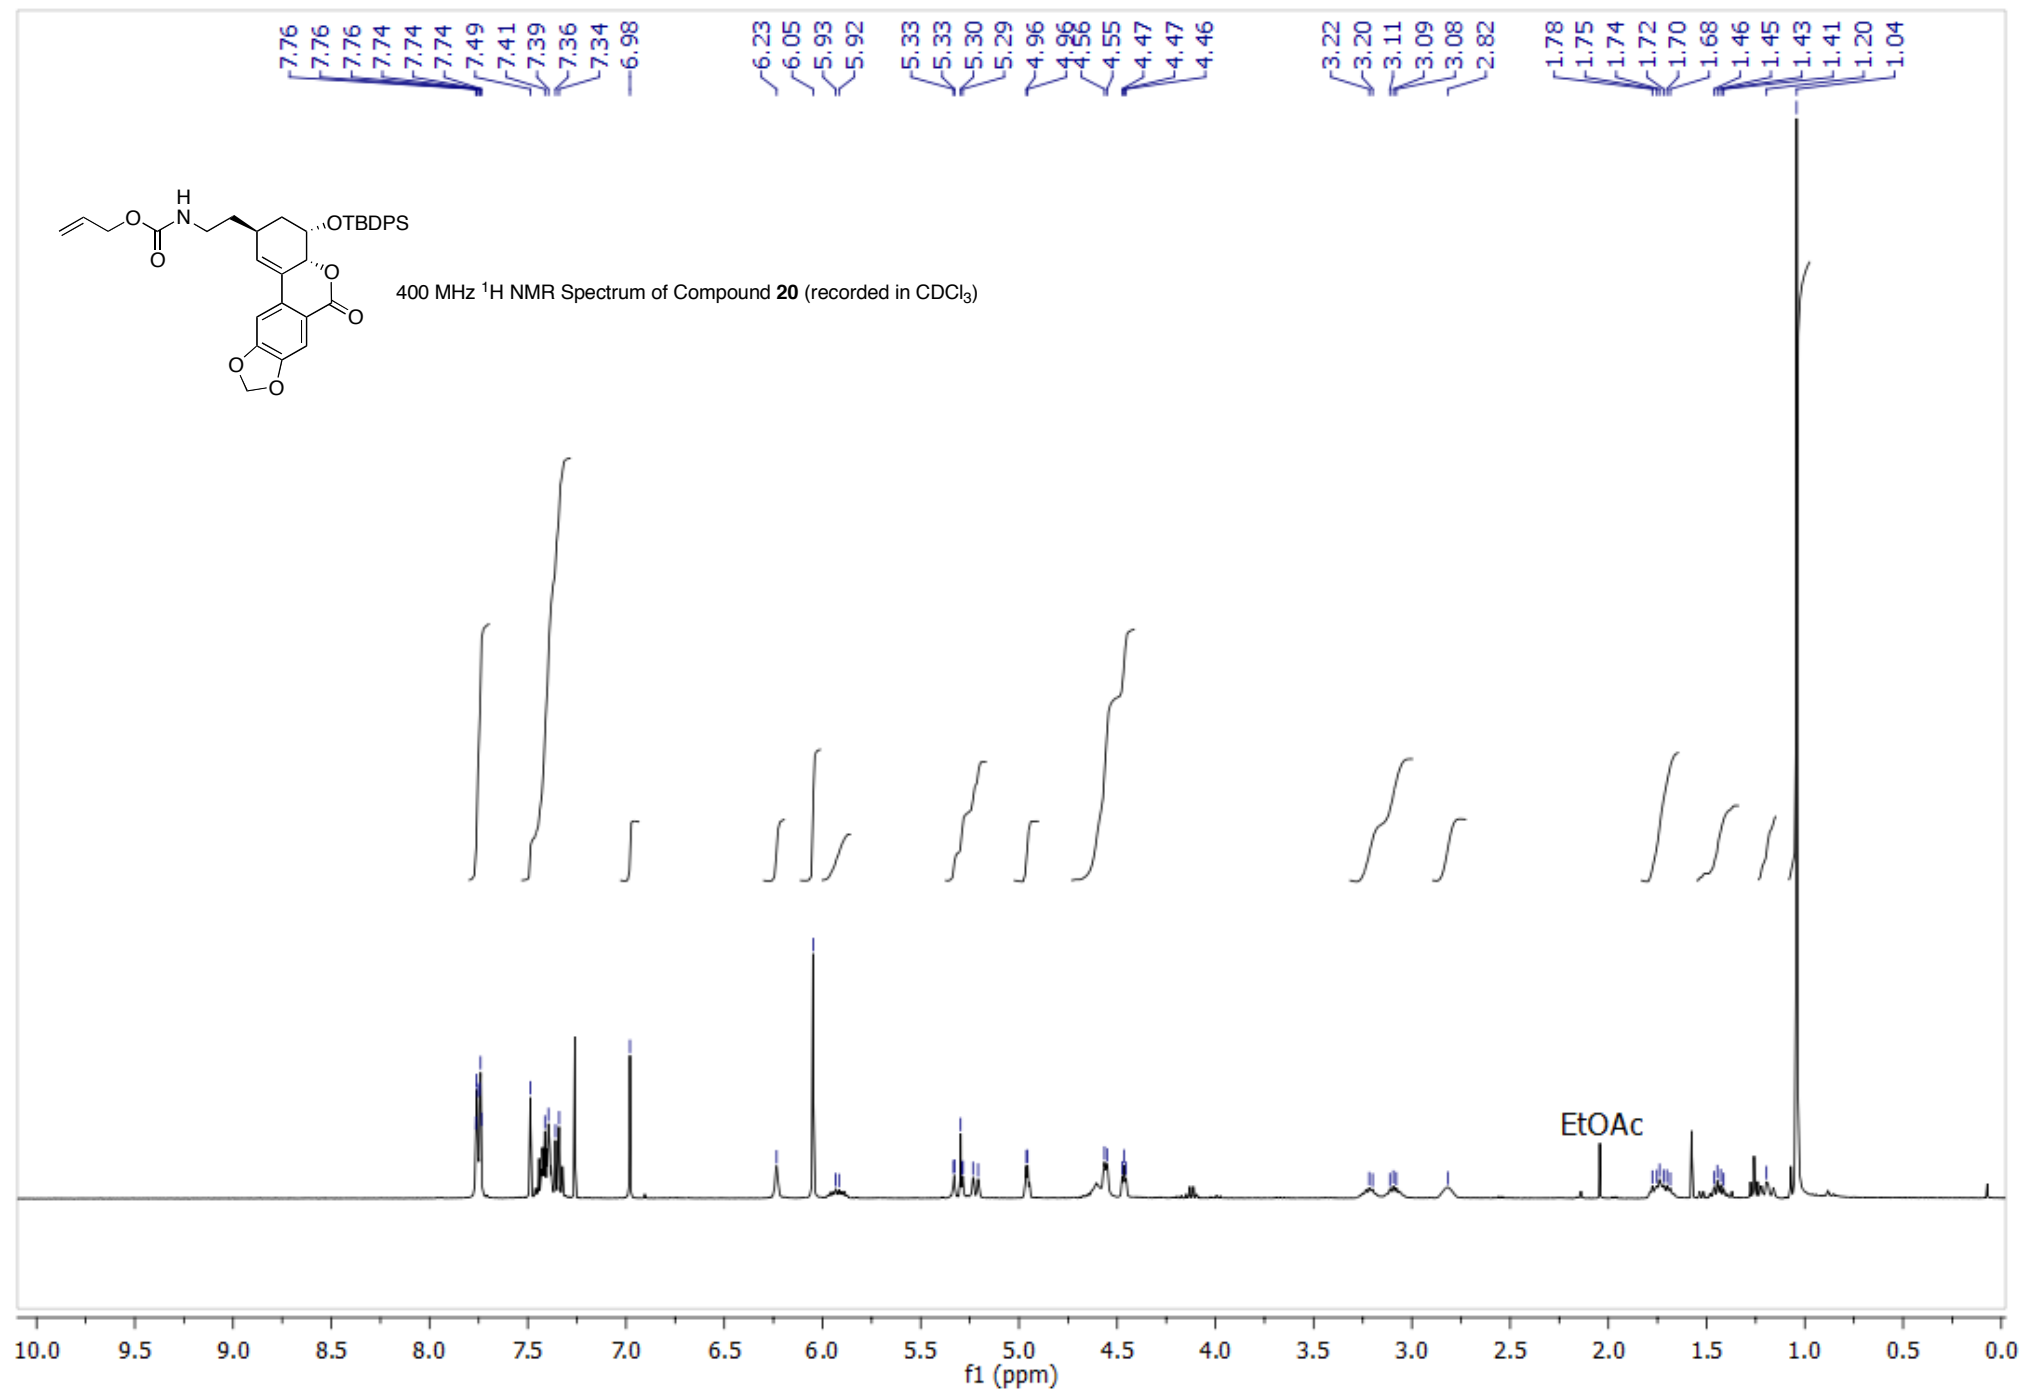

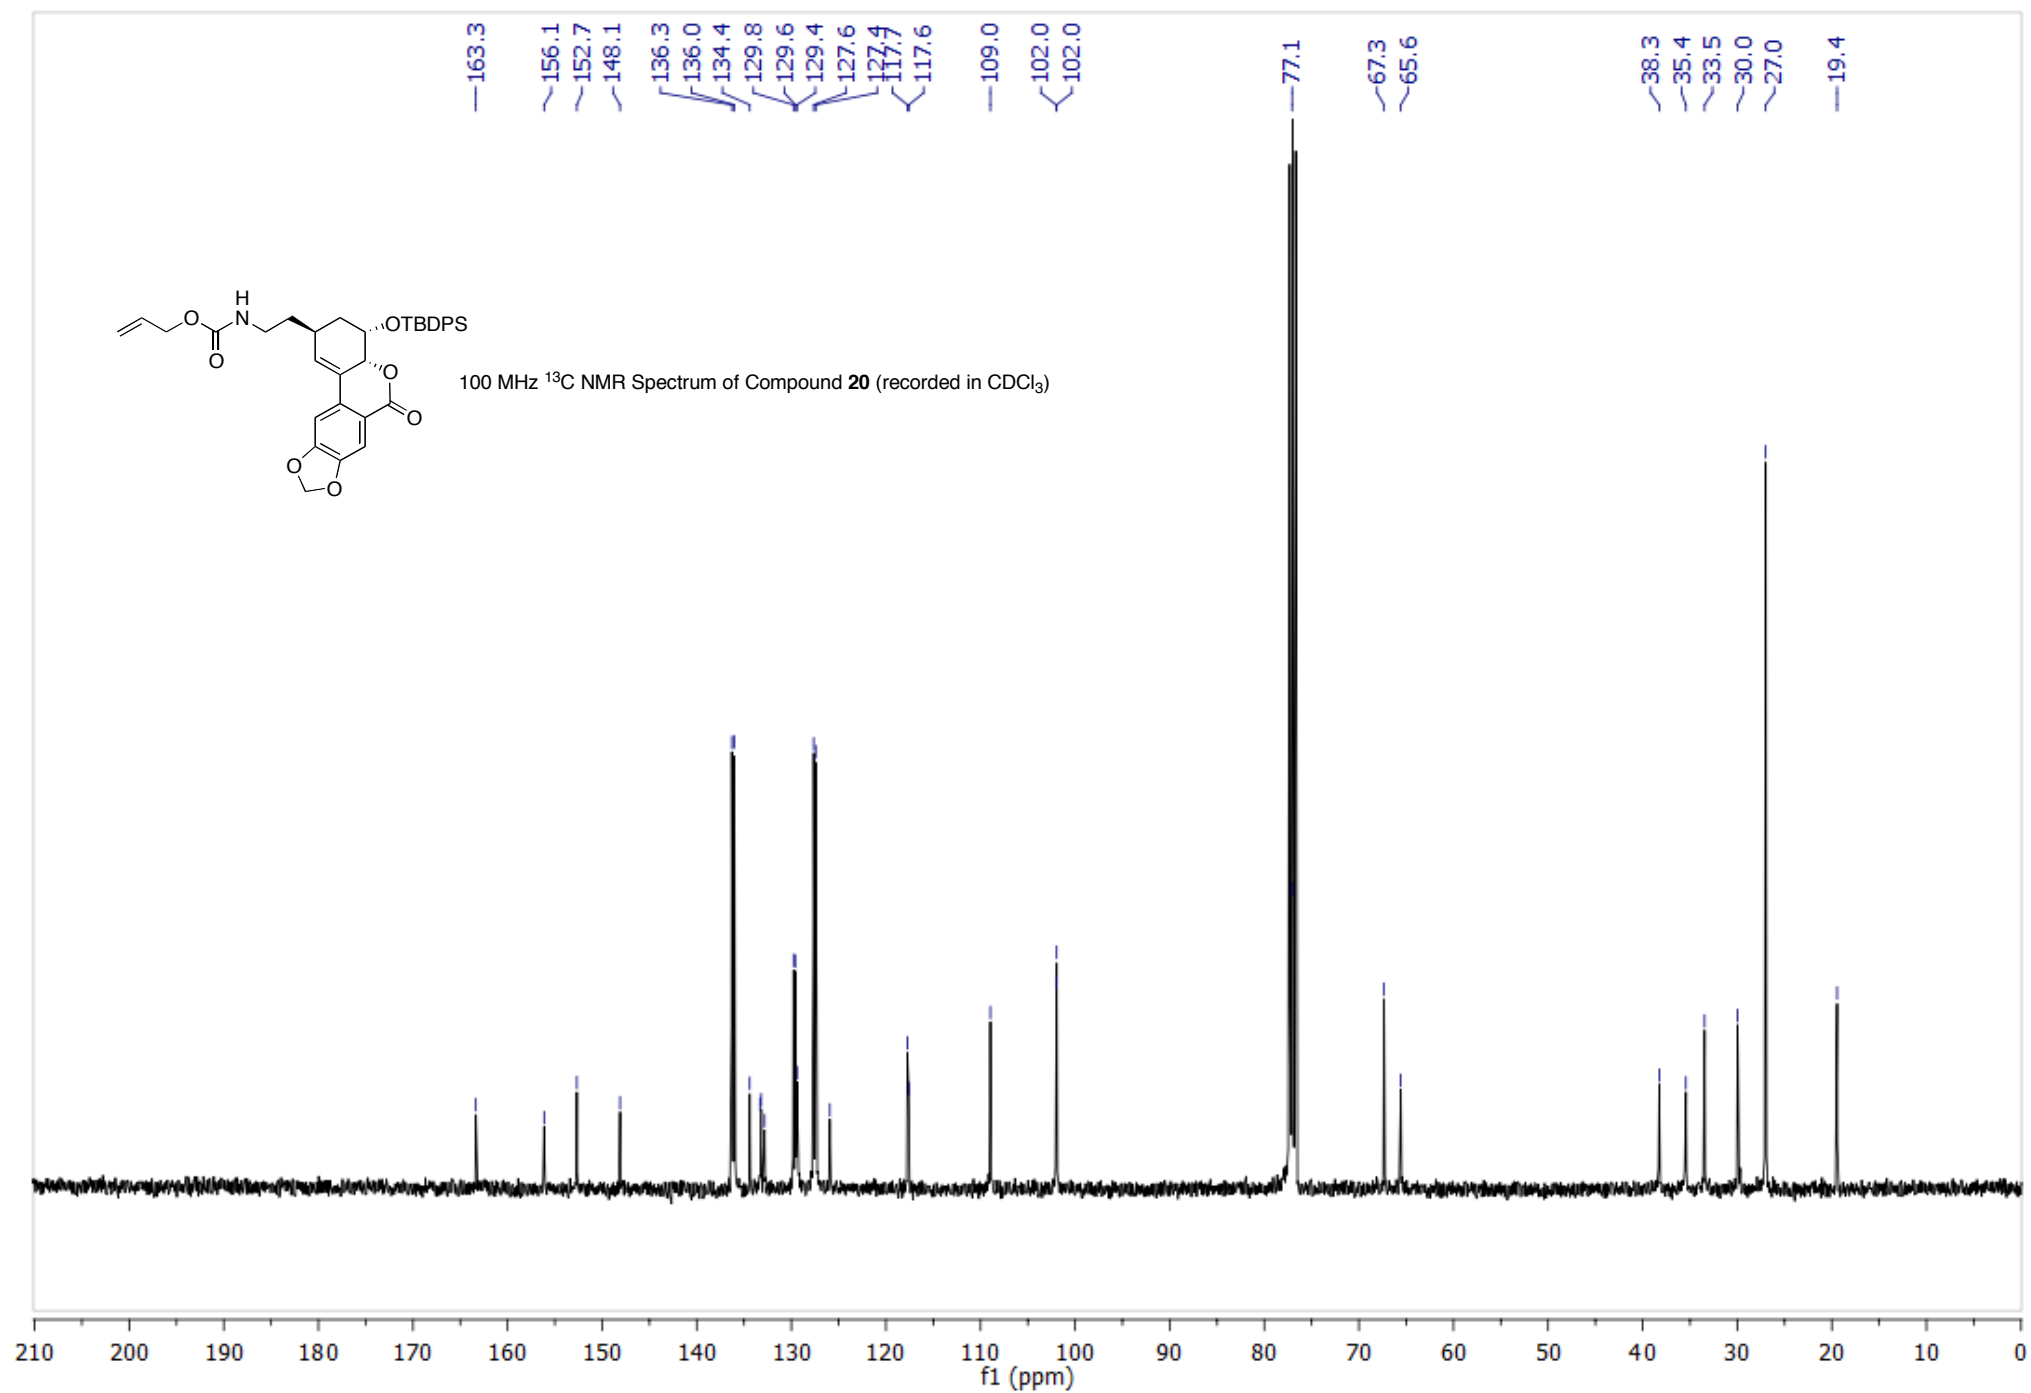

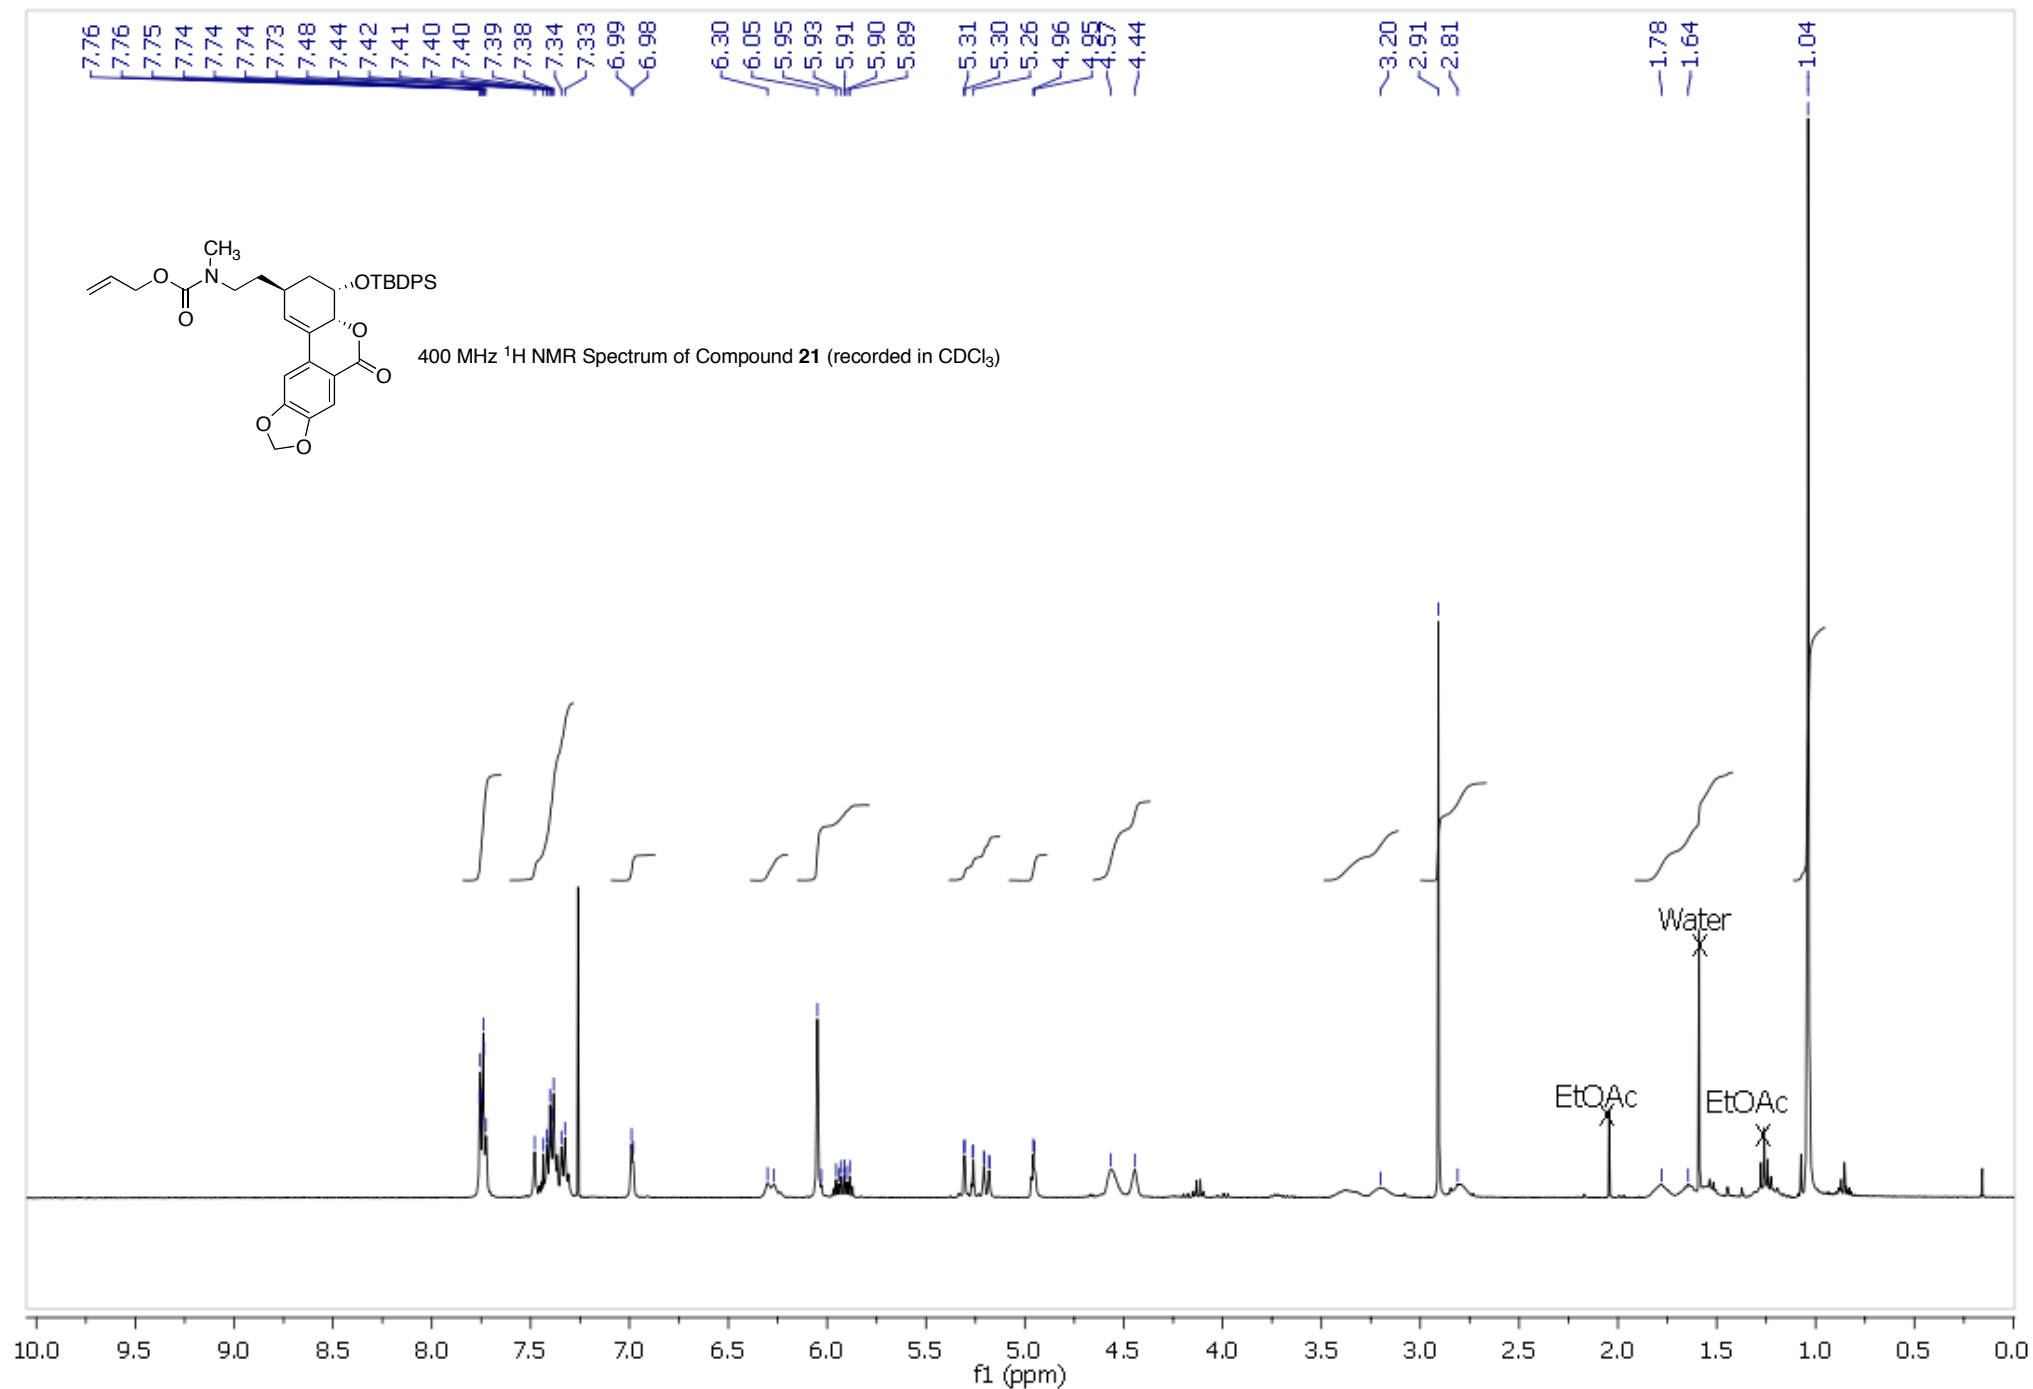

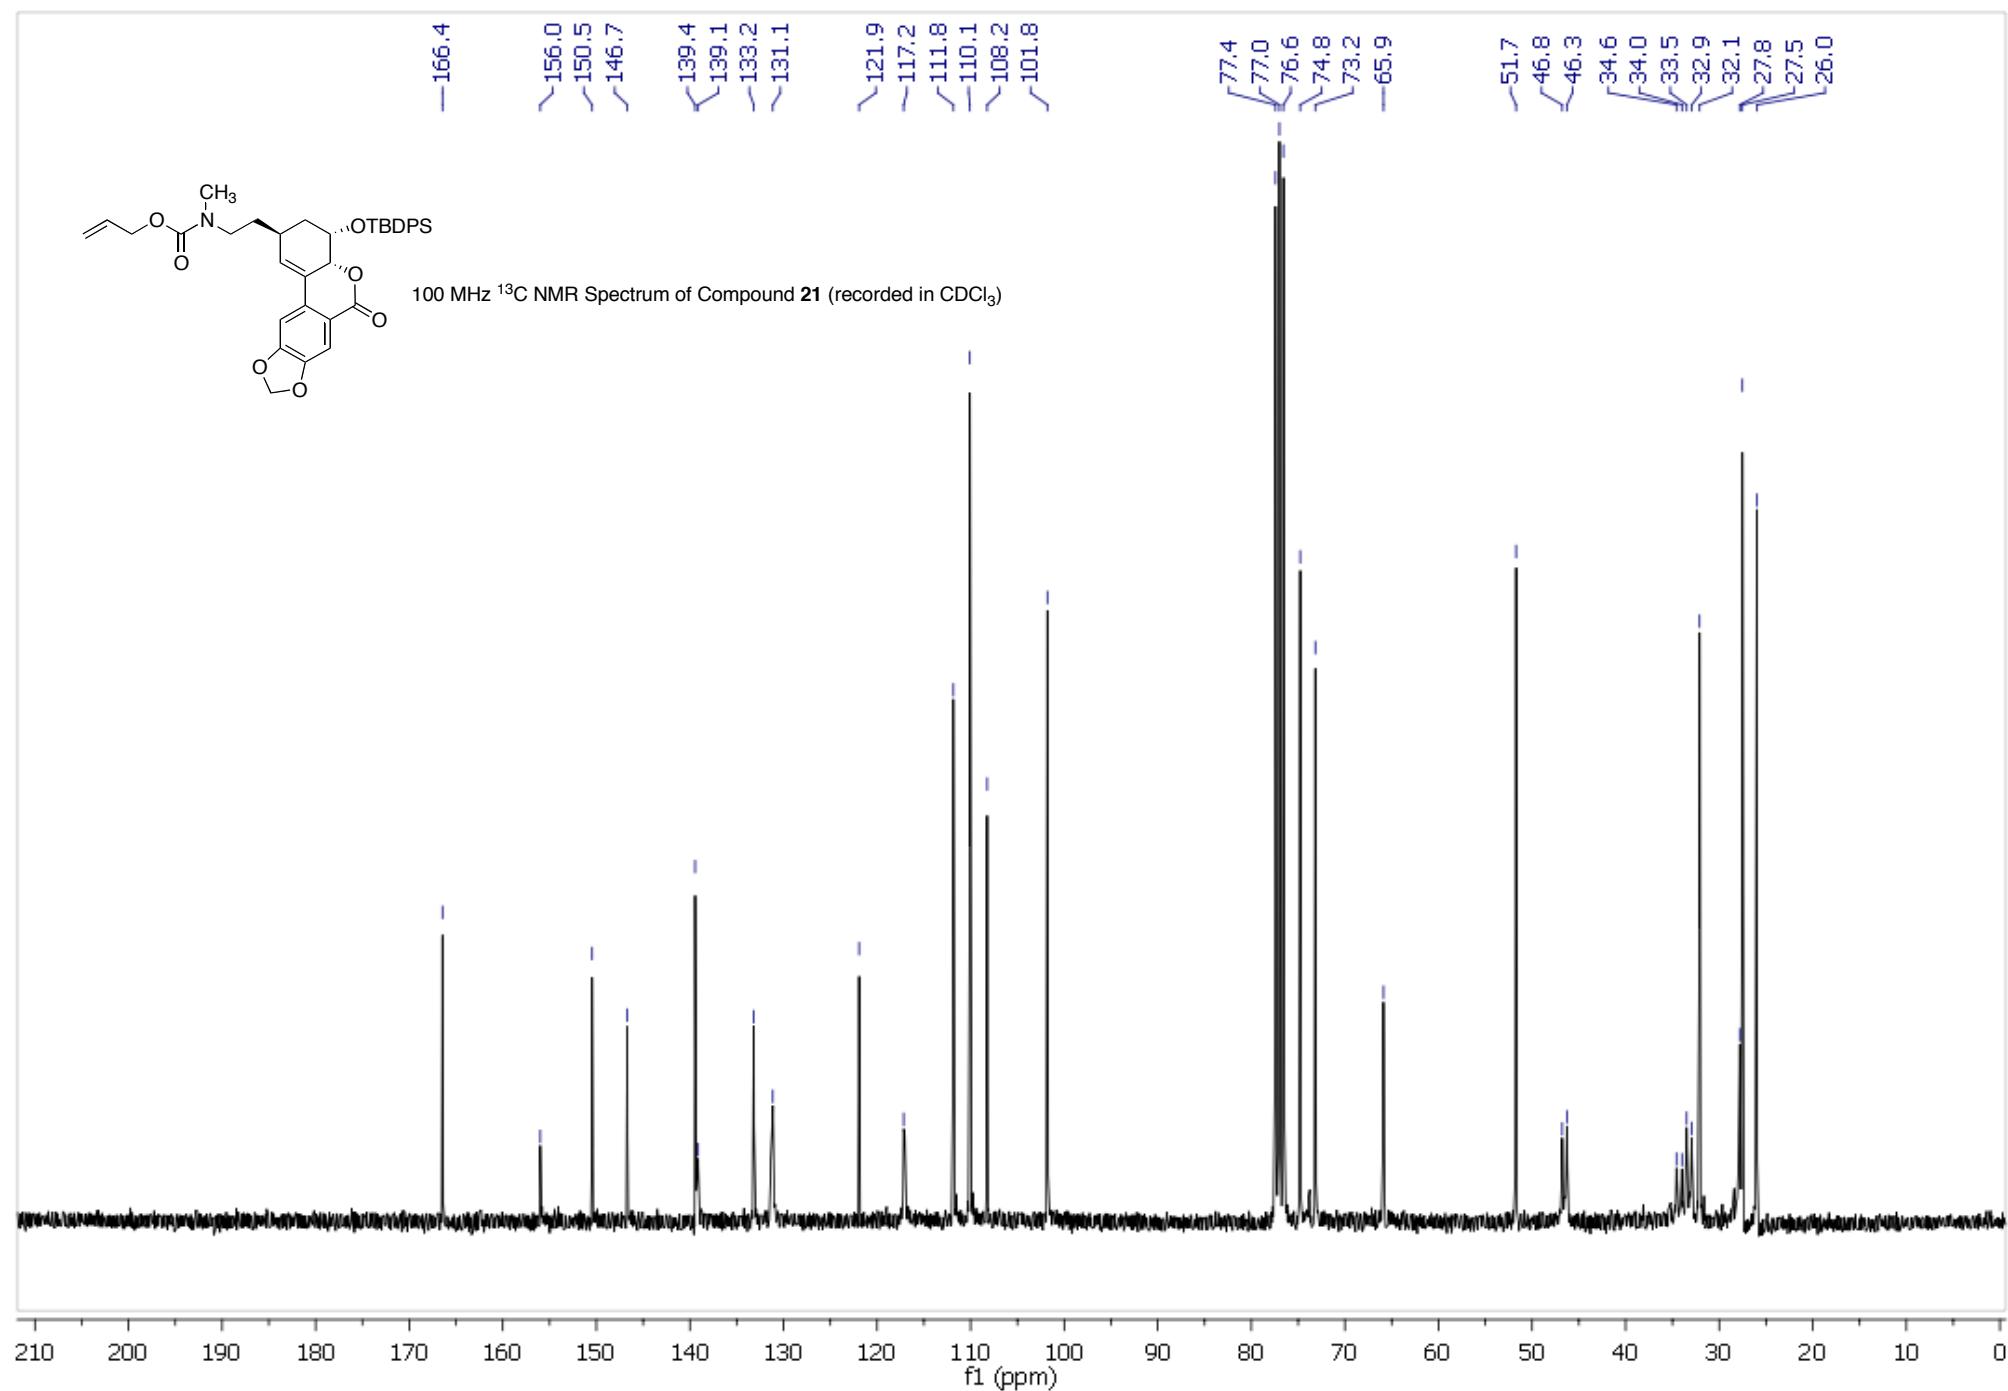

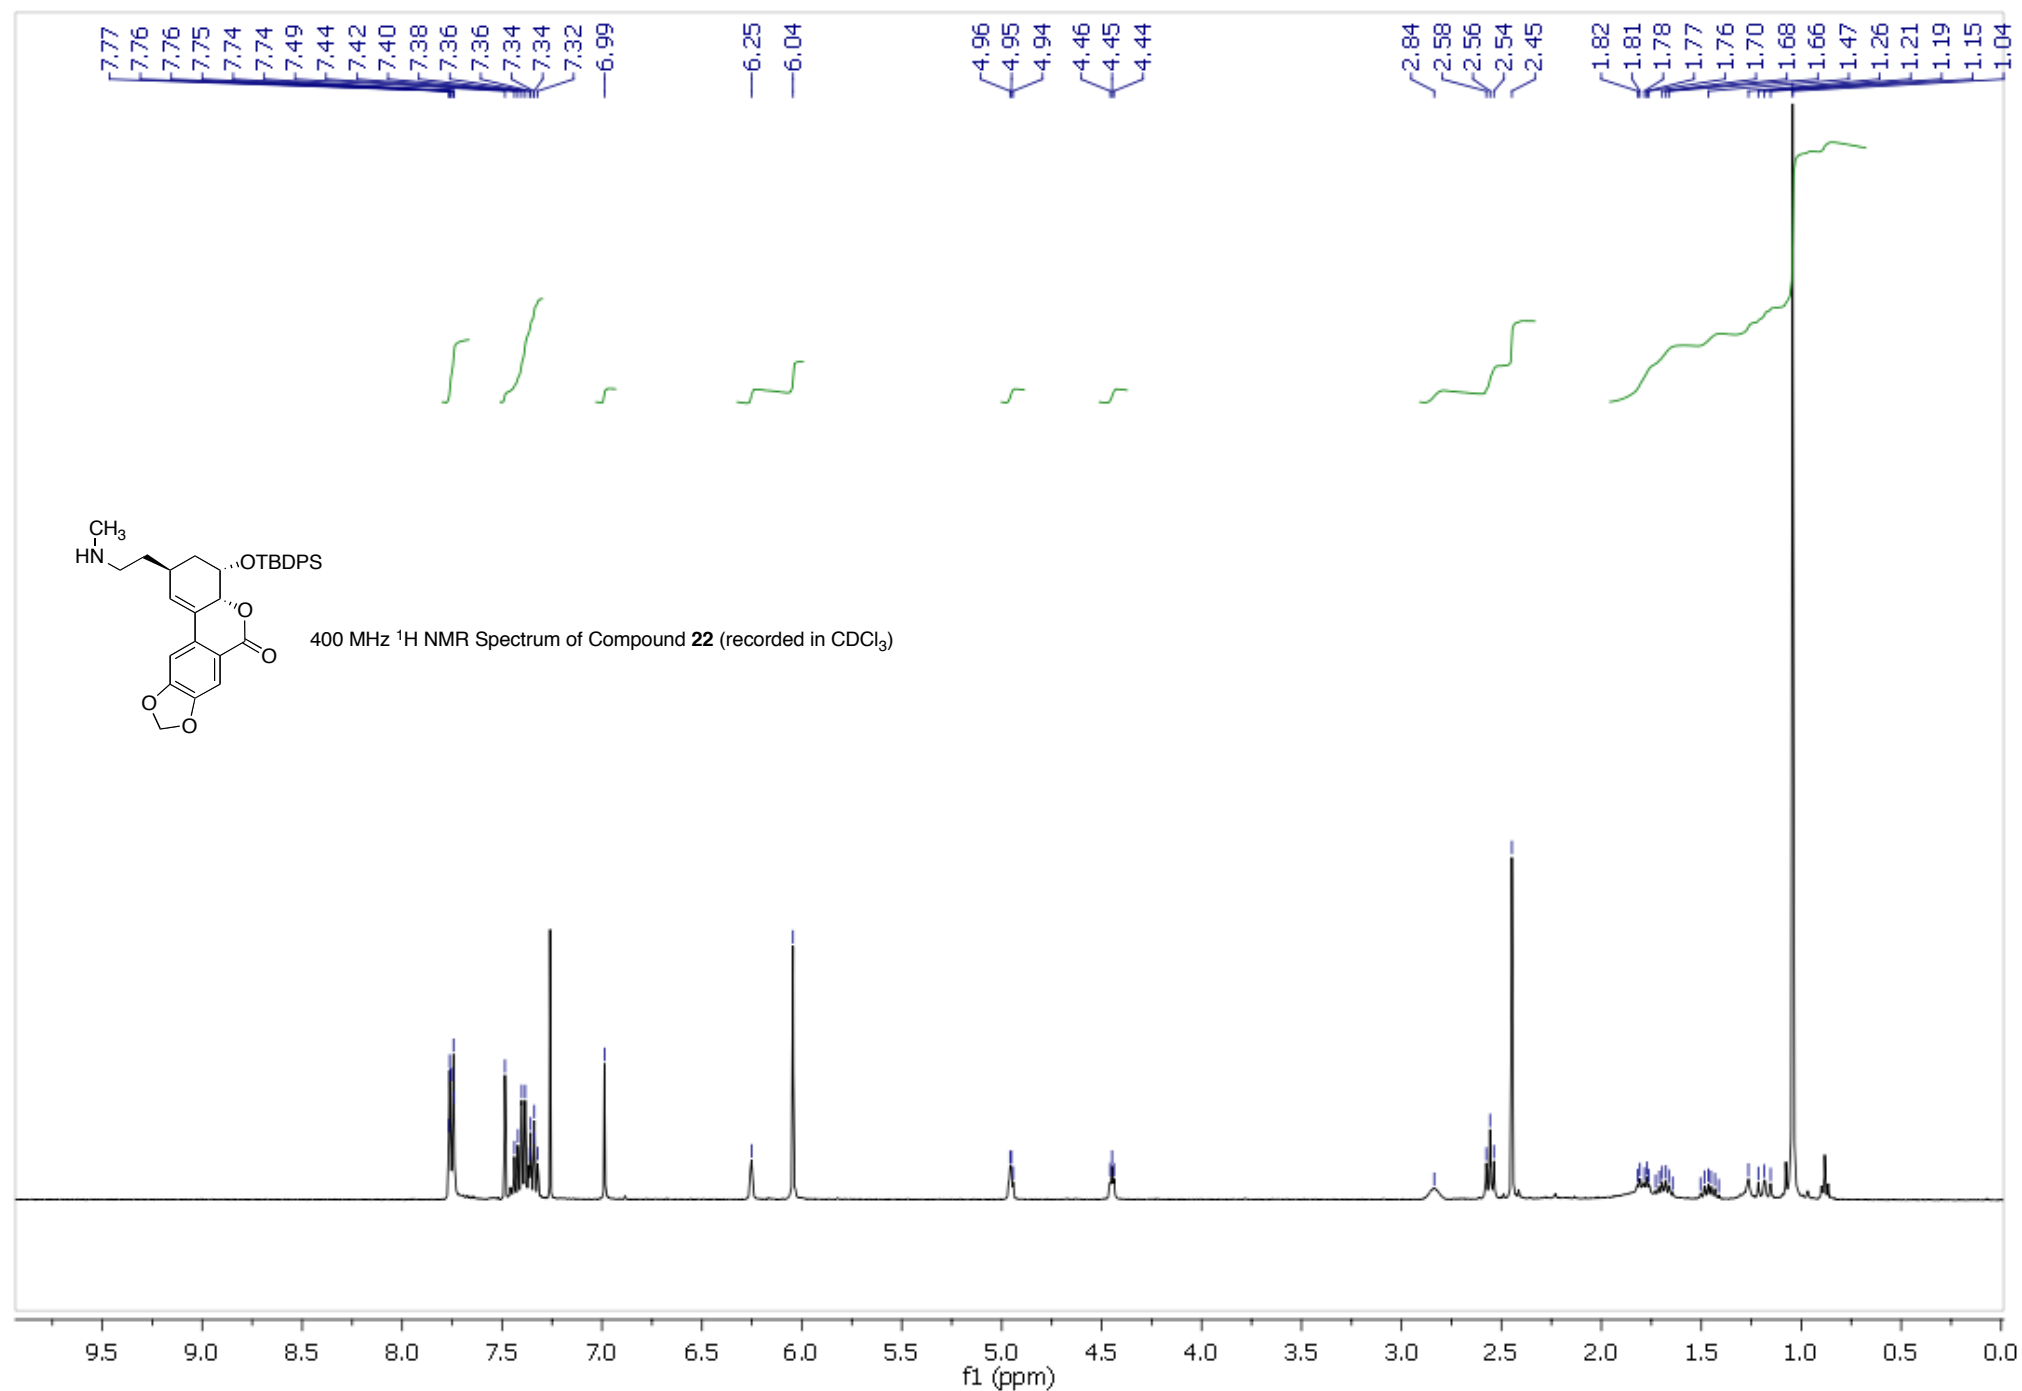



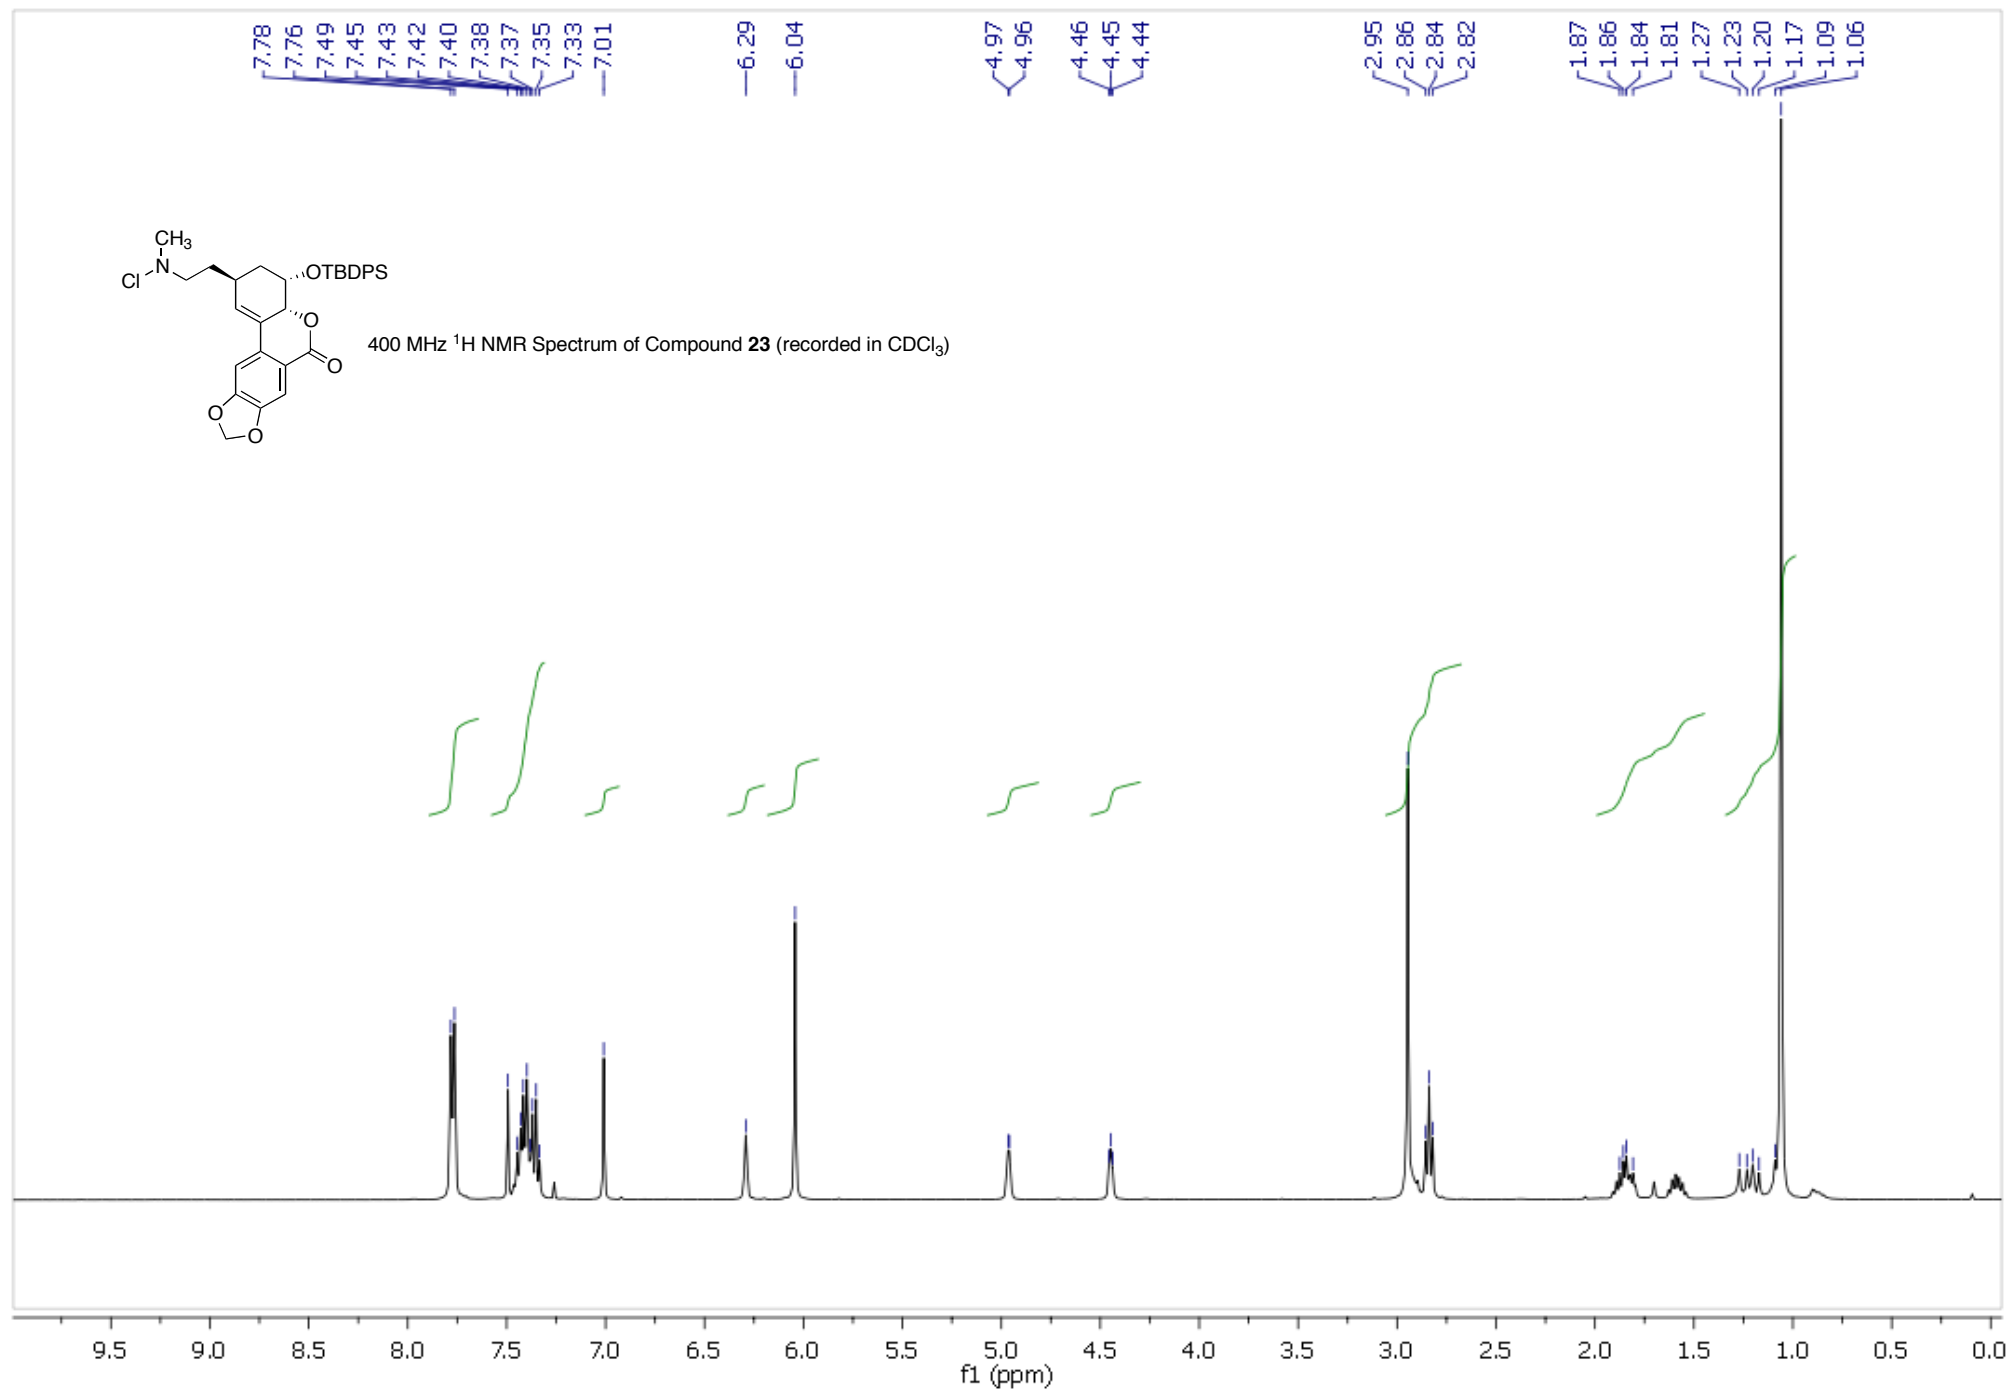

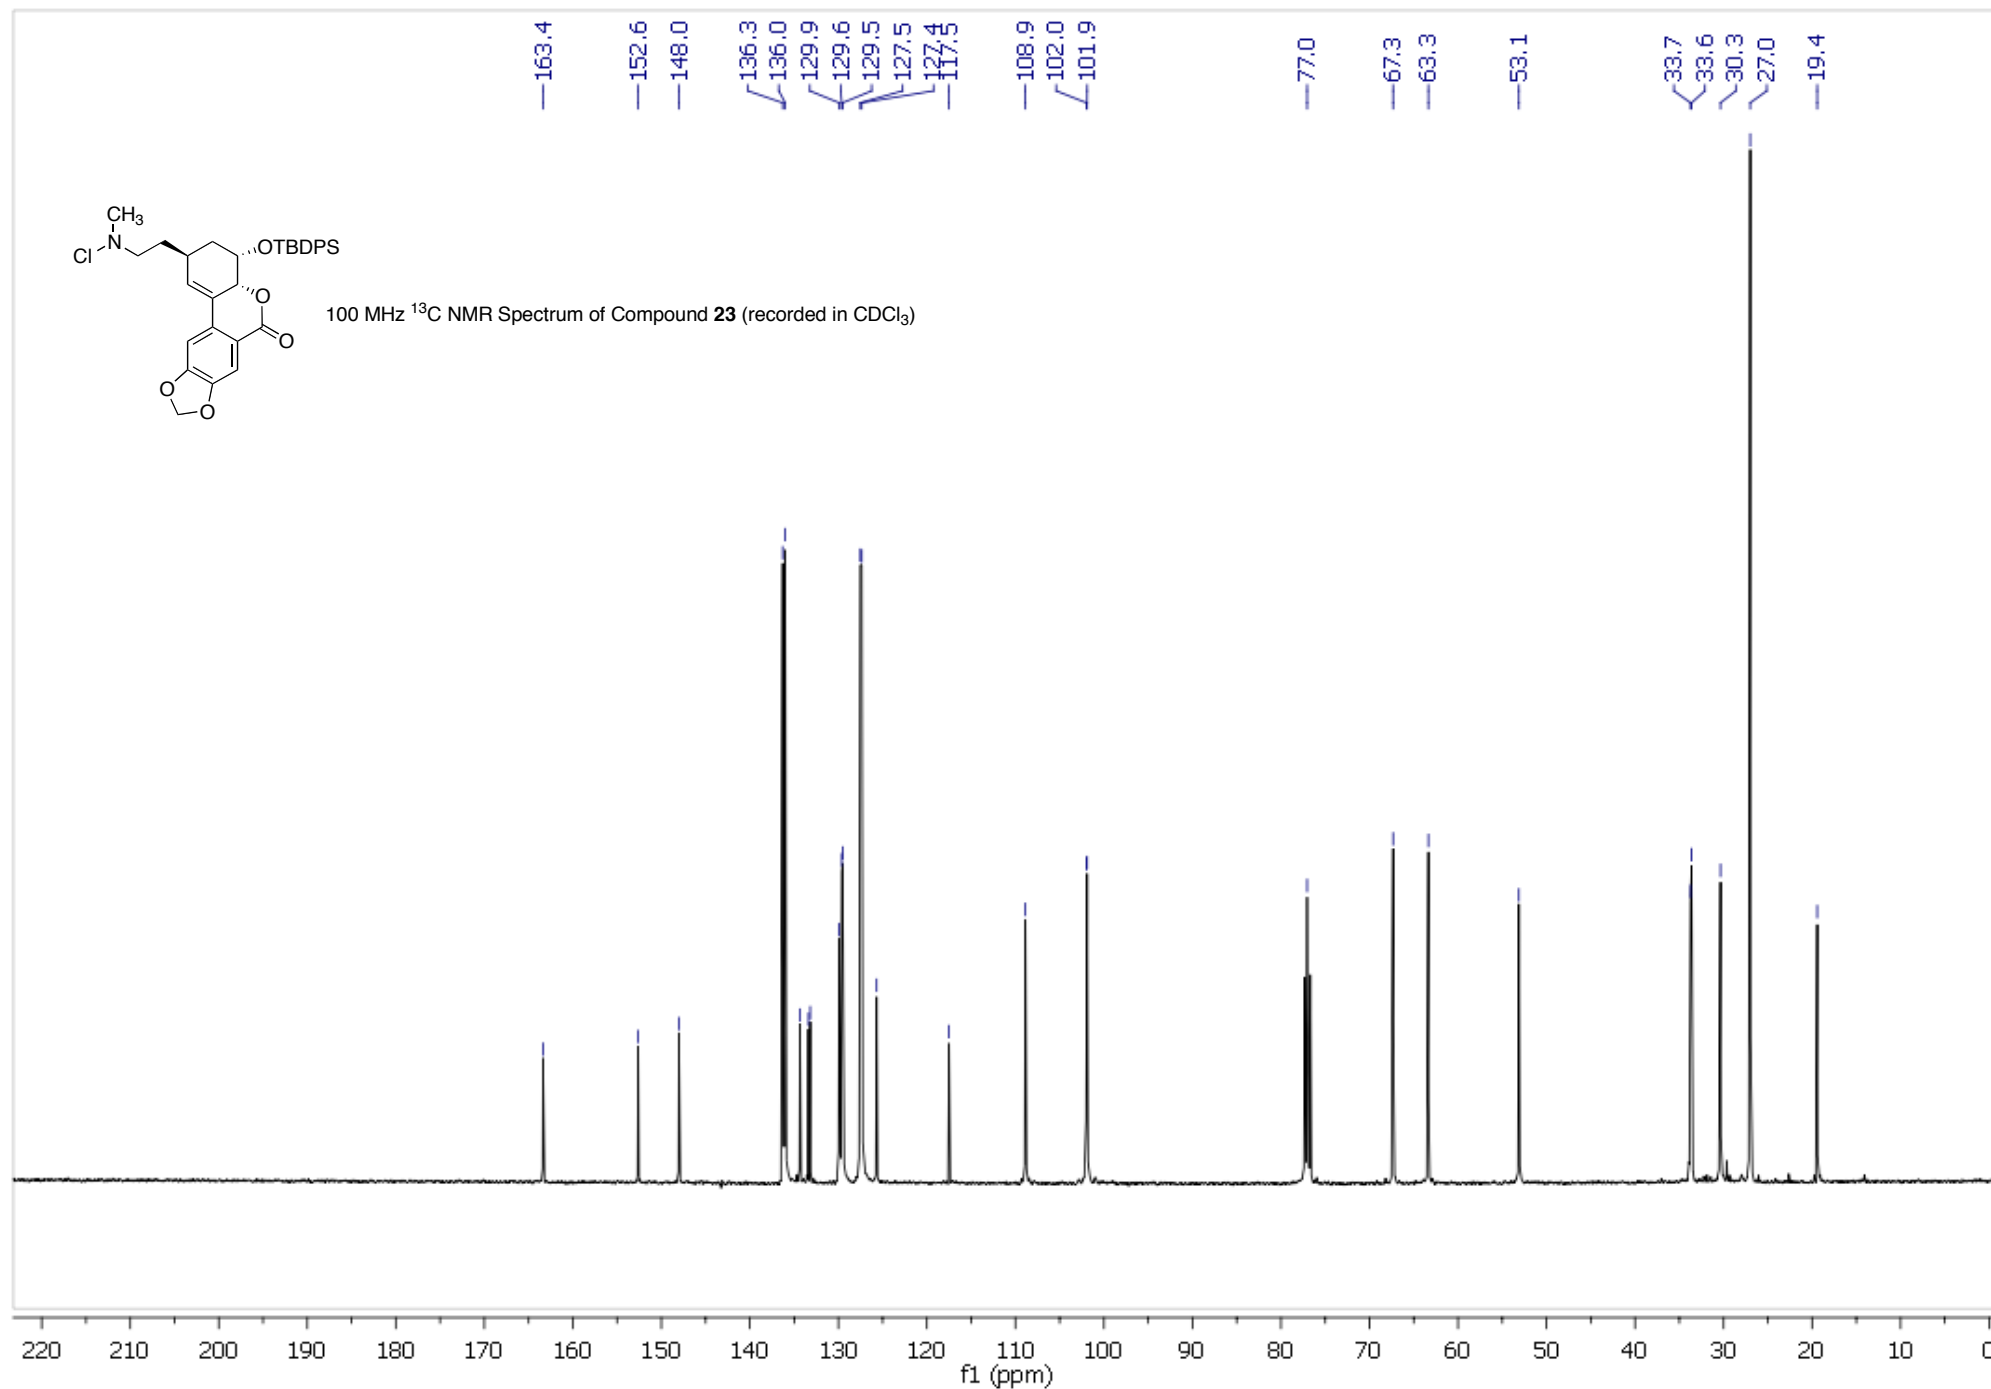



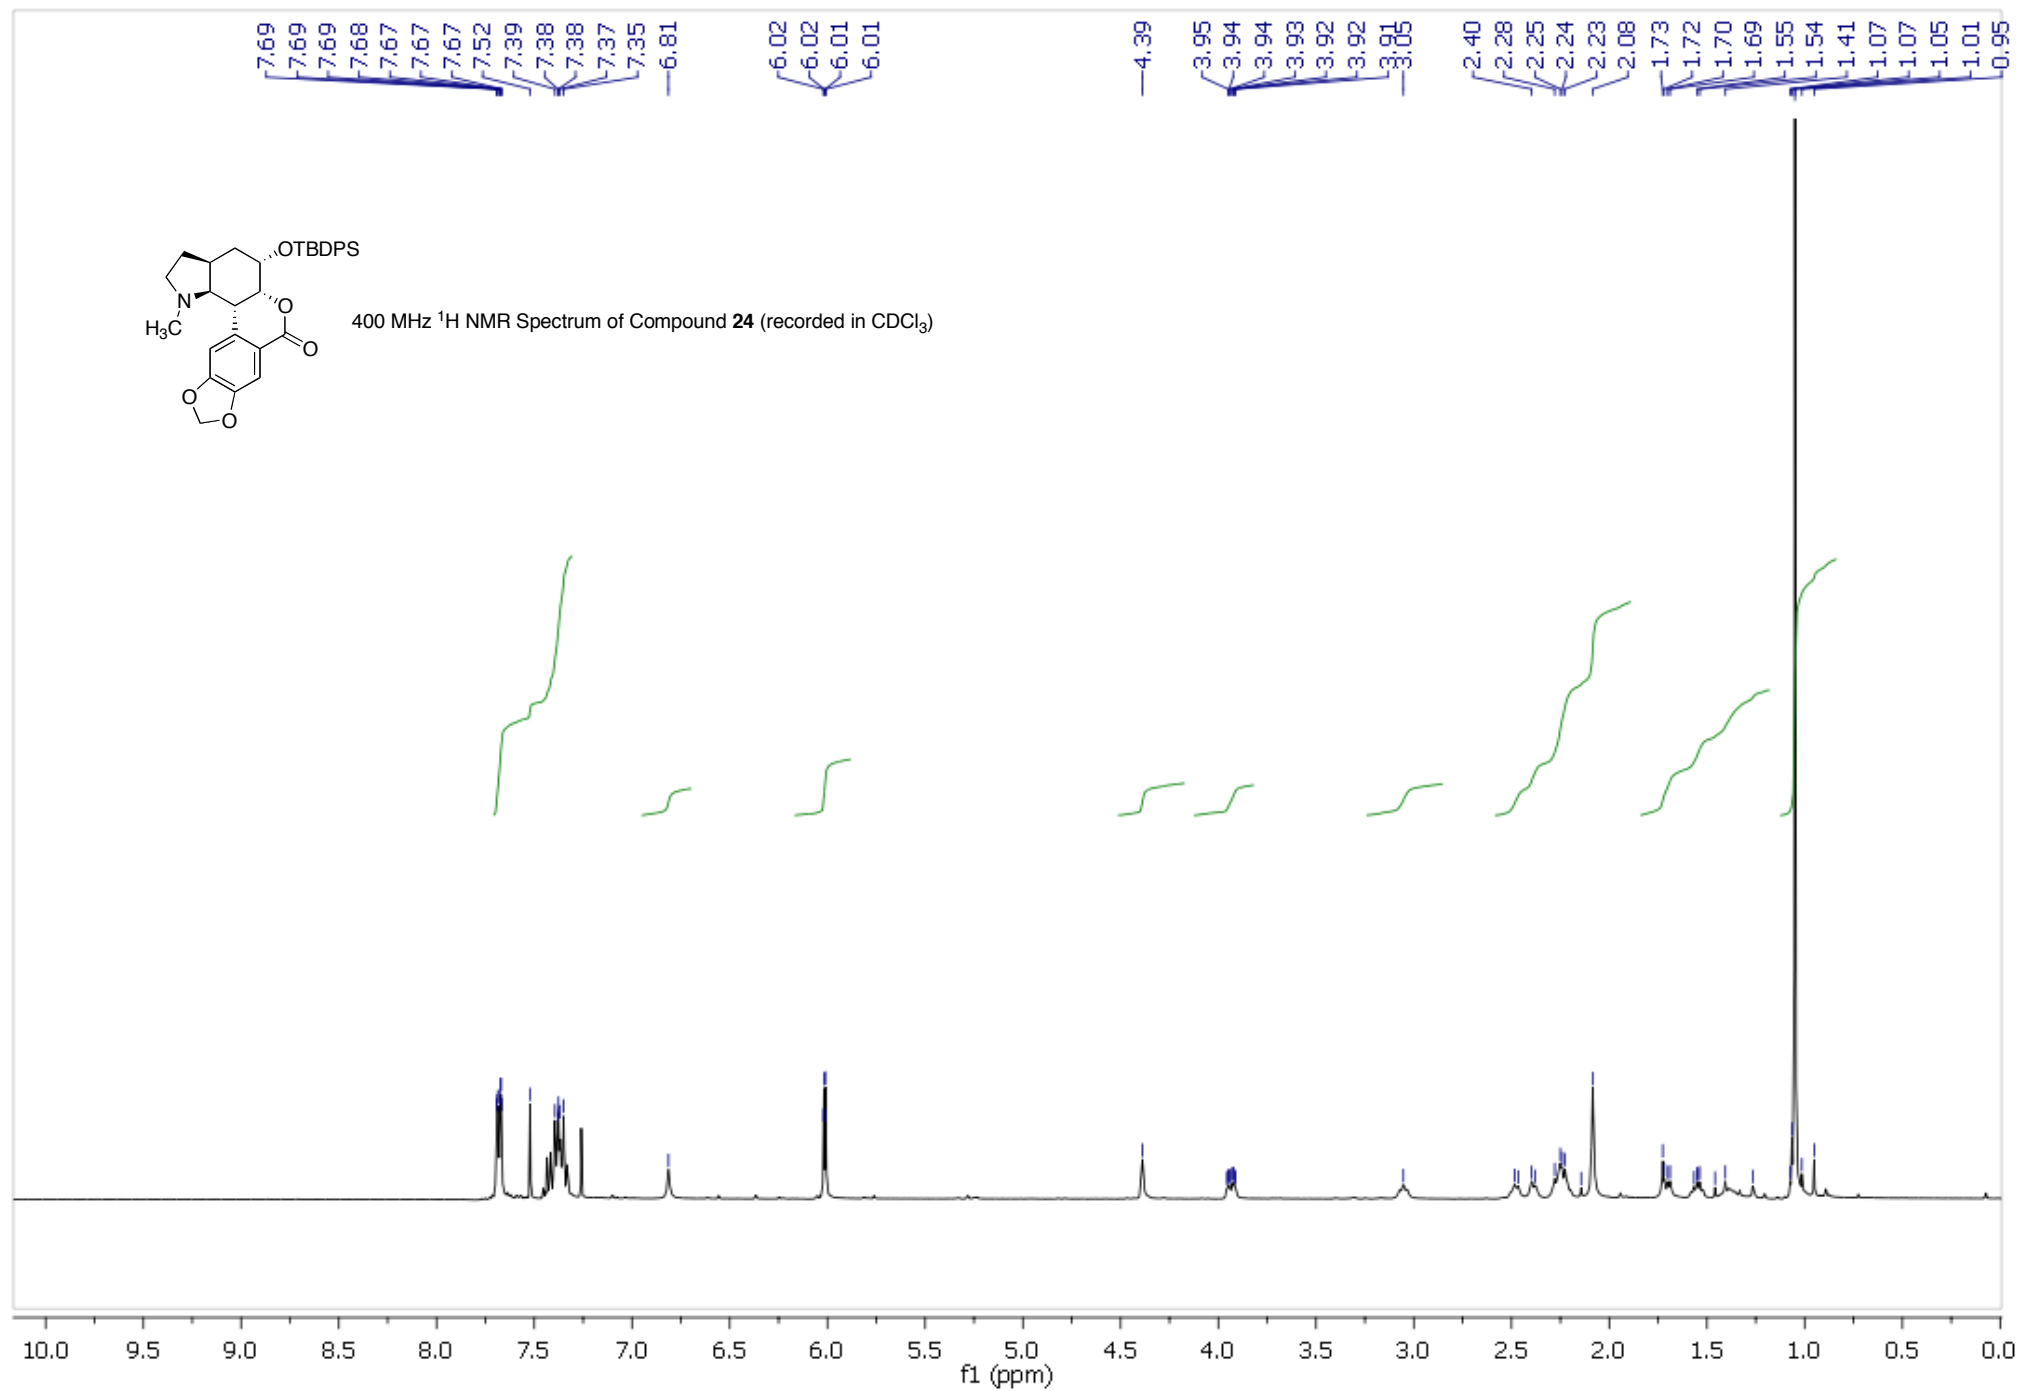

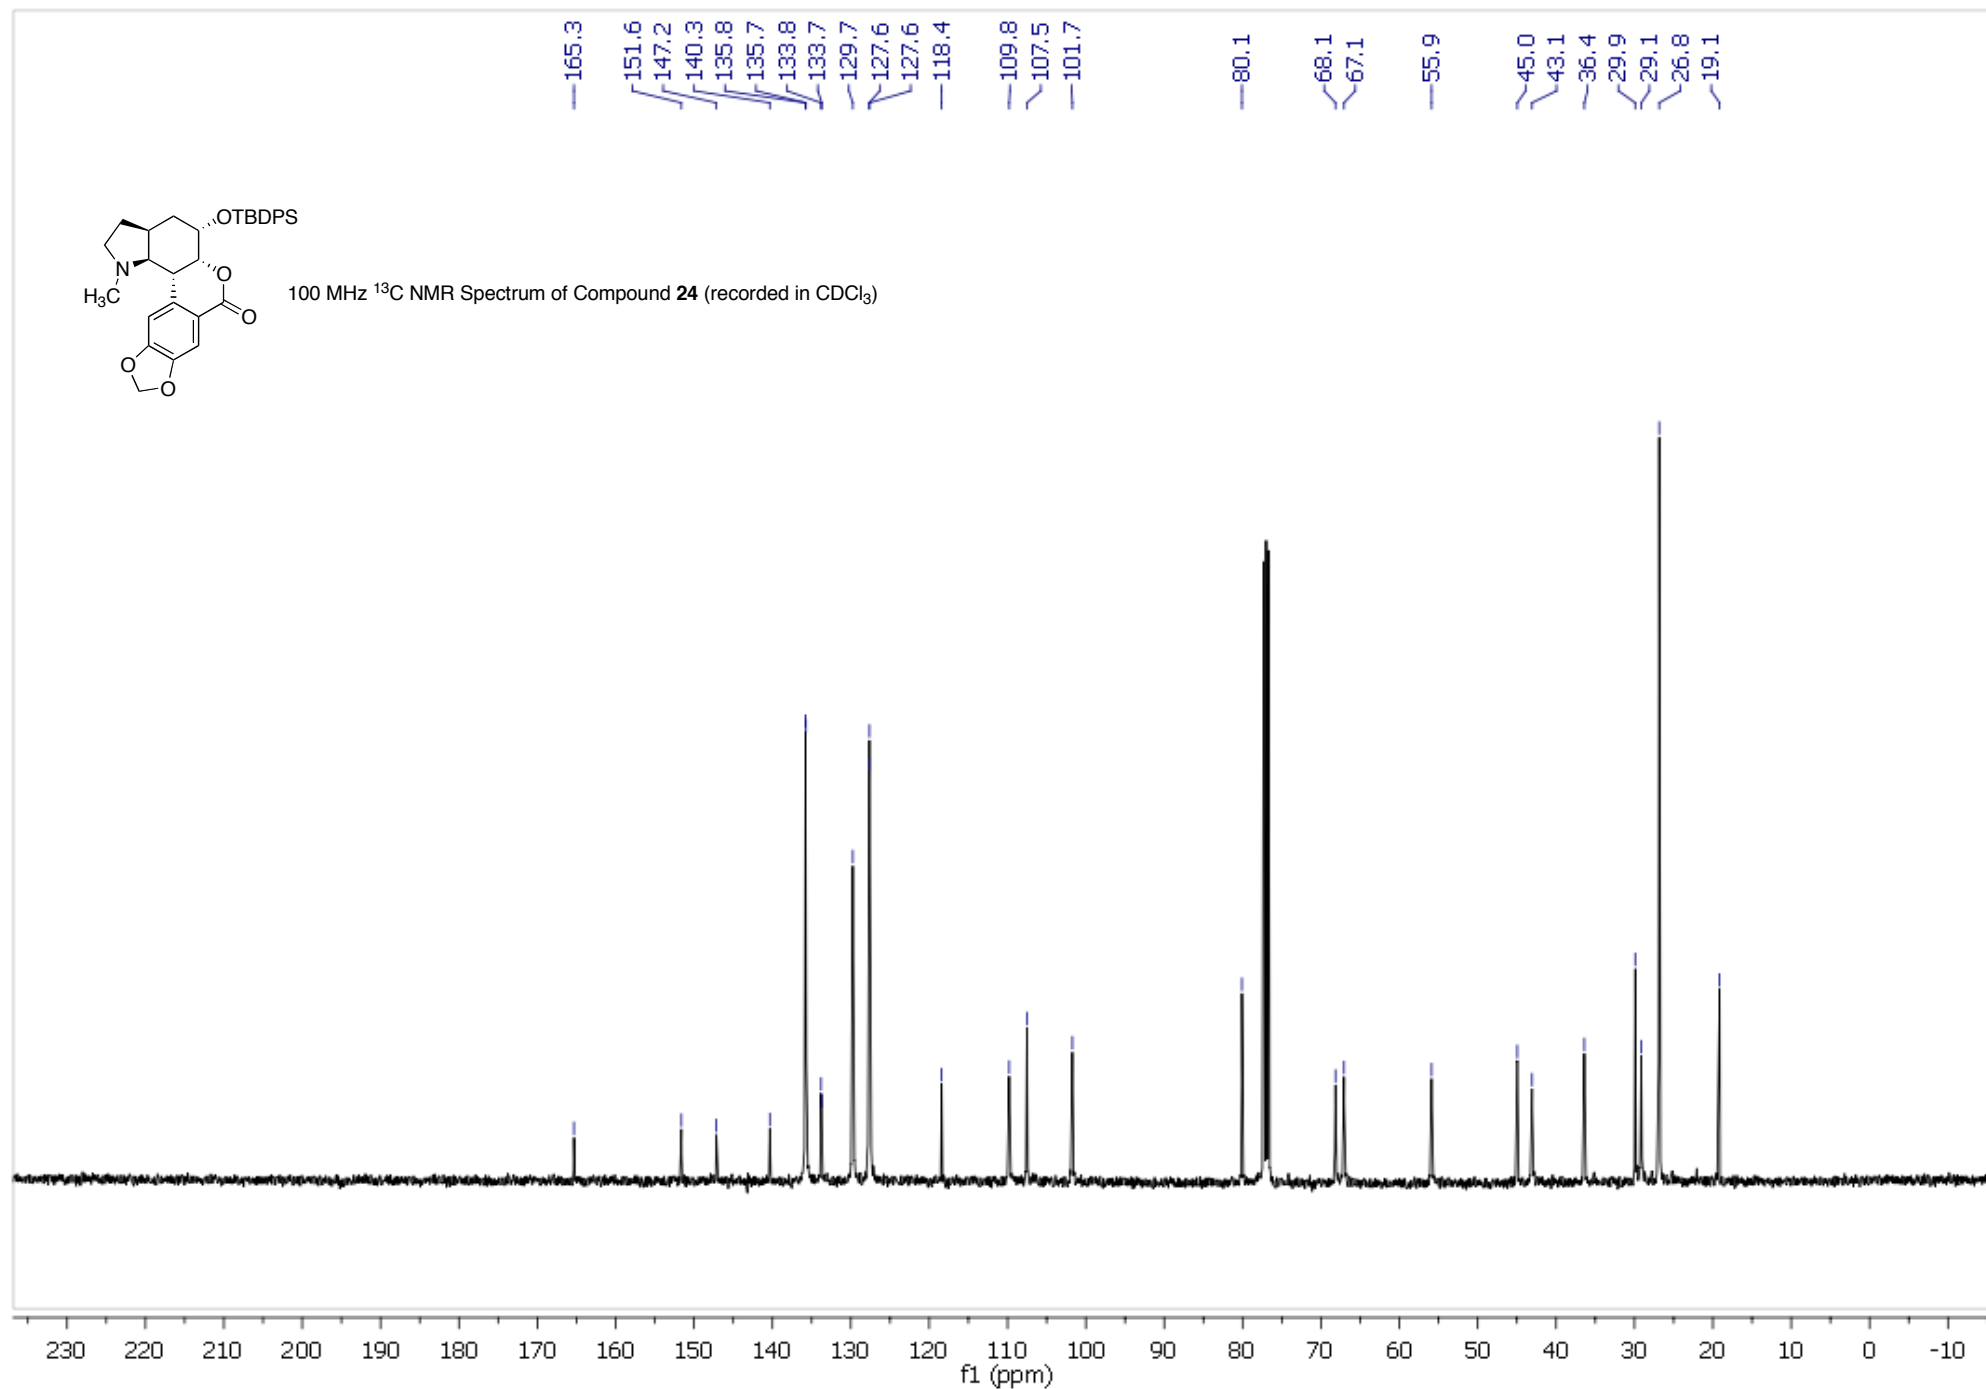

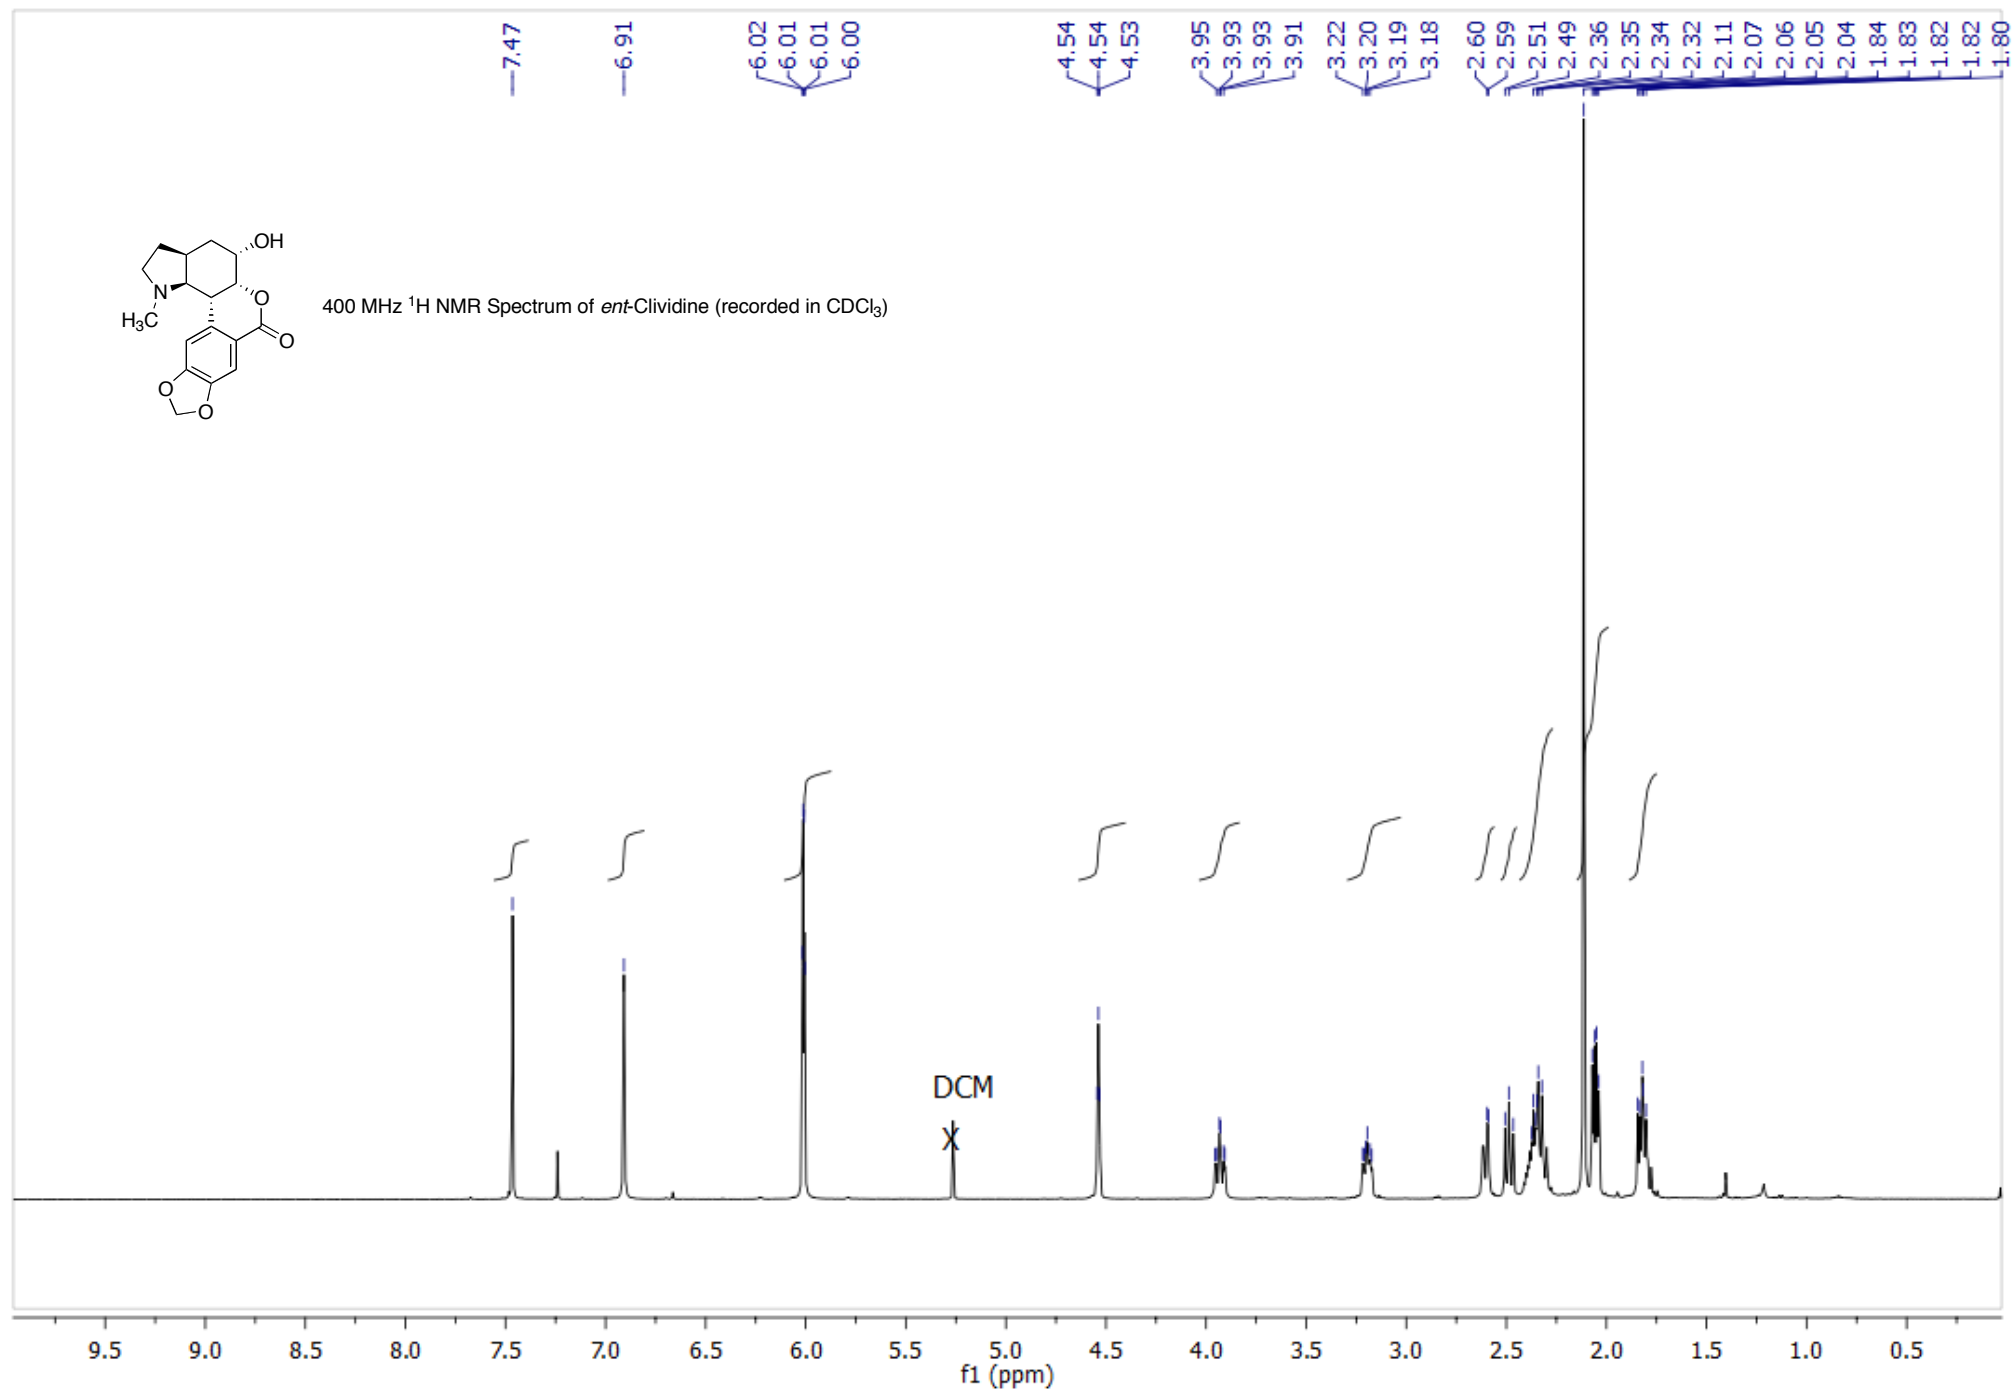

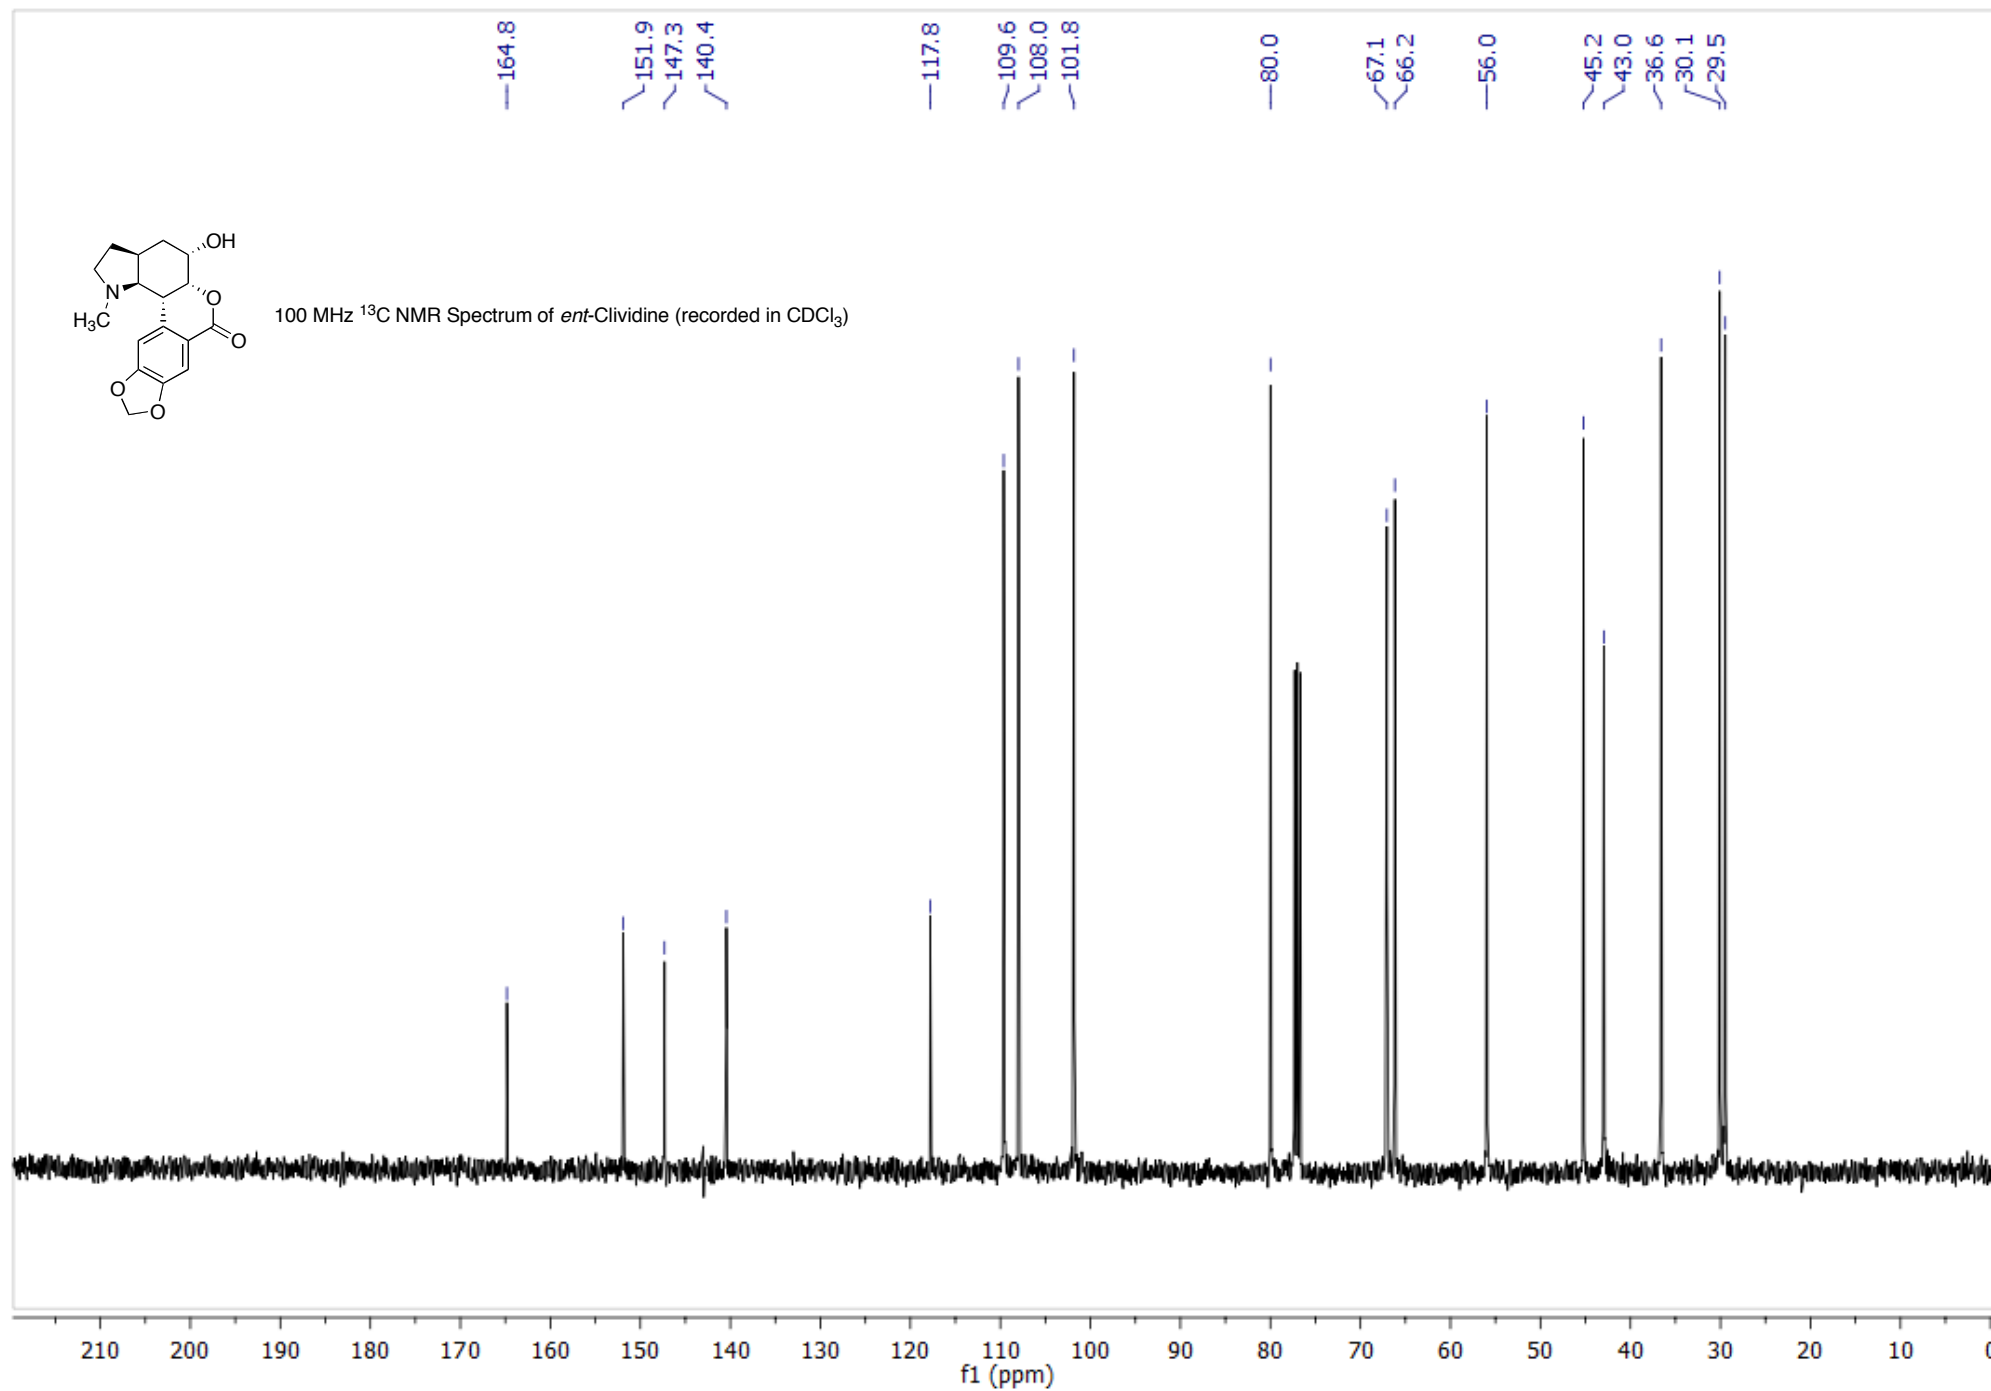

Supplement: Supplementary file 1 [file 4276234]
